# Supplementary material
Source: Springer Nature journal article supplement (https://www.springermedizin.de/resource/supplementary/12967_2012_1249_MOESM4_ESM.pdf/9573332)
Supplement: MOESM4 [file 9573332]

#### Proteomic Data Tables (Additional File 4)

##### Metaproteomic analyses of urinary pellets using LC-nESI-ion trap MS/MS instruments (LTQ-XL and Velos Pro, Thermo Fisher Scientific) and the Mascot search engine version 2.3 (Matrix Science) for spectral data interpretation based on a selection of 19 bacterial and a human genome-wide protein sequence database.

There are 11 separate tables (worksheets) each presenting a protein summary report and a peptide summary report. These reports were derived from Mascot v2.3 analysis using the software Proteome Discoverer (Thermo Fisher Scientific). Each of the pairs of reports (11) represents analysis of one urinary sample (from two technical LC-MS/MS replicate analyses). First, we applied the MudPIT scoring approach for our database searches using Mascot v2.3.

A peptide filter with a Mascot significance threshold of  $p < 0.05$  was applied. Second, to obtain a more robust false discovery rate on the peptide level, we used the Mascot Percolator option where machine learning is employed to recalculate the false peptide discovery rate. A stringent peptide confidence threshold in the Percolator analysis mode was set with a q-value (the minimal false discovery rate)  $\leq 0.01$ . On the protein level, we filtered requiring a minimal number of two distinct peptides with the rank 1, or one distinct peptide only, if the peptide was ranked 1 and if the peptide's PEP threshold value (from the Percolator analysis) was  $10e-4$  or lower. The protein summary report designates the identified proteins (or protein groups based on Mascot's algorithm to define protein groups with high amino acid sequence similarity). The peptide summary report provides the sequences of all identified peptides (above the PEP threshold of  $10e-4$  if a single distinct peptide was identified for a given protein).

The UniRef90 database (<http://www.uniprot.org/>) was comprised of a selection of non-redundant human protein sequences.

Nineteen sequenced bacterial genomes representing species occasionally or frequently associated with bacteriuria UTIs, were also selected for database (downloaded from NCBI).

The total number of protein sequences searched was 283115. Of these, 61395 sequences were from the human UniRef90 dataset.

The bacterial databases are listed below:

- 1) *Lactobacillus delbrueckii* subsp. *bulgaricus* PB2003/044-T3-4 AEAT01000000 (<http://www.ncbi.nlm.nih.gov/Taxonomy/Browser/wwwtax.cgi?id=784613>)
- 2) *Lactobacillus jensenii* JV-V16 ACGQ02000000 (<http://www.ncbi.nlm.nih.gov/Taxonomy/Browser/wwwtax.cgi?id=525329>)
- 3) *Lactobacillus gasseri* JV-V03 ACGQ02000000 (<http://www.ncbi.nlm.nih.gov/Taxonomy/Browser/wwwtax.cgi?id=525326>)
- 4) *Corynebacterium urealyticum* (<http://www.ncbi.nlm.nih.gov/Taxonomy/Browser/wwwtax.cgi?mode=Info&id=504474&lvl=3&lin=f&keep=1&srchmode=1&unlock>)
- 5) *Escherichia coli* UPEC (<http://www.ncbi.nlm.nih.gov/Taxonomy/Browser/wwwtax.cgi?mode=Info&id=199310&lvl=3&lin=f&keep=1&srchmode=1&unlock>)
- 6) *Peptoniphilus asaccharolyticus* (<http://www.ncbi.nlm.nih.gov/Taxonomy/Browser/wwwtax.cgi?mode=Info&id=1258&lvl=3&lin=f&keep=1&srchmode=1&unlock>)
- 7) *Klebsiella pneumoniae* (<http://www.ncbi.nlm.nih.gov/Taxonomy/Browser/wwwtax.cgi?mode=Info&id=507522&lvl=3&lin=f&keep=1&srchmode=1&unlock>)
- 8) *Streptococcus pneumoniae* (<http://www.ncbi.nlm.nih.gov/Taxonomy/Browser/wwwtax.cgi?mode=Info&id=1313&lvl=3&lin=f&keep=1&srchmode=1&unlock>)
- 9) *Prevotella intermedia* (<http://www.ncbi.nlm.nih.gov/Taxonomy/Browser/wwwtax.cgi?mode=Info&id=28131&lvl=3&lin=f&keep=1&srchmode=1&unlock>)
- 10) *Anaerococcus vaginalis* (<http://www.ncbi.nlm.nih.gov/Taxonomy/Browser/wwwtax.cgi?mode=Info&id=33037&lvl=3&lin=f&keep=1&srchmode=1&unlock>)
- 11) *Staphylococcus epidermidis* (<http://www.ncbi.nlm.nih.gov/Taxonomy/Browser/wwwtax.cgi?mode=Info&id=1282&lvl=3&lin=f&keep=1&srchmode=1&unlock>)
- 12) *Proteus mirabilis* (<http://www.ncbi.nlm.nih.gov/Taxonomy/Browser/wwwtax.cgi?mode=Info&id=529507&lvl=3&lin=f&keep=1&srchmode=1&unlock>)
- 13) *Pseudomonas aeruginosa* (<http://www.ncbi.nlm.nih.gov/Taxonomy/Browser/wwwtax.cgi?mode=Info&id=208964&lvl=3&lin=f&keep=1&srchmode=1&unlock>)
- 14) *Finogoldia magna* (<http://www.ncbi.nlm.nih.gov/Taxonomy/Browser/wwwtax.cgi?mode=Info&id=1260&lvl=3&lin=f&keep=1&srchmode=1&unlock>)
- 15) *Enterococcus faecalis* (<http://www.ncbi.nlm.nih.gov/Taxonomy/Browser/wwwtax.cgi?mode=Info&id=1351&lvl=3&lin=f&keep=1&srchmode=1&unlock>)
- 16) *Enterococcus faecium* (<http://www.ncbi.nlm.nih.gov/Taxonomy/Browser/wwwtax.cgi?mode=Info&id=1352&lvl=3&lin=f&keep=1&srchmode=1&unlock>)
- 17) *Morganella morganii* (<http://www.ncbi.nlm.nih.gov/Taxonomy/Browser/wwwtax.cgi?mode=Info&id=582&lvl=3&lin=f&keep=1&srchmode=1&unlock>)
- 18) *Enterobacter hormaechei* (<http://www.ncbi.nlm.nih.gov/Taxonomy/Browser/wwwtax.cgi?mode=Info&id=158836&lvl=3&lin=f&keep=1&srchmode=1&unlock>)
- 19) *Ureaplasma urealyticum* (<http://www.ncbi.nlm.nih.gov/Taxonomy/Browser/wwwtax.cgi?mode=Info&id=2130&lvl=3&lin=f&keep=1&srchmode=1&unlock>)

On the following pages, the number part of the sample identifier (line 1) represents the human subject number (with a peptide summary section following the protein summary section)

**Protein Summary Report**

|              |                                                                                                                                                                                                               |
|--------------|---------------------------------------------------------------------------------------------------------------------------------------------------------------------------------------------------------------|
| Index        | indicates the order of the list in which the table was exported from Proteome Discoverer                                                                                                                      |
| Prot_hit     | indicates protein family grouping; a family member will represent multiple same-set proteins. All proteins in a same-set group are indistinguishable on the basis of the peptide match evidence.              |
| Accession    | gi  and Ref Seq ID                                                                                                                                                                                            |
| Description  | the name of the protein that appears in the Accession column                                                                                                                                                  |
| Mascot score | Mascot incorporates a probability-based implementation of the Mowse algorithm (see <a href="http://www.matrixscience.com/search_form_select.html">http://www.matrixscience.com/search_form_select.html</a> ). |
| Coverage     | the percentage of the protein sequence covered by identified peptides                                                                                                                                         |
| # peptide    | the number of significant distinct peptide sequences in the protein group                                                                                                                                     |
| # PSM        | the total number of identified peptide sequences (peptide spectrum matches) for the protein, including those redundantly identified                                                                           |
| # AA         | the sequence length of the protein                                                                                                                                                                            |
| MW [kDa]     | the calculated molecular weight of the protein (without considering PTMs) and isoelectric point of protein                                                                                                    |
| calc. pI     | the theoretically calculated isoelectric point, which is the pH at which a particular molecule carries no net electrical charge                                                                               |

**Peptide Summary Report**

|                         |                                                                                                                                      |
|-------------------------|--------------------------------------------------------------------------------------------------------------------------------------|
| Sequence                | the sequence of amino acids that compose the peptide                                                                                 |
| Protein Descriptions    | the proteins associated with the peptide. This description is taken from the FASTA file                                              |
| # proteins              | the number of identified proteins in the protein group of a master protein                                                           |
| # protein group         | the number of protein groups in which this peptide is found                                                                          |
| Protein Group Accession | the master protein accession that contain the peptide                                                                                |
| Modifications           | type of modification                                                                                                                 |
| q-value                 | A q-value is the minimal false discovery rate at which the identification is considered correct (a Mascot Percolator analysis value) |
| PEP                     | the probability that the observed PSM is incorrect (a Mascot Percolator analysis value)                                              |
| Charge                  | the charge state of the peptide                                                                                                      |
| m/z [Da]                | the mass-to-charge ratio of the precursor ion, in daltons                                                                            |
| MH+ [Da]                | the protonated monoisotopic mass of the peptides, in daltons                                                                         |
| Delta Mass [Da]         | the difference between the theoretical mass of the peptide and the experimental mass of the precursor ion, in daltons                |

ZDLCSCI\_37 Protein Summary

| index | Prot_hit | Accession    | Description                                                                                                 | Mascot Score | Coverage | # Peptides | # PSMs | # AAs | MW [kDa] | calc. pi |
|-------|----------|--------------|-------------------------------------------------------------------------------------------------------------|--------------|----------|------------|--------|-------|----------|----------|
| 1     | 1        | P63261       | Actin, cytoplasmic 2 n=1334 RepID=ACTG_HUMAN                                                                | 430.28       | 32.53%   | 7          | 10     | 375   | 41.8     | 5.48     |
| 2     | 2        | P35579       | Myosin-9 n=677 Tax=Tetrapoda RepID=MYH9_HUMAN                                                               | 129.54       | 1.63%    | 2          | 2      | 1960  | 226.4    | 5.6      |
| 3     | 3        | P15508       | Spectrin beta chain, erythrocyte n=14 Tax=Euarchoptogilres RepID=SPTB1_MOUSE                                | 119.09       | 1.27%    | 2          | 2      | 2128  | 245.1    | 5.33     |
| 4     | 4        | P04264       | Keratin, type II cytoskeletal 1 n=7 Tax=Eutheria RepID=K2C1_HUMAN                                           | 324.61       | 10.87%   | 2          | 3      | 644   | 66       | 8.12     |
| 5     | 5        | P13645       | Keratin, type I cytoskeletal 10 n=12 Tax=Eutheria RepID=K1C10_HUMAN                                         | 111.28       | 3.25%    | 1          | 1      | 584   | 58.8     | 5.21     |
| 6     | 6.1      | P08727       | Keratin, type I cytoskeletal 19 n=9 Tax=Eutheria RepID=K1C19_HUMAN                                          | 248.48       | 7.25%    | 2          | 4      | 400   | 44.1     | 5.14     |
| 7     | 6.2      | B4DE59       | cDNA FLJ60424, highly similar to Junction plakoglobin n=1 Tax=Homo sapiens RepID=B4DE59_HUMAN               | 248.48       | 5.15%    | 2          | 4      | 563   | 62.6     | 5.17     |
| 8     | 7        | P62937       | Peptidyl-prolyl cis-trans isomerase A n=98 Tax=Theria RepID=PP1A_HUMAN                                      | 191.2        | 16.97%   | 2          | 4      | 165   | 18       | 7.81     |
| 9     | 8        | P11277       | Spectrin beta chain, erythrocyte n=18 Tax=Eutheria RepID=SPTB1_HUMAN                                        | 207.73       | 2.99%    | 4          | 4      | 2137  | 246.3    | 5.27     |
| 10    | 9.1      | E9PFJ3       | Uncharacterized protein n=3 Tax=Simiiformes RepID=E9PFJ3_HUMAN                                              | 600.81       | 9.17%    | 6          | 15     | 578   | 63.3     | 5.31     |
| 11    | 9.2      | P07911       | Uromodulin n=2 Tax=Catarrhini RepID=UROM_HUMAN                                                              | 600.81       | 8.28%    | 6          | 15     | 640   | 69.7     | 5.24     |
| 12    | 10       | P68871       | Hemoglobin subunit beta n=102 Tax=Primates RepID=HBB_HUMAN                                                  | 2997.24      | 14.48%   | 10         | 66     | 147   | 16       | 7.28     |
| 13    | 11       | E9PFT6       | Uncharacterized protein n=2 Tax=Homo sapiens RepID=E9PFT6_HUMAN                                             | 657.72       | 27.66%   | 3          | 18     | 141   | 15.4     | 7.91     |
| 14    | 12       | P00918       | Carbonic anhydrase 2 n=8 Tax=Primates RepID=CAH2_HUMAN                                                      | 185.59       | 15.77%   | 3          | 6      | 260   | 29.2     | 7.4      |
| 15    | 13       | P69905       | Hemoglobin subunit alpha n=29 Tax=Primates RepID=HBA_HUMAN                                                  | 1236.61      | 39.44%   | 5          | 30     | 142   | 15.2     | 8.68     |
| 16    | 14       | P02081       | Hemoglobin fetal subunit beta n=8 Tax=Eutheria RepID=HBFB_BOVIN                                             | 247.92       | 14.48%   | 2          | 13     | 145   | 15.8     | 7.03     |
| 17    | 15       | A4FUA1       | GUCA1B protein (Fragment) n=1 Tax=Homo sapiens RepID=A4FUA1_HUMAN                                           | 336.59       | 58.67%   | 3          | 9      | 75    | 8.6      | 5.41     |
| 18    | 16.1     | P62741       | Hemoglobin subunit gamma-1 n=6 Tax=Hominidae RepID=HBG1_GORGO                                               | 161.29       | 15.65%   | 2          | 11     | 147   | 16.1     | 7.64     |
| 19    | 16.2     | P69891       | Hemoglobin subunit gamma-1 n=20 Tax=Catarrhini RepID=HBG1_HUMAN                                             | 161.29       | 15.65%   | 2          | 11     | 147   | 16.1     | 7.2      |
| 20    | 16.3     | Q9G157       | Hemoglobin subunit gamma n=39 Tax=Simiiformes RepID=HBG_CALIA                                               | 161.29       | 15.65%   | 2          | 11     | 147   | 16       | 6.93     |
| 21    | 17       | P13646       | Keratin, type I cytoskeletal 13 n=13 Tax=Simiiformes RepID=K1C13_HUMAN                                      | 606.2        | 22.27%   | 7          | 16     | 458   | 49.6     | 4.96     |
| 22    | 18.1     | B4DRW1       | cDNA FLJ55805, highly similar to Keratin, type II cytoskeletal 4 n=2 Tax=Hominidae RepID=B4DRW1_HUMAN       | 396.82       | 8.02%    | 3          | 11     | 474   | 51.7     | 6.81     |
| 23    | 18.2     | P19013       | Keratin, type II cytoskeletal 4 n=14 Tax=Simiiformes RepID=K2C4_HUMAN                                       | 396.82       | 7.12%    | 3          | 11     | 534   | 57.2     | 6.61     |
| 24    | 19       | E7UEE8       | Uncharacterized protein n=14 Tax=Eutheria RepID=E7UEE8_HUMAN                                                | 93.79        | 4.62%    | 2          | 3      | 520   | 55.8     | 6.27     |
| 25    | 19.1     | P02538       | Keratin, type II cytoskeletal 6A n=25 Tax=Euarchoptogilres RepID=K2C6A_HUMAN                                | 93.79        | 4.26%    | 2          | 3      | 564   | 60       | 8        |
| 26    | 19.2     | F6RMN8       | Uncharacterized protein n=4 Tax=Simiiformes RepID=F6RMN8_CALIA                                              | 93.79        | 4.49%    | 2          | 3      | 535   | 57.8     | 8.22     |
| 27    | 20.1     | E9PF79       | Pyruvate kinase n=4 Tax=Simiiformes RepID=E9PF79_HUMAN                                                      | 82.19        | 6.33%    | 2          | 2      | 458   | 50       | 7.64     |
| 28    | 20.2     | P14618       | Pyruvate kinase isozymes M1/M2 n=16 Tax=Simiiformes RepID=KPYM_HUMAN                                        | 82.19        | 5.46%    | 2          | 2      | 531   | 57.9     | 7.84     |
| 29    | 20.3     | B4DRT3       | Pyruvate kinase n=2 Tax=Homo sapiens RepID=B4DRT3_HUMAN                                                     | 82.19        | 5.68%    | 2          | 2      | 511   | 55.9     | 7.5      |
| 30    | 20.4     | B4DUU6       | Pyruvate kinase n=4 Tax=Simiiformes RepID=B4DUU6_HUMAN                                                      | 82.19        | 5.62%    | 2          | 2      | 516   | 56.2     | 8.44     |
| 31    | 20.5     | P52480       | Pyruvate kinase isozymes M1/M2 n=40 Tax=Tetrapoda RepID=KPYM_MOUSE                                          | 82.19        | 5.46%    | 2          | 2      | 531   | 57.8     | 7.47     |
| 32    | 21       | P05062       | Fructose-bisphosphate aldolase B n=20 Tax=Eutheria RepID=ALDOB_HUMAN                                        | 90.46        | 4.12%    | 1          | 1      | 364   | 39.4     | 7.87     |
| 33    | 22       | P02730       | Band 3 anion transport protein n=4 Tax=Simiiformes RepID=SB3AT_HUMAN                                        | 416.26       | 8.78%    | 6          | 10     | 911   | 101.7    | 5.19     |
| 34    | 23.1     | P16157-15    | Isoform Er14 of Ankyrin-1 n=9 Tax=Simiiformes RepID=P16157-15                                               | 122.97       | 1.59%    | 2          | 4      | 1821  | 200.1    | 6.92     |
| 35    | 23.2     | P16157       | Ankyrin-1 n=50 Tax=Mammalia RepID=ANK1_HUMAN                                                                | 122.97       | 1.54%    | 2          | 4      | 1881  | 206.1    | 6.01     |
| 36    | 24       | P02549       | Spectrin alpha chain, erythrocyte n=16 Tax=Simiiformes RepID=SPTA1_HUMAN                                    | 567.72       | 3.97%    | 6          | 11     | 2419  | 279.8    | 5.05     |
| 37    | 25.1     | E7ENH1       | Uncharacterized protein n=6 Tax=Coelomata RepID=E7ENH1_HUMAN                                                | 103.15       | 10.70%   | 2          | 3      | 271   | 30.7     | 4.96     |
| 38    | 25.2     | E7EWR1       | Uncharacterized protein n=5 Tax=Simiiformes RepID=E7EWR1_HUMAN                                              | 103.15       | 8.22%    | 2          | 3      | 353   | 39.7     | 4.93     |
| 39    | 25.3     | F7FYG3       | Uncharacterized protein n=3 Tax=Simiiformes RepID=F7FYG3_CALIA                                              | 103.15       | 9.15%    | 2          | 3      | 317   | 35.9     | 4.88     |
| 40    | 25.4     | Q55T81       | Tubulin beta polypeptide n=8 Tax=Eukaryota RepID=Q55T81_HUMAN                                               | 103.15       | 7.80%    | 2          | 3      | 372   | 41.7     | 4.91     |
| 41    | 26.1     | P06899       | Histone H2B type 1-J n=102 Tax=Euteleostomi RepID=H2B1_HUMAN                                                | 172.33       | 11.90%   | 1          | 2      | 126   | 13.9     | 10.32    |
| 42    | 26.2     | P62807       | Histone H2B type 1-C/E/F/G/I n=44 Tax=Euteleostomi RepID=H2B1C_HUMAN                                        | 172.33       | 11.90%   | 1          | 2      | 126   | 13.9     | 10.32    |
| 43    | 26.3     | B4DR52       | Histone H2B n=5 Tax=Euarchoptogilres RepID=B4DR52_HUMAN                                                     | 172.33       | 9.04%    | 1          | 2      | 166   | 18       | 10.32    |
| 44    | 26.4     | P58876       | Histone H2B type 1-D n=136 Tax=Coelomata RepID=H2B1D_HUMAN                                                  | 172.33       | 11.90%   | 1          | 2      | 126   | 13.9     | 10.32    |
| 45    | 27.1     | E9PEX0       | Uncharacterized protein n=2 Tax=Homo sapiens RepID=E9PEX0_HUMAN                                             | 84.53        | 2.27%    | 1          | 1      | 704   | 78.4     | 5.59     |
| 46    | 27.2     | E9PEW9       | Uncharacterized protein n=3 Tax=Eutheria RepID=E9PEW9_HUMAN                                                 | 84.53        | 2.09%    | 1          | 1      | 767   | 86       | 5.43     |
| 47    | 27.3     | P11171       | Protein 4.1 n=17 Tax=Eutheria RepID=41_HUMAN                                                                | 84.53        | 1.85%    | 1          | 1      | 864   | 97       | 5.58     |
| 48    | 27.4     | Q1WWM3       | EPB41 protein (Fragment) n=6 Tax=Eutheria RepID=Q1WWM3_HUMAN                                                | 84.53        | 2.16%    | 1          | 1      | 742   | 83.2     | 5.72     |
| 49    | 27.5     | Q6Q7P4       | Protein 4.1 n=15 Tax=Eutheria RepID=41_CANFA                                                                | 84.53        | 1.98%    | 1          | 1      | 810   | 90.6     | 5.55     |
| 50    | 28.1     | UPI000D48568 | UPI000D48568 related cluster n=1 Tax=Homo sapiens RepID=UPI000D48568                                        | 149.43       | 8.60%    | 1          | 3      | 186   | 20.4     | 9.06     |
| 51    | 28.2     | P04792       | Heat shock protein beta-1 n=6 Tax=Simiiformes RepID=HSPB1_HUMAN                                             | 149.43       | 7.80%    | 1          | 3      | 205   | 22.8     | 6.4      |
| 52    | 29.1     | A8MX94       | Uncharacterized protein n=1 Tax=Homo sapiens RepID=A8MX94_HUMAN                                             | 202.44       | 9.20%    | 1          | 2      | 174   | 19.5     | 5.97     |
| 53    | 29.2     | P09211       | Glutathione S-transferase P n=4 Tax=Simiiformes RepID=GSTP1_HUMAN                                           | 202.44       | 7.62%    | 1          | 2      | 210   | 23.3     | 5.64     |
| 54    | 30.1     | B4DUK1       | cDNA FLJ51310, moderately similar to Peroxiredoxin-6 (EC 1.11.1.15) n=1 Tax=Homo sapiens RepID=B4DUK1_HUMAN | 264.19       | 20.79%   | 1          | 4      | 101   | 11.2     | 5.39     |
| 55    | 30.2     | P30041       | Peroxiredoxin-6 n=17 Tax=Eutheria RepID=PRDX6_HUMAN                                                         | 264.19       | 9.38%    | 1          | 4      | 224   | 25       | 6.38     |
| 56    | 31       | P00915       | Carbonic anhydrase 1 n=8 Tax=Catarrhini RepID=CAH1_HUMAN                                                    | 353.05       | 27.97%   | 5          | 9      | 261   | 28.9     | 7.12     |
| 57    | 32.1     | B4DY56       | ATP synthase subunit alpha n=3 Tax=Eutheria RepID=B4DY56_HUMAN                                              | 74.41        | 4.71%    | 1          | 1      | 531   | 57.5     | 9.22     |
| 58    | 32.2     | P25705       | ATP synthase subunit alpha, mitochondrial n=53 Tax=Euteleostomi RepID=ATPA_HUMAN                            | 74.41        | 4.52%    | 1          | 1      | 553   | 59.7     | 9.13     |
| 59    | 33.1     | Q5T3N1       | Annexin A1 (Fragment) n=3 Tax=Eutheria RepID=Q5T3N1_HUMAN                                                   | 182.48       | 19.12%   | 2          | 3      | 204   | 22.7     | 5.53     |
| 60    | 33.2     | P04083       | Annexin A1 n=14 Tax=Eutheria RepID=ANXA1_HUMAN                                                              | 182.48       | 11.27%   | 2          | 3      | 346   | 38.7     | 7.02     |
| 61    | 34.1     | F7GZR9       | Uncharacterized protein n=2 Tax=Simiiformes RepID=F7GZR9_CALIA                                              | 81.2         | 16.07%   | 1          | 1      | 112   | 12.5     | 6.6      |
| 62    | 34.2     | P23528       | Cofilin-1 n=29 Tax=Eutheria RepID=COF1_HUMAN                                                                | 81.2         | 10.84%   | 1          | 1      | 166   | 18.5     | 8.09     |
| 63    | 35       | P45974       | Ubiquitin carboxyl-terminal hydrolase 5 n=20 Tax=Amniota RepID=UBP5_HUMAN                                   | 67.96        | 3.03%    | 1          | 1      | 858   | 95.7     | 5.03     |





| Sequence                         | Protein Descriptions                                | # Proteins | # Protein Groups | Protein Group Accessions | Modifications  | q-Value | PEP      | Charge | m/z [Da]   | MH+ [Da]   | Delta Mass [Da] |
|----------------------------------|-----------------------------------------------------|------------|------------------|--------------------------|----------------|---------|----------|--------|------------|------------|-----------------|
| FFESFGDLTPDAVmGNPK               | Hemoglobin subunit beta n=102 Tax=Primates Ref      | 1          | 1                | P68871                   | M15(Oxidation) | 0       | 0.000886 | 2      | 1038.41272 | 2075.81816 | 0.44            |
| PGGLLGDVAPNFEANTTVGR             | cDNA FLJ51310, moderately similar to Peroxiredox    | 2          | 1                | B4DUK1                   |                | 0       | 1.59E-07 | 2      | 1049.62878 | 2098.25029 | 0.08            |
| PGGLLGDVAPNFEANTTVGR             | cDNA FLJ51310, moderately similar to Peroxiredox    | 2          | 1                | B4DUK1                   |                | 0       | 6.52E-08 | 2      | 1049.92371 | 2098.84014 | 0.37            |
| PGGLLGDVAPNFEANTTVGR             | cDNA FLJ51310, moderately similar to Peroxiredox    | 2          | 1                | B4DUK1                   |                | 0       | 9.22E-07 | 2      | 1049.94446 | 2098.88164 | 0.39            |
| PGGLLGDVAPNFEANTTVGR             | cDNA FLJ51310, moderately similar to Peroxiredox    | 2          | 1                | B4DUK1                   |                | 0       | 3.19E-07 | 2      | 1049.96448 | 2098.92168 | 0.41            |
| EAVEKEFELPLNWMKDK                | Endoplasmin n=58 Tax=Amniota RepID=ENPL_HU1         | 1          | 1                | P14625                   |                | 0       | 0.0127   | 3      | 703.05579  | 2107.15281 | 0.37            |
| GLDAHLEQIFQEAHGMVAR              | Spectrin beta chain, erythrocyte n=18 Tax=Eutheri   | 1          | 1                | P11277                   |                | 0       | 1.18E-05 | 3      | 708.08832  | 2122.2504  | 0.07            |
| aSPDWGYDDKNGPEQWSK               | Carbonic anhydrase 1 n=8 Tax=Catarrhini. RepID=C    | 1          | 1                | P00915                   | N-Term(Acetyl) | 0       | 3.71E-05 | 2      | 1061.82056 | 2122.63384 | 0.36            |
| aSPDWGYDDKNGPEQWSK               | Carbonic anhydrase 1 n=8 Tax=Catarrhini. RepID=C    | 1          | 1                | P00915                   | N-Term(Acetyl) | 0       | 1.23E-05 | 2      | 1061.86084 | 2122.7144  | 0.4             |
| aSPDWGYDDKNGPEQWSK               | Carbonic anhydrase 1 n=8 Tax=Catarrhini. RepID=C    | 1          | 1                | P00915                   | N-Term(Acetyl) | 0       | 3.40E-05 | 2      | 1061.87134 | 2122.7354  | 0.41            |
| aSPDWGYDDKNGPEQWSK               | Carbonic anhydrase 1 n=8 Tax=Catarrhini. RepID=C    | 1          | 1                | P00915                   | N-Term(Acetyl) | 0       | 3.54E-06 | 2      | 1062.09106 | 2123.17485 | 0.63            |
| SAVTALWGKVNDEVGGEALGR            | Hemoglobin subunit beta n=102 Tax=Primates Ref      | 1          | 1                | P68871                   |                | 0       | 3.72E-08 | 2      | 1115.03845 | 2229.06963 | 0.45            |
| SAVTALWGKVNDEVGGEALGR            | Hemoglobin subunit beta n=102 Tax=Primates Ref      | 1          | 1                | P68871                   |                | 0       | 4.86E-08 | 2      | 1115.03894 | 2229.0706  | 0.45            |
| VYVELQELVMDEKNQELR               | Band 3 anion transport protein n=4 Tax=Simiiform    | 1          | 1                | P02730                   |                | 0       | 0.000814 | 3      | 745.88623  | 2235.64414 | 0.17            |
| VYVELQELVMDEKNQELR               | Band 3 anion transport protein n=4 Tax=Simiiform    | 1          | 1                | P02730                   |                | 0       | 3.69E-06 | 2      | 1118.44128 | 2235.87529 | 0.37            |
| VYVELQELVMDEKNQELR               | Band 3 anion transport protein n=4 Tax=Simiiform    | 1          | 1                | P02730                   |                | 0       | 8.61E-06 | 2      | 1118.4801  | 2235.95293 | 0.41            |
| EIINVGHSFHVNFEDNDNR              | Carbonic anhydrase 1 n=8 Tax=Catarrhini. RepID=C    | 1          | 1                | P00915                   |                | 0       | 6.35E-05 | 3      | 752.97333  | 2256.90543 | 0.29            |
| FFESFGDLTPDAVmGNPKVK             | Hemoglobin subunit beta n=102 Tax=Primates Ref      | 1          | 1                | P68871                   |                | 0       | 7.34E-05 | 3      | 763.08923  | 2287.25315 | 0.38            |
| GGPGSAVSPYPTFNPSDVAALHK          | Annexin A1 (Fragment) n=3 Tax=Eutheria RepID=C      | 2          | 1                | Q5T3N1                   |                | 0       | 6.53E-06 | 3      | 786.48773  | 2357.44864 | 0.43            |
| GGGGGSGSGSSYSGGGSGSGGGGGGGR      | Keratin, type II cytoskeletal 1 n=7 Tax=Eutheria Re | 1          | 1                | P04264                   |                | 0       | 2.59E-09 | 2      | 1192.96936 | 2384.93144 | 0.49            |
| ILNNGHAFNVEFDDSDQKAVLK           | Carbonic anhydrase 2 n=8 Tax=Primates RepID=CA      | 1          | 1                | P00918                   |                | 0       | 6.70E-06 | 3      | 825.69489  | 2475.0701  | 0.28            |
| ILNNGHAFNVEFDDSDQKAVLK           | Carbonic anhydrase 2 n=8 Tax=Primates RepID=CA      | 1          | 1                | P00918                   |                | 0       | 5.62E-07 | 3      | 825.83325  | 2475.4852  | 0.42            |
| ILNNGHAFNVEFDDSDQKAVLK           | Carbonic anhydrase 2 n=8 Tax=Primates RepID=CA      | 1          | 1                | P00918                   |                | 0       | 3.44E-06 | 3      | 825.85559  | 2475.52222 | 0.44            |
| HQGVmVGMGKDSVVGDEAQSQR           | Actin, cytoplasmic 2 n=1334 RepID=ACTG_HUMA         | 1          | 1                | P63261                   | M5(Oxidation)  | 0       | 5.67E-08 | 3      | 842.12415  | 2524.35788 | 0.4             |
| ILGADTSVLEETGRVLSGDGIAR          | ATP synthase subunit alpha n=3 Tax=Eutheria Rep     | 2          | 1                | B4DY56                   |                | 0       | 5.79E-06 | 3      | 853.54382  | 2558.61692 | 0.42            |
| DSTIQVVENGESQGRFSVQMFR           | Uncharacterized protein n=3 Tax=Simiiformes Rep     | 2          | 1                | E9PFJ3                   |                | 0       | 0.000505 | 3      | 868.14307  | 2600.54123 | 0.39            |
| SLSNVGDNVPMQHNRPQPLK             | Carbonic anhydrase 1 n=8 Tax=Catarrhini. RepID=C    | 1          | 1                | P00915                   |                | 0       | 0.000696 | 3      | 920.85193  | 2760.54123 | 0.38            |
| IGVEELKEFSTYKFFDENLTR            | Spectrin alpha chain, erythrocyte n=16 Tax=Simiifc  | 1          | 1                | P02549                   |                | 0       | 2.67E-05 | 3      | 934.50952  | 2801.51401 | 0.38            |
| IGVEELQESVPLKFLGPGYTGR           | Ubiquitin carboxyl-terminal hydrolase 5 n=20 Tax=   | 1          | 1                | P45974                   |                | 0       | 5.98E-05 | 3      | 953.14478  | 2857.41977 | 0.3             |
| SLSNVGDNVPMQHNRPQPLKGR           | Carbonic anhydrase 1 n=8 Tax=Catarrhini. RepID=C    | 1          | 1                | P00915                   |                | 0       | 1.08E-07 | 3      | 991.93237  | 2973.78257 | 0.42            |
| VHLTPEEKSAVTALWGKVNDEVGGEALGR    | Hemoglobin subunit beta n=102 Tax=Primates Ref      | 1          | 1                | P68871                   |                | 0       | 5.99E-09 | 3      | 1054.90686 | 3162.70603 | 0.35            |
| VHLTPEEKSAVTALWGKVNDEVGGEALGR    | Hemoglobin subunit beta n=102 Tax=Primates Ref      | 1          | 1                | P68871                   |                | 0       | 2.21E-08 | 3      | 1054.91101 | 3162.71848 | 0.35            |
| TTGVMDSGDVTHTVPIYEGYALPHAILR     | Actin, cytoplasmic 2 n=1334 RepID=ACTG_HUMA         | 1          | 1                | P63261                   |                | 0       | 5.28E-08 | 3      | 1062.20667 | 3184.60544 | 0.33            |
| GSYGSGSGSGSGSGSGGGGGHGSYSGSSGGYR | Keratin, type II cytoskeletal 1 n=7 Tax=Eutheria Re | 1          | 1                | P04264                   |                | 0       | 3.36E-08 | 3      | 1105.04285 | 3313.11399 | 0.27            |
| GSYSGSGSGSGSGSGGGGGHGSYSGSSGGYR  | Keratin, type II cytoskeletal 1 n=7 Tax=Eutheria Re | 1          | 1                | P04264                   |                | 0       | 4.13E-07 | 3      | 1105.1947  | 3313.56955 | 0.42            |

**2DLCS1 31 Protein Summary**

| index | Prot_hit | Accession | Description                                                                          | Mascot Score | Coverage | # Peptides | # PSMs | # AAs | MW [kDa] | calc. pl |
|-------|----------|-----------|--------------------------------------------------------------------------------------|--------------|----------|------------|--------|-------|----------|----------|
| 1     | 1.1      | 334126439 | translation elongation factor Tu [Enterobacter hormaechei ATCC 49619]                | 620.27       | 25.00%   | 7          | 18     | 376   | 41.1     | 5.24     |
| 2     | 1.2      | 206581075 | translation elongation factor Tu [Klebsiella pneumoniae 344]                         | 620.27       | 23.86%   | 7          | 18     | 394   | 43.2     | 5.53     |
| 3     | 2        | 334125929 | elongation factor G [Enterobacter hormaechei ATCC 49162]                             | 219.67       | 8.81%    | 4          | 4      | 704   | 77.5     | 5.34     |
| 4     | 3        | 334125399 | enolase [Enterobacter hormaechei ATCC 49162]                                         | 355.04       | 12.04%   | 4          | 6      | 432   | 45.6     | 5.31     |
| 5     | 4        | 334124376 | DNA-binding protein VicH [Enterobacter hormaechei ATCC 49162]                        | 82.49        | 10.22%   | 1          | 1      | 137   | 15.6     | 5.16     |
| 6     | 5        | 334123809 | chaperone GroEL [Enterobacter hormaechei ATCC 49162]                                 | 930.79       | 28.47%   | 12         | 21     | 548   | 57.1     | 4.94     |
| 7     | 6        | 334122625 | formate acetyltransferase [Enterobacter hormaechei ATCC 49162]                       | 224.84       | 7.76%    | 4          | 7      | 760   | 85       | 6.09     |
| 8     | 7.1      | 334122578 | outer membrane protein A [Enterobacter hormaechei ATCC 49162]                        | 104.29       | 3.35%    | 2          | 3      | 358   | 38.3     | 5.24     |
| 9     | 7.2      | 197284675 | outer membrane protein A [Proteus mirabilis HI4320]                                  | 104.29       | 3.31%    | 2          | 3      | 362   | 39       | 5.85     |
| 10    | 8.1      | 206579217 | ribosomal protein L2 [Klebsiella pneumoniae 342]                                     | 210.65       | 13.19%   | 3          | 5      | 273   | 29.8     | 10.93    |
| 11    | 8.2      | 334125920 | 50S ribosomal protein L2 [Enterobacter hormaechei ATCC 49162]                        | 210.65       | 13.19%   | 3          | 5      | 273   | 29.8     | 10.93    |
| 12    | 9.1      | 206578965 | ribosomal protein L29 [Klebsiella pneumoniae 342]                                    | 61.43        | 34.92%   | 1          | 1      | 63    | 7.2      | 10.27    |
| 13    | 9.2      | 334125915 | 50S ribosomal protein L29 [Enterobacter hormaechei ATCC 49162]                       | 61.43        | 34.92%   | 1          | 1      | 63    | 7.2      | 10.59    |
| 14    | 10       | 206576984 | outer membrane protein TolC [Klebsiella pneumoniae 344]                              | 157.23       | 7.74%    | 3          | 4      | 491   | 53.3     | 6.19     |
| 15    | 11.1     | 206578717 | fructose-bisphosphate aldolase [Klebsiella pneumoniae 344]                           | 68.59        | 11.42%   | 2          | 2      | 359   | 39.2     | 5.96     |
| 16    | 11.2     | 334125530 | fructose-bisphosphate aldolase [Enterobacter hormaechei ATCC 49162]                  | 68.59        | 11.42%   | 2          | 2      | 359   | 39.2     | 5.86     |
| 17    | 12       | 206580560 | autonomous glycol radical cofactor [Klebsiella pneumoniae 344]                       | 75.57        | 31.50%   | 2          | 2      | 127   | 14.2     | 5.02     |
| 18    | 13       | 206576322 | colicin I receptor [Klebsiella pneumoniae 342]                                       | 134.82       | 2.44%    | 1          | 2      | 657   | 73.1     | 5.41     |
| 19    | 14.1     | 206580610 | aldehyde-alcohol dehydrogenase [Klebsiella pneumoniae 344]                           | 396.76       | 8.64%    | 4          | 6      | 891   | 95.9     | 6.79     |
| 20    | 14.2     | 26247570  | bifunctional acetaldehyde-CoA/alcohol dehydrogenase [Escherichia coli CFT073]        | 396.76       | 8.64%    | 4          | 6      | 891   | 96.1     | 6.79     |
| 21    | 15       | 206576961 | quinone dehydrogenase (pyrroloquinoline-quinone) [Klebsiella pneumoniae 344]         | 80.25        | 2.41%    | 1          | 1      | 790   | 85       | 7.09     |
| 22    | 16.1     | 206577927 | NADP-specific glutamate dehydrogenase [Klebsiella pneumoniae 344]                    | 281.24       | 11.86%   | 3          | 5      | 447   | 48.5     | 7.01     |
| 23    | 16.2     | 334122327 | glutamate dehydrogenase [Enterobacter hormaechei ATCC 49162]                         | 281.24       | 11.86%   | 3          | 5      | 447   | 48.3     | 6.62     |
| 24    | 17       | 206580183 | glyceraldehyde-3-phosphate dehydrogenase (phosphorylase) [Klebsiella pneumoniae 344] | 185.13       | 15.11%   | 3          | 5      | 331   | 35.5     | 7.11     |
| 25    | 18.1     | 206577508 | outer membrane protein A [Klebsiella pneumoniae 342]                                 | 127.72       | 4.00%    | 1          | 2      | 350   | 37.4     | 6.25     |
| 26    | 18.2     | 26246978  | outer membrane protein A [Escherichia coli CFT073]                                   | 127.72       | 3.69%    | 1          | 2      | 379   | 41       | 6.71     |
| 27    | 19       | 206577432 | formate acetyltransferase [Klebsiella pneumoniae 342]                                | 338.73       | 10.00%   | 5          | 9      | 760   | 85.2     | 5.85     |
| 28    | 20.1     | 206576199 | alkyl hydroperoxide reductase subunit F [Klebsiella pneumoniae 344]                  | 87.51        | 4.61%    | 1          | 1      | 521   | 56       | 5.59     |
| 29    | 20.2     | 334122925 | alkyl hydroperoxide reductase [Enterobacter hormaechei ATCC 49162]                   | 87.51        | 4.61%    | 1          | 1      | 521   | 55.8     | 5.5      |
| 30    | 21.1     | 206577586 | alkyl hydroperoxide reductase subunit C [Klebsiella pneumoniae 344]                  | 132.91       | 17.11%   | 2          | 3      | 187   | 20.8     | 5.17     |
| 31    | 21.2     | 334122926 | alkyl hydroperoxide reductase C [Enterobacter hormaechei ATCC 49162]                 | 132.91       | 15.92%   | 2          | 3      | 201   | 22.4     | 5.02     |
| 32    | 21.3     | 26246586  | alkyl hydroperoxide reductase subunit C [Escherichia coli CFT073]                    | 132.91       | 17.11%   | 2          | 3      | 187   | 20.7     | 5.17     |
| 33    | 24       | 206576800 | antioxidant, AhpC/TSA family [Klebsiella pneumoniae 342]                             | 118.49       | 12.50%   | 2          | 3      | 200   | 22.3     | 5.29     |
| 34    | 25       | 206577768 | dihydrolypoyllysine-residue acetyltransferase [Klebsiella pneumoniae 344]            | 161.94       | 2.70%    | 1          | 2      | 630   | 65.7     | 5.31     |
| 35    | 26       | 206579361 | ribosomal protein S6 [Klebsiella pneumoniae 342]                                     | 109.96       | 14.50%   | 1          | 1      | 131   | 15.1     | 5.38     |
| 36    | 27.1     | 206580695 | DNA-binding protein HU, alpha subunit [Klebsiella pneumoniae 344]                    | 164.67       | 16.67%   | 1          | 2      | 90    | 9.5      | 9.58     |
| 37    | 27.2     | 334123929 | DNA-binding protein HU-beta [Enterobacter hormaechei ATCC 49162]                     | 164.67       | 16.67%   | 1          | 2      | 90    | 9.5      | 9.58     |
| 38    | 28.1     | 206578905 | DNA-directed RNA polymerase, beta' subunit [Klebsiella pneumoniae 344]               | 187.86       | 2.63%    | 2          | 3      | 1407  | 155.3    | 6.8      |
| 39    | 28.2     | 26250759  | DNA-directed RNA polymerase subunit beta' [Escherichia coli CFT073]                  | 187.86       | 2.63%    | 2          | 3      | 1407  | 155.1    | 7.08     |
| 40    | 29.1     | 206579488 | DNA-directed RNA polymerase, beta subunit [Klebsiella pneumoniae 344]                | 214.34       | 4.25%    | 3          | 4      | 1342  | 150.4    | 5.29     |
| 41    | 29.2     | 334123945 | DNA-directed RNA polymerase subunit beta [Enterobacter hormaechei ATCC 49162]        | 214.34       | 4.21%    | 3          | 4      | 1353  | 151.6    | 5.27     |
| 42    | 29.3     | 26250758  | DNA-directed RNA polymerase subunit beta [Escherichia coli CFT073]                   | 214.34       | 4.21%    | 3          | 4      | 1353  | 151.8    | 5.27     |
| 43    | 30.1     | 206577086 | ribosomal protein L10 [Klebsiella pneumoniae 342]                                    | 96.04        | 17.58%   | 2          | 2      | 165   | 17.8     | 8.98     |
| 44    | 30.2     | 334123947 | 50S ribosomal protein L10 [Enterobacter hormaechei ATCC 49162]                       | 96.04        | 17.58%   | 2          | 2      | 165   | 17.8     | 8.98     |
| 45    | 30.3     | 26250755  | 50S ribosomal protein L10 [Escherichia coli CFT073]                                  | 96.04        | 17.58%   | 2          | 2      | 165   | 17.7     | 8.98     |
| 46    | 31.1     | 206575827 | ATP synthase FO, B subunit [Klebsiella pneumoniae 342]                               | 230.53       | 9.62%    | 1          | 4      | 156   | 17.4     | 5.8      |
| 47    | 31.2     | 334121919 | ATP synthase FO sector subunit B [Enterobacter hormaechei ATCC 49162]                | 230.53       | 9.62%    | 1          | 4      | 156   | 17.4     | 5.8      |
| 48    | 32.1     | 206577341 | ATP synthase F1, beta subunit [Klebsiella pneumoniae 344]                            | 227.21       | 13.48%   | 5          | 6      | 460   | 50.2     | 5.03     |
| 49    | 32.2     | 334121923 | ATP synthase F1 sector beta subunit [Enterobacter hormaechei ATCC 49162]             | 227.21       | 13.48%   | 5          | 6      | 460   | 50.2     | 5        |
| 50    | 33.1     | 197285060 | NAD(P) transhydrogenase subunit alpha [Proteus mirabilis HI4320]                     | 169.17       | 3.34%    | 1          | 2      | 509   | 54.4     | 6.44     |
| 51    | 33.2     | 334122109 | NAD(P) transhydrogenase subunit alpha [Enterobacter hormaechei ATCC 49162]           | 169.17       | 3.19%    | 1          | 2      | 533   | 56.8     | 6.28     |
| 52    | 33.3     | 206576623 | NAD(P) transhydrogenase, alpha subunit [Klebsiella pneumoniae 344]                   | 169.17       | 3.31%    | 1          | 2      | 514   | 54.6     | 6.71     |
| 53    | 33.4     | 26247850  | NAD(P) transhydrogenase subunit alpha [Escherichia coli CFT073]                      | 169.17       | 3.22%    | 1          | 2      | 528   | 56.4     | 5.85     |
| 54    | 34       | 197286390 | 60 kDa chaperonin [Proteus mirabilis HI4320]                                         | 143.37       | 6.20%    | 2          | 4      | 548   | 57.6     | 4.89     |
| 55    | 35.1     | 197286887 | FOF1 ATP synthase subunit alpha [Proteus mirabilis HI4320]                           | 208.79       | 7.80%    | 3          | 4      | 513   | 55.5     | 5.69     |
| 56    | 35.2     | 206580919 | ATP synthase F1, alpha subunit [Klebsiella pneumoniae 344]                           | 208.79       | 7.80%    | 3          | 4      | 513   | 55.1     | 6        |
| 57    | 35.3     | 26250478  | FOF1 ATP synthase subunit alpha [Escherichia coli CFT073]                            | 208.79       | 7.80%    | 3          | 4      | 513   | 55.2     | 6.13     |
| 58    | 36.1     | 26246451  | transcriptional regulator HU subunit beta [Escherichia coli CFT073]                  | 95.57        | 16.67%   | 1          | 1      | 90    | 9.2      | 9.7      |
| 59    | 36.2     | 334123164 | DNA-binding protein HU-beta [Enterobacter hormaechei ATCC 49162]                     | 95.57        | 16.67%   | 1          | 1      | 90    | 9.1      | 9.77     |
| 60    | 37.1     | 26246936  | 30S ribosomal protein S1 [Escherichia coli CFT073]                                   | 106.29       | 7.54%    | 2          | 3      | 557   | 61.1     | 4.98     |
| 61    | 37.2     | 334122618 | 30S ribosomal protein S1 [Enterobacter hormaechei ATCC 49162]                        | 106.29       | 7.54%    | 2          | 3      | 557   | 61.2     | 4.98     |
| 62    | 38.1     | 26247927  | major outer membrane lipoprotein [Escherichia coli CFT073]                           | 176.06       | 30.77%   | 2          | 4      | 78    | 8.3      | 9.25     |
| 63    | 38.2     | 334122238 | major outer membrane lipoprotein [Enterobacter hormaechei ATCC 49162]                | 176.06       | 30.77%   | 2          | 4      | 78    | 8.4      | 9.31     |
| 64    | 39       | 26248038  | glyceraldehyde-3-phosphate dehydrogenase [Escherichia coli CFT073]                   | 123.37       | 8.38%    | 2          | 3      | 334   | 35.9     | 6.8      |
| 65    | 40       | 26249182  | phosphopyruvate hydratase [Escherichia coli CFT073]                                  | 417.5        | 13.19%   | 4          | 8      | 432   | 45.6     | 5.48     |
| 66    | 41.1     | 26249880  | DNA-directed RNA polymerase subunit alpha [Escherichia coli CFT073]                  | 242.37       | 18.54%   | 4          | 6      | 329   | 36.5     | 5.06     |
| 67    | 41.2     | 334125900 | DNA-directed RNA polymerase subunit alpha [Enterobacter hormaechei ATCC 49162]       | 242.37       | 18.54%   | 4          | 6      | 329   | 36.4     | 5.06     |

| index | Prot_hit | Accession | Description                                                 | Mascot Score | Coverage | # Peptides | # PSMs | # AAs | MW [kDa] | calc. pI |
|-------|----------|-----------|-------------------------------------------------------------|--------------|----------|------------|--------|-------|----------|----------|
| 68    | 42.1     | 161486053 | ketol-acid reductoisomerase [Escherichia coli CFT073]       | 78.13        | 6.92%    | 2          | 3      | 491   | 54       | 5.31     |
| 69    | 42.2     | 334121775 | ketol-acid reductoisomerase [Enterobacter hormaechei A      | 78.13        | 6.92%    | 2          | 3      | 491   | 54.1     | 5.25     |
| 70    | 42.3     | 206575721 | ketol-acid reductoisomerase [Klebsiella pneumoniae 342]     | 78.13        | 6.92%    | 2          | 3      | 491   | 54       | 5.38     |
| 71    | 43       | 26251035  | chaperonin GroEL [Escherichia coli CFT073]                  | 574.68       | 19.53%   | 9          | 15     | 548   | 57.3     | 4.94     |
| 72    | 44       | P04264    | Keratin, type II cytoskeletal 1 n=7 Tax=Eutheria RepID=K2   | 213.64       | 7.45%    | 4          | 6      | 644   | 66       | 8.12     |
| 73    | 45.1     | E9PFJ3    | Uncharacterized protein n=3 Tax=Simiiformes RepID=E9P       | 378.23       | 5.36%    | 2          | 5      | 578   | 63.3     | 5.31     |
| 74    | 45.2     | P07911    | Uromodulin n=2 Tax=Catarrhini RepID=UROM_HUMAN              | 378.23       | 4.84%    | 2          | 5      | 640   | 69.7     | 5.24     |
| 75    | 45.3     | Q5R5C1    | Uromodulin n=8 Tax=Simiiformes RepID=UROM_PONAB             | 378.23       | 4.84%    | 2          | 5      | 641   | 69.8     | 5.24     |
| 76    | 46.1     | B4DW52    | Uncharacterized protein n=12 Tax=Coelomata RepID=B4C        | 129.13       | 17.29%   | 3          | 3      | 347   | 38.6     | 5.35     |
| 77    | 46.2     | P63261    | Actin, cytoplasmic 2 n=1334 RepID=ACTG_HUMAN                | 129.13       | 16.00%   | 3          | 3      | 375   | 41.8     | 5.48     |
| 78    | 47.1     | P13646    | Keratin, type I cytoskeletal 13 n=13 Tax=Simiiformes Repl   | 857.7        | 29.91%   | 8          | 21     | 458   | 49.6     | 4.96     |
| 79    | 47.2     | P08727    | Keratin, type I cytoskeletal 19 n=9 Tax=Eutheria RepID=K1   | 356.14       | 6.25%    | 2          | 6      | 400   | 44.1     | 5.14     |
| 80    | 48.1     | B4DRW1    | cDNA FLJ55805, highly similar to Keratin, type II cytoskele | 647.41       | 21.73%   | 9          | 20     | 474   | 51.7     | 6.81     |
| 81    | 48.2     | P19013    | Keratin, type II cytoskeletal 4 n=14 Tax=Simiiformes Repl   | 647.41       | 19.29%   | 9          | 20     | 534   | 57.2     | 6.61     |
| 82    | 49       | F6RMN8    | Uncharacterized protein n=4 Tax=Simiiformes RepID=F6R       | 479.04       | 14.95%   | 8          | 17     | 535   | 57.8     | 8.22     |
| 83    | 50       | P04792    | Heat shock protein beta-1 n=6 Tax=Simiiformes RepID=HS      | 101.04       | 16.10%   | 2          | 2      | 205   | 22.8     | 6.4      |
| 84    | 51.1     | A8MX94    | Uncharacterized protein n=1 Tax=Homo sapiens RepID=A        | 180.75       | 9.20%    | 1          | 2      | 174   | 19.5     | 5.97     |
| 85    | 51.2     | P09211    | Glutathione S-transferase P n=4 Tax=Simiiformes RepID=C     | 180.75       | 7.62%    | 1          | 2      | 210   | 23.3     | 5.64     |
| 86    | 52       | E7EU87    | Uncharacterized protein n=3 Tax=Simiiformes RepID=E7E       | 265.42       | 10.99%   | 6          | 10     | 555   | 58.9     | 5.97     |
| 87    | 52.2     | P13647    | Keratin, type II cytoskeletal 5 n=17 Tax=Eutheria RepID=K   | 265.42       | 10.34%   | 6          | 10     | 590   | 62.3     | 7.74     |
| 88    | 53       | P04083    | Annexin A1 n=14 Tax=Eutheria RepID=ANXA1_HUMAN              | 742.81       | 38.44%   | 10         | 17     | 346   | 38.7     | 7.02     |







**2DLCS1\_34 Protein Summary**

| index | Prot_hit | Accession | Description                                  | Mascot Score | Coverage | # Peptides | # PSMs | # AAs | MW [kDa] | calc. pI |
|-------|----------|-----------|----------------------------------------------|--------------|----------|------------|--------|-------|----------|----------|
| 1     | 1.1      | 334126439 | translation elongation factor Tu [Enteroba   | 259.21       | 16.49%   | 5          | 8      | 376   | 41.1     | 5.24     |
| 2     | 1.2      | 206581075 | translation elongation factor Tu [Klebsiella | 259.21       | 15.74%   | 5          | 8      | 394   | 43.2     | 5.53     |
| 3     | 2.1      | 334125906 | 30S ribosomal protein S5 [Enterobacter hc    | 52.55        | 8.43%    | 1          | 1      | 166   | 17.5     | 10.05    |
| 4     | 2.2      | 206580716 | ribosomal protein S5 [Klebsiella pneumoni    | 52.55        | 8.38%    | 1          | 1      | 167   | 17.6     | 10.11    |
| 5     | 3        | 334124376 | DNA-binding protein VicH [Enterobacter h     | 93.41        | 10.22%   | 1          | 1      | 137   | 15.6     | 5.16     |
| 6     | 4        | 334123949 | 50S ribosomal protein L11 [Enterobacter h    | 100.95       | 9.86%    | 1          | 1      | 142   | 14.9     | 9.63     |
| 7     | 5        | 334123809 | chaperone GroEL [Enterobacter hormaech       | 774.57       | 30.11%   | 10         | 16     | 548   | 57.1     | 4.94     |
| 8     | 6.1      | 334123523 | chaperone DnaK [Enterobacter hormaech        | 62.89        | 2.35%    | 1          | 1      | 637   | 69.1     | 4.96     |
| 9     | 6.2      | 206580041 | chaperone protein DnaK [Klebsiella pneun     | 62.89        | 2.35%    | 1          | 1      | 638   | 69.1     | 4.97     |
| 10    | 6.3      | 26245936  | molecular chaperone DnaK [Escherichia cc     | 62.89        | 2.35%    | 1          | 1      | 638   | 69.1     | 4.97     |
| 11    | 7        | 334122625 | formate acetyltransferase [Enterobacter h    | 236.46       | 10.39%   | 5          | 6      | 760   | 85       | 6.09     |
| 12    | 8        | 334122578 | outer membrane protein A [Enterobacter       | 105.67       | 5.59%    | 2          | 3      | 358   | 38.3     | 5.24     |
| 13    | 9        | 206577432 | formate acetyltransferase [Klebsiella pneu   | 182.41       | 8.03%    | 4          | 5      | 760   | 85.2     | 5.85     |
| 14    | 10.1     | 206577586 | alkyl hydroperoxide reductase subunit C [I   | 117.43       | 17.11%   | 3          | 3      | 187   | 20.8     | 5.17     |
| 15    | 10.2     | 334122926 | alkyl hydroperoxide reductase C [Enteroba    | 117.43       | 15.92%   | 3          | 3      | 201   | 22.4     | 5.02     |
| 16    | 10.3     | 26246586  | alkyl hydroperoxide reductase subunit C [I   | 117.43       | 17.11%   | 3          | 3      | 187   | 20.7     | 5.17     |
| 17    | 11       | 206576800 | antioxidant, AhpC/TSA family [Klebsiella pi  | 68.79        | 7.00%    | 1          | 1      | 200   | 22.3     | 5.29     |
| 18    | 12.1     | 206576843 | pyruvate dehydrogenase (acetyl-transferri    | 86.71        | 1.92%    | 1          | 2      | 887   | 99.5     | 5.64     |
| 19    | 12.2     | 334123432 | pyruvate decarboxylase, E1 component of      | 86.71        | 1.92%    | 1          | 2      | 887   | 99.6     | 5.69     |
| 20    | 12.3     | 26246055  | pyruvate dehydrogenase subunit E1 [Eschi     | 86.71        | 1.92%    | 1          | 2      | 887   | 99.6     | 5.68     |
| 21    | 13.1     | 206580695 | DNA-binding protein HU, alpha subunit [KI    | 62.94        | 16.67%   | 1          | 1      | 90    | 9.5      | 9.58     |
| 22    | 13.2     | 334123929 | DNA-binding protein HU-beta [Enterobact      | 62.94        | 16.67%   | 1          | 1      | 90    | 9.5      | 9.58     |
| 23    | 14.1     | 197285345 | bifunctional acetaldehyde-CoA/alcohol de     | 87.63        | 2.14%    | 1          | 1      | 887   | 96.2     | 6.38     |
| 24    | 14.2     | 334124374 | aldehyde-alcohol dehydrogenase [Enterob      | 87.63        | 2.07%    | 1          | 1      | 920   | 99.1     | 6.81     |
| 25    | 14.3     | 206580610 | aldehyde-alcohol dehydrogenase [Klebsiel     | 87.63        | 2.13%    | 1          | 1      | 891   | 95.9     | 6.79     |
| 26    | 14.4     | 26247570  | bifunctional acetaldehyde-CoA/alcohol de     | 87.63        | 2.13%    | 1          | 1      | 891   | 96.1     | 6.79     |
| 27    | 15       | 197286390 | 60 kDa chaperonin [Proteus mirabilis HI43    | 158.69       | 8.39%    | 2          | 4      | 548   | 57.6     | 4.89     |
| 28    | 16.1     | 197286616 | 50S ribosomal protein L10 [Proteus mirabi    | 104.53       | 7.88%    | 1          | 2      | 165   | 17.6     | 8.68     |
| 29    | 16.2     | 334123947 | 50S ribosomal protein L10 [Enterobacter h    | 104.53       | 7.88%    | 1          | 2      | 165   | 17.8     | 8.98     |
| 30    | 16.3     | 206577086 | ribosomal protein L10 [Klebsiella pneumoi    | 104.53       | 7.88%    | 1          | 2      | 165   | 17.8     | 8.98     |
| 31    | 16.4     | 26250755  | 50S ribosomal protein L10 [Escherichia col   | 104.53       | 7.88%    | 1          | 2      | 165   | 17.7     | 8.98     |
| 32    | 17.1     | 197286887 | FOF1 ATP synthase subunit alpha [Proteus     | 227.1        | 2.53%    | 1          | 3      | 513   | 55.5     | 5.69     |
| 33    | 17.2     | 334121921 | ATP synthase F1 sector alpha subunit [Ent    | 227.1        | 2.53%    | 1          | 3      | 513   | 55.3     | 6.13     |
| 34    | 17.3     | 206580919 | ATP synthase F1, alpha subunit [Klebsiella   | 227.1        | 2.53%    | 1          | 3      | 513   | 55.1     | 6        |
| 35    | 17.4     | 26250478  | FOF1 ATP synthase subunit alpha [Escheric    | 227.1        | 2.53%    | 1          | 3      | 513   | 55.2     | 6.13     |
| 36    | 18.1     | 197287068 | 50S ribosomal protein L3 [Proteus mirabili   | 84.35        | 9.09%    | 1          | 2      | 209   | 22.5     | 9.86     |
| 37    | 18.2     | 334125923 | 50S ribosomal protein L3 [Enterobacter hc    | 84.35        | 9.09%    | 1          | 2      | 209   | 22.2     | 9.82     |
| 38    | 18.3     | 206576036 | ribosomal protein L3 [Klebsiella pneumoni    | 84.35        | 9.09%    | 1          | 2      | 209   | 22.2     | 9.91     |
| 39    | 18.4     | 26249915  | 50S ribosomal protein L3 [Escherichia coli   | 84.35        | 9.09%    | 1          | 2      | 209   | 22.2     | 9.91     |
| 40    | 19.1     | 197287127 | transcription termination factor Rho [Prot   | 87.39        | 5.25%    | 1          | 1      | 419   | 46.9     | 7.25     |
| 41    | 19.2     | 334126167 | transcription termination factor Rho [Ente   | 87.39        | 5.25%    | 1          | 1      | 419   | 47       | 7.25     |
| 42    | 19.3     | 206576949 | transcription termination factor Rho [Kleb   | 87.39        | 5.25%    | 1          | 1      | 419   | 47       | 7.25     |
| 43    | 19.4     | 26250521  | transcription termination factor Rho [Esch   | 87.39        | 4.97%    | 1          | 1      | 443   | 49.6     | 7.3      |
| 44    | 20.1     | 161486147 | autonomous glycyl radical cofactor GrcA [I   | 244.8        | 16.54%   | 1          | 3      | 127   | 14.3     | 5.17     |
| 45    | 20.2     | 206580560 | autonomous glycyl radical cofactor [Klebsi   | 244.8        | 16.54%   | 1          | 3      | 127   | 14.2     | 5.02     |
| 46    | 21       | 26249182  | phosphopyruvate hydratase [Escherichia c     | 227.61       | 13.19%   | 3          | 4      | 432   | 45.6     | 5.48     |
| 47    | 22       | P35579    | Myosin-9 n=67 Tax=Tetrapoda RepID=MYI        | 185.28       | 2.45%    | 3          | 4      | 1960  | 226.4    | 5.6      |
| 48    | 23       | P15924    | Desmoplakin n=28 Tax=Mammalia RepID=         | 76.4         | 0.45%    | 1          | 1      | 2871  | 331.6    | 6.81     |
| 49    | 24       | P04264    | Keratin, type II cytoskeletal 1 n=7 Tax=Euti | 1746.82      | 28.11%   | 14         | 35     | 644   | 66       | 8.12     |
| 50    | 25       | P35527    | Keratin, type I cytoskeletal 9 n=4 Tax=Cata  | 96.6         | 6.42%    | 2          | 3      | 623   | 62       | 5.24     |
| 51    | 26       | P13645    | Keratin, type I cytoskeletal 10 n=12 Tax=Et  | 240.51       | 15.41%   | 6          | 7      | 584   | 58.8     | 5.21     |
| 52    | 27       | P02533    | Keratin, type I cytoskeletal 14 n=8 Tax=Eut  | 317.41       | 11.23%   | 5          | 10     | 472   | 51.5     | 5.16     |
| 53    | 28       | Q7RTS7    | Keratin, type II cytoskeletal 74 n=7 Tax=Sir | 373.36       | 6.81%    | 3          | 14     | 529   | 57.8     | 7.71     |
| 54    | 29       | P06702    | Protein S100-A9 n=5 Tax=Hominoidea Rep       | 121.49       | 24.56%   | 2          | 3      | 114   | 13.2     | 6.13     |
| 55    | 30       | O60437    | Periplakin n=3 Tax=Hominoidea RepID=PE       | 126.93       | 1.99%    | 2          | 2      | 1756  | 204.6    | 5.6      |
| 56    | 31       | P62937    | Peptidyl-prolyl cis-trans isomerase A n=98   | 108.16       | 9.09%    | 1          | 2      | 165   | 18       | 7.81     |
| 57    | 32.1     | E9PFJ3    | Uncharacterized protein n=3 Tax=Simiiforr    | 235.29       | 5.02%    | 2          | 4      | 578   | 63.3     | 5.31     |
| 58    | 32.2     | P07911    | Uromodulin n=2 Tax=Catarrhini RepID=UR       | 235.29       | 4.53%    | 2          | 4      | 640   | 69.7     | 5.24     |
| 59    | 33       | A4FU1     | GUCA1B protein (Fragment) n=1 Tax=Hom        | 1314.14      | 58.67%   | 3          | 24     | 75    | 8.6      | 5.41     |
| 60    | 34       | P13646    | Keratin, type I cytoskeletal 13 n=13 Tax=Si  | 2129.98      | 34.06%   | 12         | 55     | 458   | 49.6     | 4.96     |
| 61    | 35.1     | B4DRW1    | cDNA FLJ55805, highly similar to Keratin, t  | 1113.26      | 24.05%   | 11         | 33     | 474   | 51.7     | 6.81     |
| 62    | 35.2     | P19013    | Keratin, type II cytoskeletal 4 n=14 Tax=Sir | 1113.26      | 21.35%   | 11         | 33     | 534   | 57.2     | 6.61     |
| 63    | 36       | F6RMN8    | Uncharacterized protein n=4 Tax=Simiiforr    | 607.51       | 13.46%   | 7          | 23     | 535   | 57.8     | 8.22     |

| index | Prot_hit | Accession     | Description                                 | Score  | Coverage | # Peptides | # PSMs | # AAs | MW [kDa] | calc. pI |
|-------|----------|---------------|---------------------------------------------|--------|----------|------------|--------|-------|----------|----------|
| 64    | 37.1     | P06899        | Histone H2B type 1-J n=102 Tax=Euteleost    | 98.7   | 11.90%   | 1          | 1      | 126   | 13.9     | 10.32    |
| 65    | 37.2     | P62807        | Histone H2B type 1-C/E/F/G/I n=44 Tax=Eu    | 98.7   | 11.90%   | 1          | 1      | 126   | 13.9     | 10.32    |
| 66    | 37.3     | B4DR52        | Histone H2B n=5 Tax=Euarchoptoglyres Re     | 98.7   | 9.04%    | 1          | 1      | 166   | 18       | 10.32    |
| 67    | 37.4     | P58876        | Histone H2B type 1-D n=136 Tax=Coeloma      | 98.7   | 11.90%   | 1          | 1      | 126   | 13.9     | 10.32    |
| 68    | 38.1     | UPI0000D48568 | UPI0000D48568 related cluster n=1 Tax=H     | 116.71 | 13.98%   | 2          | 3      | 186   | 20.4     | 9.06     |
| 69    | 38.2     | P04792        | Heat shock protein beta-1 n=6 Tax=Simiifc   | 116.71 | 12.68%   | 2          | 3      | 205   | 22.8     | 6.4      |
| 70    | 39.1     | A8MX94        | Uncharacterized protein n=1 Tax=Homo s      | 132.02 | 9.20%    | 1          | 1      | 174   | 19.5     | 5.97     |
| 71    | 39.2     | P09211        | Glutathione S-transferase P n=4 Tax=Simii   | 132.02 | 7.62%    | 1          | 1      | 210   | 23.3     | 5.64     |
| 72    | 40.1     | E7EU87        | Uncharacterized protein n=3 Tax=Simiifor    | 422.23 | 7.03%    | 4          | 17     | 555   | 58.9     | 5.97     |
| 73    | 40.2     | P13647        | Keratin, type II cytoskeletal 5 n=17 Tax=Eu | 422.23 | 6.61%    | 4          | 17     | 590   | 62.3     | 7.74     |
| 74    | 41       | P04083        | Annexin A1 n=14 Tax=Eutheria RepID=AN       | 939.97 | 27.75%   | 8          | 19     | 346   | 38.7     | 7.02     |
| 75    | 42.1     | Q7KZ86        | Plakoglobin (Fragment) n=1 Tax=Homo sa      | 48.53  | 9.94%    | 1          | 1      | 171   | 18.8     | 8.85     |
| 76    | 42.2     | P14923        | Junction plakoglobin n=31 Tax=Theria Rep    | 48.53  | 2.28%    | 1          | 1      | 745   | 81.7     | 6.14     |
| 77    | 43.1     | B4DVJ0        | Glucose-6-phosphate isomerase n=2 Tax=      | 75.31  | 3.20%    | 1          | 1      | 531   | 60       | 8.65     |
| 78    | 43.2     | B4DG39        | Glucose-6-phosphate isomerase n=5 Tax=      | 75.31  | 2.99%    | 1          | 1      | 569   | 64.3     | 8.91     |
| 79    | 43.3     | P06744        | Glucose-6-phosphate isomerase n=17 Tax      | 75.31  | 3.05%    | 1          | 1      | 558   | 63.1     | 8.32     |
| 80    | 44       | Q9UBG3        | Cornulin n=6 Tax=Catarrhini RepID=CRNN      | 59.98  | 3.23%    | 1          | 1      | 495   | 53.5     | 6.1      |
| 81    | 45.1     | Q96GV1        | Enolase (Fragment) n=2 Tax=Eutheria Rep     | 123.98 | 6.52%    | 1          | 3      | 184   | 20.4     | 7.03     |
| 82    | 45.2     | P06733        | Alpha-enolase n=53 Tax=Euteleostomi Rep     | 123.98 | 2.76%    | 1          | 3      | 434   | 47.1     | 7.39     |



| Sequence                      | Protein Descriptions                                      | # Proteins | # Protein Groups | Protein Group Accessions | Modifications  | q-Value | PEP      | Charge | m/z [Da]   | MH+ [Da]   | Delta Mass [Da] |
|-------------------------------|-----------------------------------------------------------|------------|------------------|--------------------------|----------------|---------|----------|--------|------------|------------|-----------------|
| RVLEALQQAEEELAR               | cDNA FLJ55805, highly similar to Keratin, type II cytoske | 2          | 1                | B4DRW1                   |                | 0       | 4.09E-13 | 2      | 977.91992  | 1954.83257 | 0.38            |
| ELLSQYDFPGDDTPIVR             | translation elongation factor Tu [Enterobacter hormae     | 2          | 1                | 334126439                |                | 0       | 2.39E-08 | 2      | 983.00964  | 1965.01201 | 0.03            |
| LDSELKNMQDMVEDYR              | Keratin, type II cytoskeletal 1 n=7 Tax=Eutheria RepID=   | 1          | 1                | P04264                   |                | 0       | 2.40E-06 | 2      | 993.95605  | 1986.90483 | 0.51            |
| THNLEPYFESFINLR               | Keratin, type II cytoskeletal 1 n=7 Tax=Eutheria RepID=   | 1          | 1                | P04264                   |                | 0       | 7.73E-07 | 2      | 997.97949  | 1994.95171 | 0.49            |
| EIELEDKFNMGAAQMVK             | chaperone GroEL [Enterobacter hormaechei ATCC 491f        | 2          | 2                | 334123809;197286390      |                | 0       | 2.41E-07 | 2      | 1006.45813 | 2011.90898 | 0.48            |
| ILINTPASGGGIGDLYNFK           | bifunctional acetaldehyde-CoA/alcohol dehydrogenase       | 4          | 1                | 197285345                |                | 0       | 5.75E-14 | 2      | 1011.48279 | 2021.9583  | 0.44            |
| DWILQIESVREEGVGR              | pyruvate dehydrogenase (acetyl-transferring), homodir     | 3          | 1                | 206576843                |                | 0       | 1.92E-06 | 3      | 677.44177  | 2030.31076 | 0.43            |
| AMAGLQPLQPEELDAMIR            | Calmodulin-like protein 5 n=4 Tax=Hominidae RepID=C       | 1          | 1                | Q9NZ11                   |                | 0       | 0.00011  | 2      | 1020.89868 | 2040.79009 | 0.38            |
| SAELNKEVSTNTAMIQTSK           | GUCA1B protein (Fragment) n=1 Tax=Homo sapiens Re         | 2          | 2                | A4FUAI,P13646            |                | 0       | 2.29E-11 | 2      | 1026.96497 | 2052.92266 | 0.45            |
| VLDEKLLVLEADAAIAK             | Periplakin n=3 Tax=Hominoidea RepID=PEPL_HUMAN            | 1          | 1                | O60437                   |                | 0       | 1.53E-06 | 2      | 1031.72595 | 2062.44463 | 0.65            |
| GDRSEDFGVNEDLADSDAR           | Annexin A1 n=14 Tax=Eutheria RepID=ANXA1_HUMAN            | 1          | 1                | P04083                   |                | 0       | 3.28E-12 | 2      | 1034.8761  | 2068.74492 | 0.43            |
| SAELNKEVSTNTAMIQTSK           | GUCA1B protein (Fragment) n=1 Tax=Homo sapiens Re         | 2          | 2                | A4FUAI,P13646            | M14(Oxidation) | 0       | 2.44E-11 | 2      | 1035.03198 | 2069.05669 | 0.52            |
| VLGDKIQLVGGDLVFNNTK           | phosphopyruvate hydratase [Escherichia coli CFT073]       | 1          | 1                | 26249182                 |                | 0       | 2.75E-06 | 2      | 1038.73987 | 2076.47246 | 0.67            |
| SGETEDATIADLAVGTAAGQIK        | phosphopyruvate hydratase [Escherichia coli CFT073]       | 1          | 1                | 26249182                 |                | 0       | 1.36E-09 | 2      | 1060.07532 | 2119.14336 | 0.54            |
| FNNFINDSLEGAVDALER            | 6,7-dimethyl-8-ribityllumazine synthase [Proteus mirab    | 1          | 1                | 197283995                |                | 0       | 0.0811   | 3      | 713.28564  | 2137.84238 | 0.26            |
| QAWFIEEEQYVQTVK               | Annexin A1 n=14 Tax=Eutheria RepID=ANXA1_HUMAN            | 1          | 1                | P04083                   |                | 0       | 3.17E-10 | 2      | 1071.49963 | 2141.99199 | 0.49            |
| NKLNDELALQQAEDLAR             | Keratin, type II cytoskeletal 1 n=7 Tax=Eutheria RepID=   | 1          | 1                | P04264                   |                | 0       | 5.23E-13 | 2      | 1092.97839 | 2184.94951 | 0.41            |
| NVTPYEGDESFLAGADATTK          | formate acetyltransferase [Enterobacter hormaechei A'     | 1          | 1                | 334122625                |                | 0       | 1.27E-13 | 2      | 1126.57434 | 2252.14141 | 0.57            |
| NVVLDKSGFAPITTKDGVSVAR        | chaperone GroEL [Enterobacter hormaechei ATCC 491f        | 1          | 1                | 334123809                |                | 0       | 4.53E-09 | 3      | 759.16864  | 2275.49137 | 0.42            |
| AEAESYQSQYEELQITAGR           | Keratin, type II cytoskeletal 1 n=7 Tax=Eutheria RepID=   | 1          | 1                | P04264                   |                | 0       | 2.56E-09 | 2      | 1144.06421 | 2287.12114 | 0.5             |
| TDLEMQIESLNEELAYMKK           | Keratin, type I cytoskeletal 13 n=13 Tax=Simiiformes Re   | 1          | 1                | P13646                   |                | 0       | 2.76E-06 | 3      | 762.80658  | 2286.40519 | 0.43            |
| EMLLDAMENPEKYPQLTIR           | formate acetyltransferase [Klebsiella pneumoniae 342]     | 1          | 1                | 206577432                |                | 0       | 2.14E-06 | 2      | 1146.54163 | 2292.07598 | 0.47            |
| AANDLLNSFWLLEDSEKGEAR         | autonomous glycol radical cofactor GrCA [Escherichia ct   | 2          | 1                | 161486147                |                | 0       | 2.27E-11 | 2      | 1183.07288 | 2365.13848 | 0.5             |
| GGGGGGYSGSGSSYSGGGYSGGGGGGGGR | Keratin, type II cytoskeletal 1 n=7 Tax=Eutheria RepID=   | 1          | 1                | P04264                   |                | 0       | 1.70E-17 | 2      | 1192.90918 | 2384.81108 | 0.43            |
| SGEDIFGGVLEILQDGFGLR          | transcription termination factor Rho [Proteus mirabilis   | 4          | 1                | 197287127                |                | 0       | 1.03E-10 | 2      | 1192.9939  | 2384.98052 | 0.4             |
| VVINKDITTIIDGVGEEAAIQGR       | chaperone GroEL [Enterobacter hormaechei ATCC 491f        | 1          | 1                | 334123809                |                | 0       | 2.75E-12 | 2      | 1200.57678 | 2400.14629 | 0.43            |
| NLDLSIAEVAQYEEIAQR            | Uncharacterized protein n=4 Tax=Simiiformes RepID=Fi      | 1          | 1                | F6RMN8                   |                | 0       | 1.48E-10 | 2      | 1210.02209 | 2419.03691 | 0.39            |
| RKAEAESLYQSKYELQITAGR         | Keratin, type II cytoskeletal 1 n=7 Tax=Eutheria RepID=   | 1          | 1                | P04264                   |                | 0       | 5.86E-11 | 2      | 1251.42273 | 2501.83818 | 0.29            |
| RVVINKDITTIIDGVGEEAAIQGR      | chaperone GroEL [Enterobacter hormaechei ATCC 491f        | 1          | 1                | 334123809                |                | 0       | 4.54E-09 | 3      | 852.92786  | 2556.76902 | 0.46            |
| VDQLSNDVNmRSDVQAAKDDAAR       | major outer membrane lipoprotein [Escherichia coli CF     | 2          | 1                | 26247927                 | M11(Oxidation) | 0       | 0.000798 | 3      | 869.52112  | 2606.5488  | 0.44            |
| TLTIADNGIMNRDEVIDHLGTIAK      | chaperone HtpG [Enterobacter hormaechei ATCC 491f.        | 1          | 1                | 334123123                |                | 0       | 0.0115   | 3      | 890.22485  | 2668.66001 | 0.43            |
| NYSPPYNTIDDLQDQIVDLTVGNKK     | Keratin, type I cytoskeletal 9 n=4 Tax=Catarrhini RepID=  | 1          | 1                | P35527                   |                | 0       | 5.38E-06 | 3      | 968.46912  | 2903.3928  | 0.33            |
| NLDLSIAEVAQYEEIAQR            | chaperone GroEL [Enterobacter hormaechei ATCC 491f        | 1          | 1                | 334123809                |                | 0       | 3.53E-06 | 3      | 973.11487  | 2917.33005 | 0.27            |
| AIAQGVGISANSDETGTIAQAmEKVKG   | 60 Kda chaperonin [Proteus mirabilis HI4320]              | 1          | 1                | 197286390                | M24(Oxidation) | 0       | 0.0872   | 3      | 973.41028  | 2918.21628 | -0.1            |
| TIDDLKNQILNLTDMANILLQDANAR    | Keratin, type I cytoskeletal 10 n=12 Tax=Eutheria RepID   | 1          | 1                | P13645                   |                | 0       | 1.52E-10 | 3      | 1018.59094 | 3053.75827 | 0.38            |
| VGKGVITVEDGTGLDELDVVEGMQFDR   | chaperone GroEL [Enterobacter hormaechei ATCC 491f        | 1          | 1                | 334123809                |                | 0       | 2.19E-10 | 3      | 1046.57861 | 3137.72129 | 0.41            |
| VLELDSKTDLEmQIESLNEELAYMKK    | Keratin, type I cytoskeletal 13 n=13 Tax=Simiiformes Re   | 1          | 1                | P13646                   | M14(Oxidation) | 0       | 2.25E-13 | 3      | 1101.00439 | 3300.99863 | 0.45            |
| AGEGNYNAATEEYGNMIDFGILDPTKVTR | chaperone GroEL [Enterobacter hormaechei ATCC 491f        | 1          | 1                | 334123809                |                | 0       | 1.75E-13 | 3      | 1123.30396 | 3367.89731 | 0.45            |

**2DLCSCI\_39 Protein Summary**

| index | Prot_hit | Accession | Description                                | Mascot Score | Coverage | # Peptides | # PSMs | # AAs | MW [kDa] | calc. pI |
|-------|----------|-----------|--------------------------------------------|--------------|----------|------------|--------|-------|----------|----------|
| 1     | 1.1      | 206579217 | ribosomal protein L2 [Klebsiella pneumo    | 96.33        | 8.06%    | 2          | 2      | 273   | 29.8     | 10.93    |
| 2     | 1.2      | 334125920 | 50S ribosomal protein L2 [Enterobacter     | 96.33        | 8.06%    | 2          | 2      | 273   | 29.8     | 10.93    |
| 3     | 2.1      | 206578965 | ribosomal protein L29 [Klebsiella pneumo   | 95.74        | 34.92%   | 2          | 2      | 63    | 7.2      | 10.27    |
| 4     | 2.2      | 334125915 | 50S ribosomal protein L29 [Enterobacter    | 95.74        | 34.92%   | 2          | 2      | 63    | 7.2      | 10.59    |
| 5     | 3        | 206577508 | outer membrane protein A [Klebsiella pr    | 208.59       | 7.43%    | 2          | 5      | 350   | 37.4     | 6.25     |
| 6     | 4.1      | 206580559 | ribosomal protein S1 [Klebsiella pneumo    | 235.33       | 10.41%   | 3          | 4      | 557   | 61.1     | 4.98     |
| 7     | 4.2      | 334122618 | 30S ribosomal protein S1 [Enterobacter     | 235.33       | 10.41%   | 3          | 4      | 557   | 61.2     | 4.98     |
| 8     | 4.3      | 26246936  | 30S ribosomal protein S1 [Escherichia cc   | 235.33       | 10.41%   | 3          | 4      | 557   | 61.1     | 4.98     |
| 9     | 5.1      | 206577586 | alkyl hydroperoxide reductase subunit C    | 82.84        | 8.56%    | 1          | 1      | 187   | 20.8     | 5.17     |
| 10    | 5.2      | 334122926 | alkyl hydroperoxide reductase C [Entero    | 82.84        | 7.96%    | 1          | 1      | 201   | 22.4     | 5.02     |
| 11    | 5.3      | 26246586  | alkyl hydroperoxide reductase subunit C    | 82.84        | 8.56%    | 1          | 1      | 187   | 20.7     | 5.17     |
| 12    | 6.1      | 206575727 | trigger factor [Klebsiella pneumoniae 34   | 81.04        | 6.25%    | 2          | 2      | 432   | 48       | 4.89     |
| 13    | 6.2      | 334123168 | trigger factor [Enterobacter hormaechei    | 81.04        | 6.25%    | 2          | 2      | 432   | 48.1     | 4.87     |
| 14    | 6.3      | 26246446  | trigger factor [Escherichia coli CFT073]   | 81.04        | 6.25%    | 2          | 2      | 432   | 48.2     | 4.86     |
| 15    | 7        | 206577504 | ribosomal protein L9 [Klebsiella pneumo    | 117.33       | 20.13%   | 2          | 5      | 149   | 15.7     | 6.58     |
| 16    | 8        | 206579361 | ribosomal protein S6 [Klebsiella pneumo    | 302.23       | 35.11%   | 4          | 7      | 131   | 15.1     | 5.38     |
| 17    | 9        | 206581075 | translation elongation factor Tu [Klebsie  | 381.16       | 16.50%   | 4          | 8      | 394   | 43.2     | 5.53     |
| 18    | 10.1     | 197287068 | 50S ribosomal protein L3 [Proteus mirab    | 260.45       | 9.09%    | 2          | 6      | 209   | 22.5     | 9.86     |
| 19    | 10.2     | 334125923 | 50S ribosomal protein L3 [Enterobacter     | 260.45       | 9.09%    | 2          | 6      | 209   | 22.2     | 9.82     |
| 20    | 10.3     | 206576036 | ribosomal protein L3 [Klebsiella pneumo    | 260.45       | 9.09%    | 2          | 6      | 209   | 22.2     | 9.91     |
| 21    | 10.4     | 26249915  | 50S ribosomal protein L3 [Escherichia cc   | 260.45       | 9.09%    | 2          | 6      | 209   | 22.2     | 9.91     |
| 22    | 11.1     | 197287073 | 50S ribosomal protein L22 [Proteus mira    | 73.54        | 22.73%   | 1          | 1      | 110   | 12.1     | 10.18    |
| 23    | 11.2     | 334125918 | 50S ribosomal protein L22 [Enterobacter    | 73.54        | 22.73%   | 1          | 1      | 110   | 12.2     | 10.18    |
| 24    | 12.1     | 197287127 | transcription termination factor Rho [Pri  | 98.47        | 5.25%    | 1          | 1      | 419   | 46.9     | 7.25     |
| 25    | 12.2     | 334126167 | transcription termination factor Rho [En   | 98.47        | 5.25%    | 1          | 1      | 419   | 47       | 7.25     |
| 26    | 12.3     | 206576949 | transcription termination factor Rho [Kle  | 98.47        | 5.25%    | 1          | 1      | 419   | 47       | 7.25     |
| 27    | 12.4     | 26250521  | transcription termination factor Rho [Esi  | 98.47        | 4.97%    | 1          | 1      | 443   | 49.6     | 7.3      |
| 28    | 13.1     | 26247927  | major outer membrane lipoprotein [Escl     | 182.06       | 30.77%   | 2          | 4      | 78    | 8.3      | 9.25     |
| 29    | 13.2     | 334122238 | major outer membrane lipoprotein [Ent      | 182.06       | 30.77%   | 2          | 4      | 78    | 8.4      | 9.31     |
| 30    | 14       | 161486111 | ATP-dependent RNA helicase DeaD [Escl      | 89.92        | 2.70%    | 1          | 1      | 629   | 70.5     | 8.72     |
| 31    | 15.1     | 26249880  | DNA-directed RNA polymerase subunit ε      | 68.74        | 7.29%    | 1          | 1      | 329   | 36.5     | 5.06     |
| 32    | 15.2     | 334125900 | DNA-directed RNA polymerase subunit ε      | 68.74        | 7.29%    | 1          | 1      | 329   | 36.4     | 5.06     |
| 33    | 16       | P04264    | Keratin, type II cytoskeletal 1 n=7 Tax=El | 108.01       | 4.81%    | 1          | 1      | 644   | 66       | 8.12     |
| 34    | 17.1     | P08727    | Keratin, type I cytoskeletal 19 n=9 Tax=E  | 209.23       | 8.75%    | 2          | 3      | 400   | 44.1     | 5.14     |
| 35    | 17.2     | B4DE59    | cDNA FLJ60424, highly similar to Junctio   | 209.23       | 6.22%    | 2          | 3      | 563   | 62.6     | 5.17     |
| 36    | 18       | O60437    | Periplakin n=3 Tax=Hominoidea RepID=I      | 82.43        | 0.85%    | 1          | 1      | 1756  | 204.6    | 5.6      |
| 37    | 19.1     | E9PFJ3    | Uncharacterized protein n=3 Tax=Simiifc    | 101.07       | 2.77%    | 1          | 1      | 578   | 63.3     | 5.31     |
| 38    | 19.2     | P07911    | Uromodulin n=2 Tax=Catarrhini RepID=L      | 101.07       | 2.50%    | 1          | 1      | 640   | 69.7     | 5.24     |
| 39    | 19.3     | Q5R5C1    | Uromodulin n=8 Tax=Simiiformes RepID       | 101.07       | 2.50%    | 1          | 1      | 641   | 69.8     | 5.24     |
| 40    | 20       | A4FUA1    | GUCA1B protein (Fragment) n=1 Tax=Hc       | 475.45       | 58.67%   | 3          | 8      | 75    | 8.6      | 5.41     |
| 41    | 21.1     | P13646-3  | Isoform 3 of Keratin, type I cytoskeletal  | 685.04       | 22.86%   | 8          | 21     | 420   | 45.8     | 4.88     |
| 42    | 21.2     | P13646    | Keratin, type I cytoskeletal 13 n=13 Tax=  | 685.04       | 20.96%   | 8          | 21     | 458   | 49.6     | 4.96     |
| 43    | 22.1     | B4DRW1    | cDNA FLJ55805, highly similar to Keratin   | 570.84       | 20.46%   | 8          | 17     | 474   | 51.7     | 6.81     |
| 44    | 22.2     | P19013    | Keratin, type II cytoskeletal 4 n=14 Tax=! | 570.84       | 18.16%   | 8          | 17     | 534   | 57.2     | 6.61     |
| 45    | 23.1     | E7EUE8    | Uncharacterized protein n=14 Tax=Euthi     | 622.1        | 16.54%   | 8          | 20     | 520   | 55.8     | 6.27     |
| 46    | 23.2     | P02538    | Keratin, type II cytoskeletal 6A n=25 Tax  | 622.1        | 15.25%   | 8          | 20     | 564   | 60       | 8        |
| 47    | 24.1     | C9JZN1    | Uncharacterized protein n=5 Tax=Catarr     | 84.39        | 11.84%   | 2          | 3      | 152   | 17       | 9.13     |
| 48    | 24.2     | P62879    | Guanine nucleotide-binding protein G(I)    | 84.39        | 5.29%    | 2          | 3      | 340   | 37.3     | 6        |
| 49    | 25       | P04792    | Heat shock protein beta-1 n=6 Tax=Simi     | 92.57        | 16.10%   | 2          | 2      | 205   | 22.8     | 6.4      |
| 50    | 26.1     | E7EU87    | Uncharacterized protein n=3 Tax=Simiifc    | 414.57       | 8.47%    | 4          | 11     | 555   | 58.9     | 5.97     |
| 51    | 26.2     | P13647    | Keratin, type II cytoskeletal 5 n=17 Tax=! | 414.57       | 7.97%    | 4          | 11     | 590   | 62.3     | 7.74     |
| 52    | 27       | P04083    | Annexin A1 n=14 Tax=Eutheria RepID=A       | 688.06       | 31.79%   | 8          | 13     | 346   | 38.7     | 7.02     |
| 53    | 28.1     | Q96KK5    | Histone H2A type 1-H n=10 Tax=Mamm         | 79.38        | 14.06%   | 2          | 2      | 128   | 13.9     | 10.89    |
| 54    | 28.2     | P0C0S8    | Histone H2A type 1 n=295 Tax=Eukaryot      | 79.38        | 13.85%   | 2          | 2      | 130   | 14.1     | 10.9     |
| 55    | 28.3     | Q16777    | Histone H2A type 2-C n=33 Tax=Eumeta.      | 79.38        | 13.95%   | 2          | 2      | 129   | 14       | 10.9     |
| 56    | 28.4     | C9JE22    | Histone H2A n=7 Tax=Eutheria RepID=C!      | 79.38        | 11.92%   | 2          | 2      | 151   | 16.1     | 10.23    |
| 57    | 28.5     | Q99878    | Histone H2A type 1-J n=4 Tax=Eutheria F    | 79.38        | 14.06%   | 2          | 2      | 128   | 13.9     | 10.89    |
| 58    | 29       | Q9UBG3    | Cornulin n=6 Tax=Catarrhini RepID=CRN      | 125.62       | 3.23%    | 1          | 2      | 495   | 53.5     | 6.1      |





**2DLCSCI\_33 Protein Summary**

| <b>index</b> | <b>Prot_hit</b> | <b>Accession</b> | <b>Description</b>           | <b>Mascot Score</b> | <b>Coverage</b> | <b># Peptides</b> | <b># PSMs</b> | <b># AAs</b> | <b>MW [kDa]</b> | <b>calc. pI</b> |
|--------------|-----------------|------------------|------------------------------|---------------------|-----------------|-------------------|---------------|--------------|-----------------|-----------------|
| 1            | 1               | P35579           | Myosin-9 n=67 Tax=Tetrapoda  | 442.23              | 4.29%           | 6                 | 9             | 1960         | 226.4           | 5.6             |
| 2            | 2               | P06702           | Protein S100-A9 n=5 Tax=Homi | 233.47              | 31.58%          | 2                 | 4             | 114          | 13.2            | 6.13            |

**ZDLCS1\_33 Peptide Summary**

| Sequence              | Protein Descriptions                          | # Proteins | # Protein Groups | Protein Group Accessions | Modifications  | q-Value | PEP     | Charge | m/z [Da]   | MH+ [Da]   | Delta Mass [Da] |
|-----------------------|-----------------------------------------------|------------|------------------|--------------------------|----------------|---------|---------|--------|------------|------------|-----------------|
| RDLGEELEALK           | Myosin-9 n=67 Tax=Tetrapoda ReplD=MYH9        | 1          | 1                | P35579                   |                | 0       | 0.291   | 2      | 637.50842  | 1274.00957 | 0.67            |
| DSTIQVVENGESSQGR      | Uncharacterized protein n=3 Tax=Simiiforme    | 3          | 1                | E9PFJ3                   |                | 0       | 0.257   | 2      | 853.94507  | 1706.88286 | 0.54            |
| sELDQLRQEAELK         | Guanine nucleotide-binding protein G(I)/G(S)  | 1          | 1                | P62873                   | N-Term(Acetyl) | 0       | 0.0768  | 2      | 865.35803  | 1729.70879 | 0.42            |
| VIEHIMEDLDTNADK       | Protein S100-A9 n=5 Tax=Hominoidea ReplD      | 1          | 1                | P06702                   |                | 0       | 0.058   | 2      | 872.52966  | 1744.05205 | 0.61            |
| TELEDTLDTAAQQLR       | Myosin-9 n=67 Tax=Tetrapoda ReplD=MYH9        | 1          | 1                | P35579                   |                | 0       | 0.0111  | 2      | 960.93542  | 1920.86357 | 0.47            |
| ELESQISELQEDLESER     | Myosin-9 n=67 Tax=Tetrapoda ReplD=MYH9        | 1          | 1                | P35579                   |                | 0       | 0.00751 | 2      | 1017.77063 | 2034.53398 | 0.29            |
| TLEEEAKTHEAQIQEMR     | Myosin-9 n=67 Tax=Tetrapoda ReplD=MYH9        | 1          | 1                | P35579                   |                | 0       | 0.0186  | 2      | 1022.62573 | 2044.24419 | 0.63            |
| GDRSEDFGVNEDLADSDAR   | cDNA FLJ51887, highly similar to Annexin A1   | 2          | 1                | B4DL19                   |                | 0       | 0.00602 | 2      | 1035.06653 | 2069.12578 | 0.62            |
| MHEGDEGPGHHHKPGLGEGTP | Protein S100-A9 n=5 Tax=Hominoidea ReplD      | 1          | 1                | P06702                   |                | 0       | 0.0351  | 2      | 1088.93066 | 2176.85405 | 0.45            |
| NKLNLEDALQQAKEDLAR    | Keratin, type II cytoskeletal 1 n=7 Tax=Euthe | 1          | 1                | P04264                   |                | 0       | 0.0397  | 3      | 728.8902   | 2184.65604 | 0.18            |
| MQQNIQELEELEEEESAR    | Myosin-9 n=67 Tax=Tetrapoda ReplD=MYH9        | 1          | 1                | P35579                   |                | 0       | 0.0201  | 2      | 1167.60022 | 2334.19316 | 0.57            |
| KMQQNIQELEELEEEESARQK | Myosin-9 n=67 Tax=Tetrapoda ReplD=MYH9        | 1          | 1                | P35579                   |                | 0       | 0.0304  | 3      | 906.82544  | 2718.46177 | 0.39            |

## 2DLCSCI 51 Protein Summary

| index | Prot_hit | Accession | Description                                                                                        | Mascot Score | Coverage | # Peptides | # PSMs | # AAs | MW [kDa] | calc. pI |
|-------|----------|-----------|----------------------------------------------------------------------------------------------------|--------------|----------|------------|--------|-------|----------|----------|
| 1     | 1.1      | 334126439 | translation elongation factor Tu [Enterobacter hormaechei ATCC 49619]                              | 423.76       | 17.55%   | 4          | 10     | 376   | 41.1     | 5.24     |
| 2     | 1.2      | 161486096 | elongation factor Tu [Escherichia coli CFT073]                                                     | 423.76       | 16.75%   | 4          | 10     | 394   | 43.3     | 5.45     |
| 3     | 1.3      | 26250749  | elongation factor Tu [Escherichia coli CFT073]                                                     | 423.76       | 16.75%   | 4          | 10     | 394   | 43.3     | 5.45     |
| 4     | 2.1      | 334125906 | 30S ribosomal protein S5 [Enterobacter hormaechei ATCC 4916]                                       | 354.27       | 19.88%   | 2          | 6      | 166   | 17.5     | 10.05    |
| 5     | 2.2      | 206580716 | ribosomal protein S5 [Klebsiella pneumoniae 342]                                                   | 354.27       | 19.76%   | 2          | 6      | 167   | 17.6     | 10.11    |
| 6     | 3.1      | 334124951 | phosphate acetyltransferase [Enterobacter hormaechei ATCC 49619]                                   | 161.45       | 4.49%    | 2          | 3      | 713   | 77       | 5.48     |
| 7     | 3.2      | 206580523 | phosphate acetyltransferase [Klebsiella pneumoniae 342]                                            | 161.45       | 4.48%    | 2          | 3      | 715   | 77.2     | 5.47     |
| 8     | 3.3      | 26248686  | phosphate acetyltransferase [Escherichia coli CFT073]                                              | 161.45       | 4.48%    | 2          | 3      | 714   | 77.2     | 5.41     |
| 9     | 4.1      | 334124672 | flagellin [Enterobacter hormaechei ATCC 49162]                                                     | 561.9        | 8.44%    | 3          | 8      | 569   | 58.3     | 4.92     |
| 10    | 4.2      | 334125162 | bacterial flagellin subfamily protein [Enterobacter hormaechei ATCC 49162]                         | 561.9        | 7.15%    | 3          | 8      | 671   | 68.4     | 4.84     |
| 11    | 5        | 334123809 | chaperone GroEL [Enterobacter hormaechei ATCC 49162]                                               | 1441.12      | 35.95%   | 11         | 28     | 548   | 57.1     | 4.94     |
| 12    | 6.1      | 334123523 | chaperone DnaK [Enterobacter hormaechei ATCC 49162]                                                | 110.62       | 4.40%    | 2          | 2      | 637   | 69.1     | 4.96     |
| 13    | 6.2      | 206580041 | chaperone protein DnaK [Klebsiella pneumoniae 342]                                                 | 110.62       | 4.39%    | 2          | 2      | 638   | 69.1     | 4.97     |
| 14    | 6.3      | 26245936  | molecular chaperone DnaK [Escherichia coli CFT073]                                                 | 110.62       | 4.39%    | 2          | 2      | 638   | 69.1     | 4.97     |
| 15    | 7        | 334123429 | dihydrolypoyl dehydrogenase [Enterobacter hormaechei ATCC 49619]                                   | 273.02       | 13.68%   | 3          | 6      | 475   | 50.7     | 6.16     |
| 16    | 8        | 334122958 | ferrienterobactin receptor [Enterobacter hormaechei ATCC 49162]                                    | 312.97       | 10.46%   | 4          | 9      | 746   | 82.6     | 5.67     |
| 17    | 9        | 334122625 | formate acetyltransferase [Enterobacter hormaechei ATCC 49162]                                     | 194.6        | 8.95%    | 4          | 6      | 760   | 85       | 6.09     |
| 18    | 10.1     | 206580744 | ribosomal protein S3 [Klebsiella pneumoniae 342]                                                   | 201.74       | 5.17%    | 1          | 3      | 232   | 25.8     | 10.3     |
| 19    | 10.2     | 334125917 | 30S ribosomal protein S3 [Enterobacter hormaechei ATCC 49162]                                      | 201.74       | 5.15%    | 1          | 3      | 233   | 26       | 10.27    |
| 20    | 10.3     | 197287074 | 30S ribosomal protein S3 [Proteus mirabilis HI4320]                                                | 201.74       | 5.15%    | 1          | 3      | 233   | 25.9     | 10.21    |
| 21    | 11.1     | 206579163 | ribosomal protein L5 [Klebsiella pneumoniae 342]                                                   | 84.35        | 8.38%    | 1          | 1      | 179   | 20.3     | 9.39     |
| 22    | 11.2     | 334125911 | 50S ribosomal protein L5 [Enterobacter hormaechei ATCC 49162]                                      | 84.35        | 8.38%    | 1          | 1      | 179   | 20.3     | 9.39     |
| 23    | 11.3     | 26249896  | 50S ribosomal protein L5 [Escherichia coli CFT073]                                                 | 84.35        | 8.38%    | 1          | 1      | 179   | 20.3     | 9.48     |
| 24    | 12.1     | 206579040 | polyribonucleotide nucleotidyltransferase [Klebsiella pneumoniae 342]                              | 291.6        | 3.94%    | 2          | 4      | 711   | 76.8     | 5.17     |
| 25    | 12.2     | 334125777 | polyribonucleotide nucleotidyltransferase [Enterobacter hormaechei ATCC 49162]                     | 291.6        | 3.93%    | 2          | 4      | 712   | 77       | 5.19     |
| 26    | 12.3     | 26249747  | polynucleotide phosphorylase/polyadenylase [Escherichia coli CFT073]                               | 291.6        | 3.78%    | 2          | 4      | 740   | 80.5     | 5.54     |
| 27    | 13.1     | 206576322 | colicin I receptor [Klebsiella pneumoniae 342]                                                     | 86           | 3.35%    | 2          | 2      | 657   | 73.1     | 5.41     |
| 28    | 13.2     | 229106376 | colicin I receptor [Escherichia coli CFT073]                                                       | 86           | 3.32%    | 2          | 2      | 663   | 73.8     | 5.29     |
| 29    | 14.1     | 206580341 | threonyl-tRNA synthetase [Klebsiella pneumoniae 342]                                               | 66.54        | 2.02%    | 1          | 1      | 642   | 73.9     | 6.23     |
| 30    | 14.2     | 26247970  | threonyl-tRNA synthetase [Escherichia coli CFT073]                                                 | 66.54        | 2.02%    | 1          | 1      | 642   | 74       | 6.19     |
| 31    | 15       | 206577432 | formate acetyltransferase [Klebsiella pneumoniae 342]                                              | 174.34       | 7.89%    | 4          | 5      | 760   | 85.2     | 5.85     |
| 32    | 16.1     | 206580931 | fimbrillin MatB [Klebsiella pneumoniae 342]                                                        | 146.23       | 9.23%    | 1          | 2      | 195   | 20       | 4.88     |
| 33    | 16.2     | 26246302  | hypothetical protein c0404 [Escherichia coli CFT073]                                               | 146.23       | 9.23%    | 1          | 2      | 195   | 20.1     | 4.88     |
| 34    | 17.1     | 206577768 | dihydrolypoyllysine-residue acetyltransferase [Klebsiella pneumoniae 342]                          | 169.35       | 8.89%    | 3          | 4      | 630   | 65.7     | 5.31     |
| 35    | 17.2     | 334123431 | pyruvate dehydrogenase complex E2, dihydroliipoamide acetyltransferase [Klebsiella pneumoniae 342] | 169.35       | 8.85%    | 3          | 4      | 633   | 65.9     | 5.15     |
| 36    | 18.1     | 206578905 | DNA-directed RNA polymerase, beta' subunit [Klebsiella pneumoniae 342]                             | 219.1        | 4.76%    | 4          | 5      | 1407  | 155.3    | 6.8      |
| 37    | 18.2     | 26250759  | DNA-directed RNA polymerase subunit beta' [Escherichia coli CFT073]                                | 219.1        | 4.76%    | 4          | 5      | 1407  | 155.1    | 7.08     |
| 38    | 19.2     | 206579488 | DNA-directed RNA polymerase, beta subunit [Klebsiella pneumoniae 342]                              | 291.18       | 5.96%    | 4          | 6      | 1342  | 150.4    | 5.29     |
| 39    | 19.2     | 334123945 | DNA-directed RNA polymerase subunit beta [Enterobacter hormaechei ATCC 49162]                      | 291.18       | 5.91%    | 4          | 6      | 1353  | 151.6    | 5.27     |
| 40    | 19.3     | 26250758  | DNA-directed RNA polymerase subunit beta [Escherichia coli CFT073]                                 | 291.18       | 5.91%    | 4          | 6      | 1353  | 151.8    | 5.27     |
| 41    | 20.1     | 206577086 | ribosomal protein L10 [Klebsiella pneumoniae 342]                                                  | 215.36       | 29.09%   | 3          | 5      | 165   | 17.8     | 8.98     |
| 42    | 20.2     | 334123947 | 50S ribosomal protein L10 [Enterobacter hormaechei ATCC 49162]                                     | 215.36       | 29.09%   | 3          | 5      | 165   | 17.8     | 8.98     |
| 43    | 20.3     | 26250755  | 50S ribosomal protein L10 [Escherichia coli CFT073]                                                | 215.36       | 29.09%   | 3          | 5      | 165   | 17.7     | 8.98     |
| 44    | 21.1     | 206577888 | ribosomal protein L11 [Klebsiella pneumoniae 342]                                                  | 138.7        | 9.86%    | 1          | 2      | 142   | 14.9     | 9.63     |
| 45    | 21.2     | 26250753  | 50S ribosomal protein L11 [Escherichia coli CFT073]                                                | 138.7        | 9.86%    | 1          | 2      | 142   | 14.9     | 9.63     |
| 46    | 22.1     | 206580919 | ATP synthase F1, alpha subunit [Klebsiella pneumoniae 342]                                         | 229.87       | 9.16%    | 3          | 6      | 513   | 55.1     | 6        |
| 47    | 22.2     | 26250478  | F0F1 ATP synthase subunit alpha [Escherichia coli CFT073]                                          | 229.87       | 9.16%    | 3          | 6      | 513   | 55.2     | 6.13     |
| 48    | 23       | 197286390 | 60 Kda chaperonin [Proteus mirabilis HI4320]                                                       | 276.5        | 12.59%   | 4          | 7      | 548   | 57.6     | 4.89     |
| 49    | 24.1     | 197286835 | glutamate dehydrogenase [Proteus mirabilis HI4320]                                                 | 114.74       | 4.48%    | 1          | 1      | 446   | 48.4     | 7.03     |
| 50    | 24.2     | 334122327 | glutamate dehydrogenase [Enterobacter hormaechei ATCC 49162]                                       | 114.74       | 4.47%    | 1          | 1      | 447   | 48.3     | 6.62     |
| 51    | 24.3     | 206577927 | NADP-specific glutamate dehydrogenase [Klebsiella pneumoniae 342]                                  | 114.74       | 4.47%    | 1          | 1      | 447   | 48.5     | 7.01     |
| 52    | 24.4     | 26248016  | glutamate dehydrogenase [Escherichia coli CFT073]                                                  | 114.74       | 4.47%    | 1          | 1      | 447   | 48.5     | 6.4      |
| 53    | 25.1     | 197287068 | 50S ribosomal protein L3 [Proteus mirabilis HI4320]                                                | 79.69        | 9.09%    | 1          | 1      | 209   | 22.5     | 9.86     |
| 54    | 25.2     | 334125923 | 50S ribosomal protein L3 [Enterobacter hormaechei ATCC 49162]                                      | 79.69        | 9.09%    | 1          | 1      | 209   | 22.2     | 9.82     |
| 55    | 25.3     | 206576036 | ribosomal protein L3 [Klebsiella pneumoniae 342]                                                   | 79.69        | 9.09%    | 1          | 1      | 209   | 22.2     | 9.91     |
| 56    | 25.4     | 26249915  | 50S ribosomal protein L3 [Escherichia coli CFT073]                                                 | 79.69        | 9.09%    | 1          | 1      | 209   | 22.2     | 9.91     |
| 57    | 26.1     | 197287076 | 50S ribosomal protein L29 [Proteus mirabilis HI4320]                                               | 157.97       | 25.40%   | 1          | 2      | 63    | 7.3      | 10.27    |
| 58    | 26.2     | 26249901  | 50S ribosomal protein L29 [Escherichia coli CFT073]                                                | 157.97       | 25.40%   | 1          | 2      | 63    | 7.3      | 9.99     |
| 59    | 27.1     | 197287093 | DNA-directed RNA polymerase subunit alpha [Proteus mirabilis HI4320]                               | 97           | 8.21%    | 2          | 2      | 329   | 36.5     | 5.11     |
| 60    | 27.2     | 334125900 | DNA-directed RNA polymerase subunit alpha [Enterobacter hormaechei ATCC 49162]                     | 97           | 8.21%    | 2          | 2      | 329   | 36.4     | 5.06     |
| 61    | 27.3     | 26249880  | DNA-directed RNA polymerase subunit alpha [Escherichia coli CFT073]                                | 97           | 8.21%    | 2          | 2      | 329   | 36.5     | 5.06     |
| 62    | 28.1     | 197287189 | 50S ribosomal protein L9 [Proteus mirabilis HI4320]                                                | 106.9        | 9.40%    | 1          | 2      | 149   | 15.8     | 6.32     |
| 63    | 28.2     | 334123750 | 5-methyltetrahydropteroyltryptophan--homocysteine S-methyltransferase [Klebsiella pneumoniae 342]  | 106.9        | 9.40%    | 1          | 2      | 149   | 15.6     | 7.42     |
| 64    | 28.3     | 206577504 | ribosomal protein L9 [Klebsiella pneumoniae 342]                                                   | 106.9        | 9.40%    | 1          | 2      | 149   | 15.7     | 6.58     |
| 65    | 28.4     | 26251101  | 50S ribosomal protein L9 [Escherichia coli CFT073]                                                 | 106.9        | 9.40%    | 1          | 2      | 149   | 15.8     | 6.58     |
| 66    | 29.1     | 197287224 | cell division protein [Proteus mirabilis HI4320]                                                   | 79.43        | 2.17%    | 1          | 1      | 646   | 70.9     | 5.83     |
| 67    | 29.2     | 334125787 | ATP-dependent metalloproteinase HflB [Enterobacter hormaechei ATCC 49162]                          | 79.43        | 2.16%    | 1          | 1      | 647   | 71       | 6.11     |
| 68    | 29.3     | 206578792 | ATP-dependent metalloproteinase HflB [Klebsiella pneumoniae 342]                                   | 79.43        | 2.16%    | 1          | 1      | 647   | 71.1     | 6.11     |
| 69    | 30       | 15596155  | porin [Pseudomonas aeruginosa PAO1]                                                                | 181.37       | 4.06%    | 1          | 4      | 443   | 48.3     | 5.16     |
| 70    | 31       | 15596170  | peptidoglycan associated lipoprotein OprL precursor [Pseudomonas aeruginosa PAO1]                  | 158.98       | 21.43%   | 2          | 2      | 168   | 17.9     | 6.34     |
| 71    | 32       | 15596289  | flagellin type B [Pseudomonas aeruginosa PAO1]                                                     | 842.98       | 21.11%   | 6          | 13     | 488   | 49.2     | 5.62     |
| 72    | 33       | 15596783  | dihydroliipoamide succinyltransferase [Pseudomonas aeruginosa PAO1]                                | 73.53        | 4.65%    | 1          | 1      | 409   | 42.9     | 5.55     |

| index | Prot_hit | Accession | Description                                                                                  | Mascot Score | Coverage | # Peptides | # PSMs | # AAs | MW [kDa] | calc. pI |
|-------|----------|-----------|----------------------------------------------------------------------------------------------|--------------|----------|------------|--------|-------|----------|----------|
| 73    | 34       | 15596974  | porin [Pseudomonas aeruginosa PAO1]                                                          | 621.64       | 21.43%   | 5          | 13     | 350   | 37.6     | 5.14     |
| 74    | 35       | 15597001  | DNA-binding protein HU [Pseudomonas aeruginosa PAO1]                                         | 102.46       | 25.56%   | 2          | 2      | 90    | 9.1      | 9.99     |
| 75    | 36       | 15598162  | acyl carrier protein [Pseudomonas aeruginosa PAO1]                                           | 105.24       | 20.51%   | 1          | 2      | 78    | 8.7      | 4.12     |
| 76    | 37       | 15598965  | inosine 5'-monophosphate dehydrogenase [Pseudomonas aeruginosa PAO1]                         | 201.18       | 4.09%    | 1          | 3      | 489   | 51.7     | 6.68     |
| 77    | 38.1     | 15599445  | 30S ribosomal protein S8 [Pseudomonas aeruginosa PAO1]                                       | 145.76       | 9.23%    | 1          | 4      | 130   | 14.2     | 9.57     |
| 78    | 38.2     | 334125909 | 30S ribosomal protein S8 [Enterobacter hormaechei ATCC 4916]                                 | 145.76       | 9.23%    | 1          | 4      | 130   | 14.1     | 9.39     |
| 79    | 38.3     | 206580677 | ribosomal protein S8 [Klebsiella pneumoniae 342]                                             | 145.76       | 9.23%    | 1          | 4      | 130   | 14.1     | 9.42     |
| 80    | 38.4     | 197287082 | 30S ribosomal protein S8 [Proteus mirabilis HI4320]                                          | 145.76       | 9.23%    | 1          | 4      | 130   | 14.2     | 9.23     |
| 81    | 38.5     | 26249894  | 30S ribosomal protein S8 [Escherichia coli CFT073]                                           | 145.76       | 9.23%    | 1          | 4      | 130   | 14.1     | 9.42     |
| 82    | 39       | 15599581  | chaperonin GroEL [Pseudomonas aeruginosa PAO1]                                               | 972.87       | 35.83%   | 11         | 21     | 547   | 57       | 5.14     |
| 83    | 40       | 15599888  | ketol-acid reductoisomerase [Pseudomonas aeruginosa PAO1]                                    | 239          | 5.62%    | 1          | 4      | 338   | 36.4     | 5.85     |
| 84    | 41       | 15600562  | phosphate ABC transporter periplasmic phosphate-binding prot                                 | 182.81       | 8.98%    | 1          | 3      | 323   | 34.5     | 9.09     |
| 85    | 42       | 15600747  | F0F1 ATP synthase subunit beta [Pseudomonas aeruginosa PAO1]                                 | 501.51       | 17.69%   | 5          | 10     | 458   | 49.5     | 5.11     |
| 86    | 43       | 15600748  | F0F1 ATP synthase subunit gamma [Pseudomonas aeruginosa PAO1]                                | 47.49        | 6.64%    | 1          | 1      | 286   | 31.5     | 7.87     |
| 87    | 44.1     | 116516768 | eno gene product [Streptococcus pneumoniae D39]                                              | 105.34       | 5.76%    | 2          | 3      | 434   | 47.1     | 4.81     |
| 88    | 44.2     | 225858936 | phosphopyruvate hydratase [Streptococcus pneumoniae 70S85]                                   | 105.34       | 5.76%    | 2          | 3      | 434   | 47.1     | 4.81     |
| 89    | 44.3     | 149003747 | phosphopyruvate hydratase [Streptococcus pneumoniae SP14-I]                                  | 105.34       | 5.73%    | 2          | 3      | 436   | 47.3     | 4.83     |
| 90    | 45.1     | 116516621 | rplL gene product [Streptococcus pneumoniae D39]                                             | 182.24       | 19.67%   | 3          | 5      | 122   | 12.4     | 4.49     |
| 91    | 45.2     | 303254509 | 50S ribosomal protein L7/L12 [Streptococcus pneumoniae BS45]                                 | 182.24       | 19.67%   | 3          | 5      | 122   | 12.5     | 4.49     |
| 92    | 46.1     | 116516442 | gap gene product [Streptococcus pneumoniae D39]                                              | 392.14       | 18.21%   | 4          | 9      | 335   | 35.8     | 5.47     |
| 93    | 46.2     | 225859769 | glyceraldehyde-3-phosphate dehydrogenase, type I [Streptococcus pneumoniae D39]              | 392.14       | 18.21%   | 4          | 9      | 335   | 35.8     | 5.59     |
| 94    | 46.3     | 182684949 | glyceraldehyde-3-phosphate dehydrogenase [Streptococcus pneumoniae D39]                      | 392.14       | 16.99%   | 4          | 9      | 359   | 38.7     | 6.34     |
| 95    | 46.4     | 169832817 | glyceraldehyde-3-phosphate dehydrogenase, type I [Streptococcus pneumoniae D39]              | 392.14       | 18.21%   | 4          | 9      | 335   | 35.8     | 5.47     |
| 96    | 46.5     | 298501510 | glyceraldehyde-3-phosphate dehydrogenase [Streptococcus pneumoniae D39]                      | 392.14       | 17.73%   | 4          | 9      | 344   | 37       | 5.96     |
| 97    | 46.6     | 15903867  | glyceraldehyde-3-phosphate dehydrogenase [Streptococcus pneumoniae D39]                      | 392.14       | 16.99%   | 4          | 9      | 359   | 38.7     | 6.13     |
| 98    | 46.7     | 183603733 | glyceraldehyde-3-phosphate dehydrogenase, type I [Streptococcus pneumoniae D39]              | 392.14       | 17.73%   | 4          | 9      | 344   | 37       | 5.96     |
| 99    | 47.1     | 116515886 | unnamed protein product [Streptococcus pneumoniae D39]                                       | 100.04       | 1.47%    | 1          | 2      | 883   | 97.2     | 6.55     |
| 100   | 47.2     | 15903879  | bifunctional acetaldehyde-CoA/alcohol dehydrogenase [Streptococcus pneumoniae D39]           | 100.04       | 1.46%    | 1          | 2      | 890   | 98.1     | 6.48     |
| 101   | 48.1     | 116515871 | rplR gene product [Streptococcus pneumoniae D39]                                             | 77.98        | 25.42%   | 1          | 1      | 118   | 12.9     | 10.4     |
| 102   | 48.2     | 182683204 | 50S ribosomal protein L18 [Streptococcus pneumoniae CGSP14]                                  | 77.98        | 22.90%   | 1          | 1      | 131   | 14.4     | 10.49    |
| 103   | 48.3     | 111658785 | hypothetical protein SpneT_02000082 [Streptococcus pneumoniae D39]                           | 77.98        | 24.79%   | 1          | 1      | 121   | 13.2     | 10.43    |
| 104   | 49.1     | 116515356 | tuf gene product [Streptococcus pneumoniae D39]                                              | 336          | 4.27%    | 2          | 5      | 398   | 43.9     | 4.97     |
| 105   | 49.2     | 182684444 | elongation factor Tu [Streptococcus pneumoniae CGSP14]                                       | 336          | 4.21%    | 2          | 5      | 404   | 44.7     | 4.94     |
| 106   | 50       | 169834089 | 50S ribosomal protein L11 [Streptococcus pneumoniae Hungary]                                 | 79.78        | 17.02%   | 1          | 1      | 141   | 14.8     | 9.7      |
| 107   | 51.1     | 26246055  | pyruvate dehydrogenase subunit E1 [Escherichia coli CFT073]                                  | 942.61       | 21.20%   | 13         | 27     | 887   | 99.6     | 5.68     |
| 108   | 51.2     | 206576843 | pyruvate dehydrogenase (acetyl-transferring), homodimeric type I [Escherichia coli CFT073]   | 564.21       | 14.43%   | 8          | 16     | 887   | 99.5     | 5.64     |
| 109   | 52       | 161486328 | dihydroliipoamide dehydrogenase [Escherichia coli CFT073]                                    | 426.07       | 14.14%   | 4          | 9      | 474   | 50.7     | 6.15     |
| 110   | 53.1     | 26246108  | serine endoprotease [Escherichia coli CFT073]                                                | 122.8        | 4.22%    | 1          | 2      | 474   | 49.3     | 8.56     |
| 111   | 53.1     | 334123382 | protease do [Enterobacter hormaechei ATCC 49162]                                             | 122.8        | 4.19%    | 1          | 2      | 477   | 49.4     | 8.56     |
| 112   | 54       | 26246124  | periplasmic chaperone [Escherichia coli CFT073]                                              | 83.19        | 9.94%    | 1          | 1      | 161   | 17.7     | 9.7      |
| 113   | 55       | 26246476  | acriflavin resistance protein A [Escherichia coli CFT073]                                    | 98.08        | 5.13%    | 1          | 2      | 409   | 43.5     | 8.43     |
| 114   | 56       | 26246561  | outer membrane receptor FepA [Escherichia coli CFT073]                                       | 989.75       | 23.32%   | 10         | 22     | 746   | 82       | 5.45     |
| 115   | 57.1     | 161486279 | succinate dehydrogenase flavoprotein subunit [Escherichia coli CFT073]                       | 149.4        | 2.38%    | 1          | 2      | 588   | 64.4     | 6.27     |
| 116   | 57.2     | 334122842 | succinate dehydrogenase [Enterobacter hormaechei ATCC 49162]                                 | 149.4        | 2.38%    | 1          | 2      | 588   | 64.4     | 6.02     |
| 117   | 57.3     | 206580158 | succinate dehydrogenase, flavoprotein subunit [Klebsiella pneumoniae 342]                    | 149.4        | 2.38%    | 1          | 2      | 588   | 64.5     | 6.23     |
| 118   | 57.4     | 197284464 | succinate dehydrogenase flavoprotein subunit [Proteus mirabilis HI4320]                      | 149.4        | 2.38%    | 1          | 2      | 588   | 64.7     | 6.02     |
| 119   | 57.5     | 15596780  | succinate dehydrogenase flavoprotein subunit [Pseudomonas aeruginosa PAO1]                   | 149.4        | 2.37%    | 1          | 2      | 590   | 63.5     | 6.49     |
| 120   | 58       | 26246711  | peptidoglycan-associated outer membrane lipoprotein [Escherichia coli CFT073]                | 197.32       | 8.29%    | 1          | 4      | 181   | 19.7     | 6.8      |
| 121   | 59       | 26246790  | outer membrane protein X [Escherichia coli CFT073]                                           | 118.93       | 8.67%    | 1          | 2      | 173   | 18.8     | 7.17     |
| 122   | 60.1     | 26246936  | 30S ribosomal protein S1 [Escherichia coli CFT073]                                           | 323.59       | 16.88%   | 5          | 7      | 557   | 61.1     | 4.98     |
| 123   | 60.2     | 334122618 | 30S ribosomal protein S1 [Enterobacter hormaechei ATCC 49162]                                | 323.59       | 16.88%   | 5          | 7      | 557   | 61.2     | 4.98     |
| 124   | 61       | 26246978  | outer membrane protein A [Escherichia coli CFT073]                                           | 234.25       | 15.83%   | 5          | 10     | 379   | 41       | 6.71     |
| 125   | 62       | 26247566  | global DNA-binding transcriptional dual regulator H-NS [Escherichia coli CFT073]             | 85.19        | 10.22%   | 1          | 1      | 137   | 15.5     | 5.47     |
| 126   | 63       | 26247570  | bifunctional acetaldehyde-CoA/alcohol dehydrogenase [Escherichia coli CFT073]                | 1498.61      | 25.25%   | 17         | 36     | 891   | 96.1     | 6.79     |
| 127   | 64       | 26247735  | hypothetical protein c1877 [Escherichia coli CFT073]                                         | 62.51        | 5.10%    | 1          | 1      | 353   | 38.7     | 9.31     |
| 128   | 65.1     | 26247927  | major outer membrane lipoprotein [Escherichia coli CFT073]                                   | 197.29       | 15.38%   | 1          | 4      | 78    | 8.3      | 9.25     |
| 129   | 65.2     | 334122238 | major outer membrane lipoprotein [Enterobacter hormaechei ATCC 49162]                        | 197.29       | 15.38%   | 1          | 4      | 78    | 8.4      | 9.31     |
| 130   | 66       | 26248038  | glyceraldehyde-3-phosphate dehydrogenase [Escherichia coli CFT073]                           | 488.47       | 19.76%   | 5          | 13     | 334   | 35.9     | 6.8      |
| 131   | 67       | 26248190  | flagellin [Escherichia coli CFT073]                                                          | 577.89       | 9.24%    | 3          | 7      | 595   | 60.9     | 4.91     |
| 132   | 68       | 26248274  | putative inner membrane ABC-transporter [Escherichia coli CFT073]                            | 64.1         | 2.67%    | 1          | 1      | 600   | 66.2     | 9.03     |
| 133   | 69       | 26248288  | putative pesticin receptor [Escherichia coli CFT073]                                         | 991.03       | 32.10%   | 11         | 23     | 673   | 73.6     | 5.73     |
| 134   | 70       | 26248619  | DNA gyrase subunit A [Escherichia coli CFT073]                                               | 180.81       | 2.17%    | 1          | 2      | 875   | 96.9     | 5.2      |
| 135   | 71.1     | 26248830  | malic enzyme [Escherichia coli CFT073]                                                       | 98.86        | 2.64%    | 1          | 2      | 759   | 82.4     | 5.5      |
| 136   | 71.2     | 334125040 | NADP-dependent malate dehydrogenase (oxaloacetate-decarboxylating) [Escherichia coli CFT073] | 98.86        | 2.64%    | 1          | 2      | 759   | 82.3     | 5.35     |
| 137   | 73       | 26248869  | inosine 5'-monophosphate dehydrogenase [Escherichia coli CFT073]                             | 315.86       | 7.24%    | 2          | 5      | 511   | 54.6     | 6.42     |
| 138   | 74.1     | 161486147 | autonomous glycol radical cofactor GrcA [Escherichia coli CFT073]                            | 91.92        | 26.77%   | 2          | 2      | 127   | 14.3     | 5.17     |
| 139   | 74.2     | 206580560 | autonomous glycol radical cofactor [Klebsiella pneumoniae 342]                               | 91.92        | 26.77%   | 2          | 2      | 127   | 14.2     | 5.02     |
| 140   | 75       | 26249182  | phosphopyruvate hydratase [Escherichia coli CFT073]                                          | 550.99       | 23.84%   | 5          | 10     | 432   | 45.6     | 5.48     |
| 141   | 76       | 26249208  | L-fucose isomerase [Escherichia coli CFT073]                                                 | 122.44       | 6.26%    | 2          | 3      | 591   | 65       | 6.07     |
| 142   | 77       | 161486121 | outer membrane channel protein [Escherichia coli CFT073]                                     | 102.75       | 5.48%    | 2          | 3      | 493   | 53.7     | 6.09     |
| 143   | 78       | 161486111 | ATP-dependent RNA helicase DeaD [Escherichia coli CFT073]                                    | 162.95       | 6.84%    | 2          | 2      | 629   | 70.5     | 8.72     |
| 144   | 79       | 26249906  | 50S ribosomal protein L22 [Escherichia coli CFT073]                                          | 80.73        | 21.82%   | 1          | 1      | 110   | 12.2     | 10.23    |
| 145   | 80       | 26249916  | 30S ribosomal protein S10 [Escherichia coli CFT073]                                          | 92.47        | 14.56%   | 1          | 2      | 103   | 11.7     | 9.69     |

| index | Prot_hit | Accession     | Description                                                     | Mascot Score | Coverage | # Peptides | # PSMs | # AAs | MW [kDa] | calc. pl |
|-------|----------|---------------|-----------------------------------------------------------------|--------------|----------|------------|--------|-------|----------|----------|
| 146   | 81       | 26249938      | 30S ribosomal protein S7 [Escherichia coli CFT073]              | 283.4        | 11.54%   | 2          | 5      | 156   | 17.6     | 10.3     |
| 147   | 82       | 26250130      | outer membrane heme/hemoglobin receptor [Escherichia coli C     | 559.72       | 17.28%   | 6          | 12     | 648   | 71.1     | 5.22     |
| 148   | 83.1     | 26250476      | F0F1 ATP synthase subunit beta [Escherichia coli CFT073]        | 580.81       | 25.43%   | 6          | 11     | 460   | 50.3     | 5.01     |
| 149   | 83.2     | 334121923     | ATP synthase F1 sector beta subunit [Enterobacter hormaechei    | 580.81       | 25.43%   | 6          | 11     | 460   | 50.2     | 5        |
| 150   | 84       | 26250714      | peroxidase/catalase HPI [Escherichia coli CFT073]               | 118.35       | 2.17%    | 1          | 1      | 739   | 81.4     | 5.31     |
| 151   | 85.1     | 161486036     | glycerol dehydrogenase [Escherichia coli CFT073]                | 210.67       | 4.63%    | 1          | 3      | 367   | 38.7     | 4.88     |
| 152   | 85.2     | 334121800     | glycerol dehydrogenase [Enterobacter hormaechei ATCC 49162      | 210.67       | 4.63%    | 1          | 3      | 367   | 38.9     | 5.1      |
| 153   | 85.3     | 206579133     | glycerol dehydrogenase [Klebsiella pneumoniae 342]              | 210.67       | 4.63%    | 1          | 3      | 367   | 38.6     | 5.1      |
| 154   | 84       | 26251030      | aspartate ammonia-lyase [Escherichia coli CFT073]               | 58.34        | 4.67%    | 1          | 1      | 493   | 54       | 5.76     |
| 155   | 85       | 26251035      | chaperonin GroEL [Escherichia coli CFT073]                      | 1528.99      | 36.13%   | 12         | 31     | 548   | 57.3     | 4.94     |
| 156   | 86       | P62805        | Histone H4 n=219 Tax=Eukaryota RepID=H4_HUMAN                   | 111.98       | 30.10%   | 2          | 3      | 103   | 11.4     | 11.36    |
| 157   | 87       | P04264        | Keratin, type II cytoskeletal 1 n=7 Tax=Eutheria RepID=K2C1_HL  | 428.67       | 9.94%    | 3          | 5      | 644   | 66       | 8.12     |
| 158   | 88       | P13645        | Keratin, type I cytoskeletal 10 n=12 Tax=Eutheria RepID=K1C10_  | 98.17        | 4.62%    | 1          | 2      | 584   | 58.8     | 5.21     |
| 159   | 89       | P05109        | Protein S100-A8 n=5 Tax=Hominoidea RepID=S10A8_HUMAN            | 134.52       | 24.73%   | 3          | 5      | 93    | 10.8     | 7.03     |
| 160   | 90       | P06702        | Protein S100-A9 n=5 Tax=Hominoidea RepID=S10A9_HUMAN            | 1398.2       | 78.07%   | 7          | 37     | 114   | 13.2     | 6.13     |
| 161   | 91.1     | E9PFJ3        | Uncharacterized protein n=3 Tax=Simiiformes RepID=E9PFJ3_H      | 3325.36      | 14.88%   | 10         | 78     | 578   | 63.3     | 5.31     |
| 162   | 91.2     | P07911        | Uromodulin n=2 Tax=Catarrhini RepID=UROM_HUMAN                  | 3325.36      | 13.44%   | 10         | 78     | 640   | 69.7     | 5.24     |
| 163   | 92.1     | Q9UP81        | Mutant beta-globin n=1 Tax=Homo sapiens RepID=Q9UP81_HU         | 181.63       | 35.96%   | 2          | 3      | 89    | 9.7      | 8.19     |
| 164   | 92.2     | B3VL86        | Mutant beta-globin n=4 Tax=Homo sapiens RepID=B3VL86_HUI        | 181.63       | 23.02%   | 2          | 3      | 139   | 14.9     | 6.77     |
| 165   | 92.3     | P68871        | Hemoglobin subunit beta n=102 Tax=Primates RepID=HBB_HUM        | 181.63       | 21.77%   | 2          | 3      | 147   | 16       | 7.28     |
| 166   | 92.4     | Q14473        | Beta-globin gene from a thalassemia patient, n=1 Tax=Homo sa    | 181.63       | 18.29%   | 2          | 3      | 175   | 18.9     | 6.79     |
| 167   | 93.1     | B4DW52        | Uncharacterized protein n=12 Tax=Coelomata RepID=B4DW52_        | 257.3        | 25.65%   | 5          | 8      | 347   | 38.6     | 5.35     |
| 168   | 93.2     | P63261        | Actin, cytoplasmic 2 n=1334 RepID=ACTG_HUMAN                    | 257.3        | 23.73%   | 5          | 8      | 375   | 41.8     | 5.48     |
| 169   | 94.1     | P06899        | Histone H2B type 1-J n=102 Tax=Euteleostomi RepID=H2B1J_HL      | 179.87       | 11.90%   | 1          | 2      | 126   | 13.9     | 10.32    |
| 170   | 94.2     | P62807        | Histone H2B type 1-C/E/F/G/I n=44 Tax=Euteleostomi RepID=H:     | 179.87       | 11.90%   | 1          | 2      | 126   | 13.9     | 10.32    |
| 171   | 94.3     | B4DR52        | Histone H2B n=5 Tax=Euarchopterygii RepID=B4DR52_HUMAN          | 179.87       | 9.04%    | 1          | 2      | 166   | 18       | 10.32    |
| 172   | 94.4     | P58876        | Histone H2B type 1-D n=136 Tax=Coelomata RepID=H2B1D_HU         | 179.87       | 11.90%   | 1          | 2      | 126   | 13.9     | 10.32    |
| 173   | 95.1     | P01834        | Ig kappa chain C region n=2 Tax=Homo sapiens RepID=IGKC_HL      | 121.21       | 35.85%   | 2          | 2      | 106   | 11.6     | 5.87     |
| 174   | 95.2     | UPI000011049E | IGG CTM01 FAB (LIGHT CHAIN) n=2 Tax=Homo sapiens RepID=l        | 121.21       | 17.35%   | 2          | 2      | 219   | 24.1     | 7.74     |
| 175   | 95.3     | Q0KKI6        | Immunoglobulin light chain (Fragment) n=3 Tax=Homo sapiens      | 121.21       | 17.35%   | 2          | 2      | 219   | 24       | 8.06     |
| 176   | 95.4     | Q5EFE6        | Anti-RhD monoclonal T125 kappa light chain n=1 Tax=Homo sa      | 121.21       | 16.24%   | 2          | 2      | 234   | 25.7     | 8.43     |
| 177   | 95.5     | Q6GMX0        | Putative uncharacterized protein n=14 Tax=Euarchopterygii Re    | 121.21       | 16.10%   | 2          | 2      | 236   | 25.8     | 7.97     |
| 178   | 95.6     | Q6P5S8        | IGK@ protein n=6 Tax=Homo sapiens RepID=Q6P5S8_HUMAN            | 121.21       | 16.10%   | 2          | 2      | 236   | 25.8     | 6.33     |
| 179   | 95.7     | Q723Y4        | Putative uncharacterized protein n=3 Tax=Hominoidea RepID=Q:    | 121.21       | 16.10%   | 2          | 2      | 236   | 25.7     | 7.59     |
| 180   | 95.8     | UPI000011049S | ANTIBODY A5B7 (LIGHT CHAIN) n=1 Tax=Homo sapiens RepID=l        | 121.21       | 17.84%   | 2          | 2      | 213   | 23.1     | 8.06     |
| 181   | 95.9     | UPI0000110769 | ANTIBODY n=1 Tax=Homo sapiens RepID=UPI0000110769               | 121.21       | 17.76%   | 2          | 2      | 214   | 23.6     | 6.33     |
| 182   | 95.10    | UPI000014CDC4 | OMALIZUMAB LIGHT CHAIN n=2 Tax=Homo sapiens RepID=UPI           | 121.21       | 17.43%   | 2          | 2      | 218   | 23.9     | 5.39     |
| 183   | 95.11    | UPI00003CEBF2 | HU35193 Fab fragment, light chain n=3 Tax=Euarchopterygii Re    | 121.21       | 17.35%   | 2          | 2      | 219   | 24       | 8.06     |
| 184   | 95.12    | UPI0001A7C522 | HUMAN IGG ABT-325 n=1 Tax=Homo sapiens RepID=UPI0001A           | 121.21       | 17.76%   | 2          | 2      | 214   | 23.5     | 6.55     |
| 185   | 95.13    | UPI0001A7C54C | Fab 213e1 n=3 Tax=Euarchopterygii RepID=UPI0001A7C54C           | 121.21       | 17.92%   | 2          | 2      | 212   | 23.1     | 7.71     |
| 186   | 95.14    | UPI0001C591D8 | Humanized recombinant Fab fragment of a murin n=5 Tax=Eu        | 121.21       | 16.59%   | 2          | 2      | 229   | 25.1     | 5.62     |
| 187   | 95.15    | UPI0001D3410B | Immunoglobulin light chain n=1 Tax=Homo sapiens RepID=UPI0      | 121.21       | 17.43%   | 2          | 2      | 218   | 23.3     | 8.05     |
| 188   | 95.16    | UPI0001F2FE82 | Fab 2G12, light chain n=2 Tax=Homo sapiens RepID=UPI0001F2      | 121.21       | 17.84%   | 2          | 2      | 213   | 23.2     | 8.13     |
| 189   | 95.17    | UPI0002003CF0 | IMMUNOGLOBULIN A1 LIGHT CHAIN n=1 Tax=Homo sapiens Re           | 121.21       | 17.35%   | 2          | 2      | 219   | 24       | 6.77     |
| 190   | 95.18    | UPI000211B3C2 | B3 (IGKV4-1) light chain n=1 Tax=Homo sapiens RepID=UPI0002     | 121.21       | 17.27%   | 2          | 2      | 220   | 24.2     | 6.55     |
| 191   | 95.19    | UPI0002177BCC | S4 FAB LIGHT CHAIN n=1 Tax=Homo sapiens RepID=UPI000217:        | 121.21       | 18.01%   | 2          | 2      | 211   | 22.7     | 7.77     |
| 192   | 96       | P01833        | Polymeric immunoglobulin receptor n=5 Tax=Hominoidea Repl       | 91.81        | 2.62%    | 1          | 1      | 764   | 83.2     | 5.74     |
| 193   | 97       | Q6MZU6        | Putative uncharacterized protein DKFZp686C15213 n=1 Tax=Ho      | 147.18       | 8.41%    | 2          | 3      | 464   | 51.1     | 7.71     |
| 194   | 98.1     | P01876        | Ig alpha-1 chain C region n=2 Tax=Homo sapiens RepID=IGHA1_     | 556.05       | 14.73%   | 4          | 12     | 353   | 37.6     | 6.51     |
| 195   | 98.2     | Q96DK0        | cDNA FLJ25298 fis, clone STM07683, highly similar to Protein Tr | 556.05       | 10.48%   | 4          | 12     | 496   | 53.5     | 6.65     |
| 196   | 98.3     | Q6N090        | Putative uncharacterized protein DKFZp686G21220 (Fragment)      | 556.05       | 10.28%   | 4          | 12     | 506   | 54.4     | 6.6      |
| 197   | 98.4     | Q6ZW64        | cDNA FLJ41552 fis, clone COLON2004478, highly similar to Prot   | 556.05       | 10.53%   | 4          | 12     | 494   | 53.3     | 6.52     |
| 198   | 98.5     | Q8WY24        | SNC66 protein n=1 Tax=Homo sapiens RepID=Q8WY24_HUMAN           | 556.05       | 10.46%   | 4          | 12     | 497   | 53.6     | 6.67     |
| 199   | 99.1     | A11195        | TUBB2B protein (Fragment) n=16 Tax=Fungi/Metazoa group Re       | 109.49       | 23.94%   | 2          | 2      | 188   | 20.6     | 5.05     |
| 200   | 99.2     | Q13885        | Tubulin beta-2A chain n=339 RepID=TBB2A_HUMAN                   | 109.49       | 10.11%   | 2          | 2      | 445   | 49.9     | 4.89     |
| 201   | 99.3     | Q5ST81        | Tubulin beta polypeptide n=8 Tax=Eukaryota RepID=Q5ST81_HL      | 109.49       | 12.10%   | 2          | 2      | 372   | 41.7     | 4.91     |
| 202   | 99.4     | E9PBJ4        | Uncharacterized protein n=2 Tax=Homo sapiens RepID=E9PBJ4_      | 109.49       | 18.52%   | 2          | 2      | 243   | 27.4     | 4.49     |
| 203   | 100.1    | P01857        | Ig gamma-1 chain C region n=3 Tax=Homo sapiens RepID=IGHG       | 372.33       | 19.70%   | 4          | 14     | 330   | 36.1     | 8.19     |
| 204   | 100.2    | A8K008        | cDNA FLJ78387 n=2 Tax=Homo sapiens RepID=A8K008_HUMAN           | 372.33       | 13.77%   | 4          | 14     | 472   | 51.6     | 8.16     |
| 205   | 100.3    | Q6GMX6        | IGH@ protein n=2 Tax=Homo sapiens RepID=Q6GMX6_HUMAN            | 372.33       | 13.98%   | 4          | 14     | 465   | 51.1     | 8.69     |
| 206   | 100.4    | Q6N094        | Putative uncharacterized protein DKFZp686O01196 n=3 Tax=Hc      | 372.33       | 13.54%   | 4          | 14     | 480   | 52.6     | 8.18     |
| 207   | 100.5    | Q6N097        | Putative uncharacterized protein DKFZp686H20196 n=1 Tax=Ho      | 372.33       | 13.51%   | 4          | 14     | 481   | 52.7     | 8.48     |
| 208   | 101      | P11678        | Eosinophil peroxidase n=6 Tax=Simiiformes RepID=PERE_HUM/       | 104.06       | 3.50%    | 3          | 4      | 715   | 81       | 10.29    |
| 209   | 102      | P05164        | Myeloperoxidase n=6 Tax=Catarrhini RepID=PERM_HUMAN             | 190.57       | 12.35%   | 6          | 6      | 745   | 83.8     | 8.97     |
| 210   | 103.1    | D6RHJ6        | Uncharacterized protein n=1 Tax=Homo sapiens RepID=D6RHJ6       | 85.85        | 7.64%    | 1          | 1      | 157   | 17.7     | 6.32     |
| 211   | 103.2    | P01591        | Immunoglobulin J chain n=12 Tax=Simiiformes RepID=IGJ_HUM       | 85.85        | 7.55%    | 1          | 1      | 159   | 18.1     | 5.24     |
| 212   | 104      | P01871        | Ig mu chain C region n=4 Tax=Homo sapiens RepID=IGHM_HUM        | 80.73        | 3.54%    | 1          | 1      | 452   | 49.3     | 6.77     |
| 213   | 105.1    | P0CG05        | Ig lambda-2 chain C regions n=4 Tax=Homo sapiens RepID=LAC:     | 474.26       | 34.91%   | 3          | 11     | 106   | 11.3     | 7.24     |
| 214   | 105.2    | A0ASE4        | Putative uncharacterized protein n=1 Tax=Homo sapiens RepID     | 474.26       | 15.74%   | 3          | 11     | 235   | 24.7     | 5.94     |
| 215   | 105.3    | A2NUT2        | Lambda-chain (AA -20 to 215) n=5 Tax=Euarchopterygii RepID      | 474.26       | 15.74%   | 3          | 11     | 235   | 24.6     | 7.62     |
| 216   | 105.4    | C6KXN3        | Lambda light chain of human immunoglobulin surface antigen-r    | 474.26       | 15.95%   | 3          | 11     | 232   | 24.7     | 5.54     |
| 217   | 105.5    | Q567P1        | IGL@ protein n=3 Tax=Homo sapiens RepID=Q567P1_HUMAN            | 474.26       | 15.74%   | 3          | 11     | 235   | 24.8     | 7.3      |
| 218   | 105.6    | Q6GMW3        | IGL@ protein n=7 Tax=Hominoidea RepID=Q6GMW3_HUMAN              | 474.26       | 15.81%   | 3          | 11     | 234   | 24.6     | 6.37     |

| index | Prot_hit | Accession     | Description                                                     | Mascot Score | Coverage | # Peptides | # PSMs | # AAs | MW [kDa] | calc. pI |
|-------|----------|---------------|-----------------------------------------------------------------|--------------|----------|------------|--------|-------|----------|----------|
| 219   | 105.7    | Q6GMX3        | IGL@ protein n=3 Tax=Homo sapiens RepID=Q6GMX3_HUMAN            | 474.26       | 15.68%   | 3          | 11     | 236   | 24.7     | 6.89     |
| 220   | 105.8    | Q6IPQ0        | IGL@ protein n=6 Tax=Homo sapiens RepID=Q6IPQ0_HUMAN            | 474.26       | 15.68%   | 3          | 11     | 236   | 24.8     | 6.76     |
| 221   | 105.9    | Q7Z2U7        | Putative uncharacterized protein n=1 Tax=Homo sapiens RepID=    | 474.26       | 15.81%   | 3          | 11     | 234   | 25       | 6.38     |
| 222   | 105.10   | Q8N5F4        | IGL@ protein n=4 Tax=Hominoidea RepID=Q8N5F4_HUMAN              | 474.26       | 15.88%   | 3          | 11     | 233   | 24.9     | 5.34     |
| 223   | 105.11   | UPI000158A17D | Bence Jones KWR Protein - Immunoglobulin Ligh n=1 Tax=Homc      | 474.26       | 17.05%   | 3          | 11     | 217   | 22.7     | 6.16     |
| 224   | 105.12   | UPI0001BEF2DB | Fab 537-10D, light chain n=1 Tax=Homo sapiens RepID=UPI000:     | 474.26       | 17.05%   | 3          | 11     | 217   | 22.9     | 7.25     |
| 225   | 105.13   | UPI0001D63C09 | Antibody PG16 Light Chain n=3 Tax=Homo sapiens RepID=UPI00      | 474.26       | 17.13%   | 3          | 11     | 216   | 22.7     | 6.99     |
| 226   | 105.14   | UPI0001D63C0B | Antibody PG9 light chain n=1 Tax=Homo sapiens RepID=UPI000      | 474.26       | 17.13%   | 3          | 11     | 216   | 22.8     | 8.5      |
| 227   | 106.1    | Q9UL88        | Myosin-reactive immunoglobulin heavy chain variable region (F   | 154.17       | 14.50%   | 1          | 2      | 131   | 14.1     | 9.63     |
| 228   | 106.2    | UPI0001BEF2D9 | Fab 447-52D, heavy chain n=1 Tax=Homo sapiens RepID=UPI00       | 154.17       | 8.09%    | 1          | 2      | 235   | 25.2     | 8.5      |
| 229   | 107      | P01619        | Ig kappa chain V-III region B6 n=1 Tax=Homo sapiens RepID=KV    | 72.47        | 16.67%   | 1          | 1      | 108   | 11.6     | 9.25     |
| 230   | 108.1    | B1N7B8        | Cryocrystalglobulin CC1 kappa light chain variable region (Frag | 88.02        | 16.82%   | 1          | 1      | 107   | 11.8     | 7.99     |
| 231   | 108.2    | A0N5G5        | Rheumatoid factor D5 light chain (Fragment) n=1 Tax=Homo saj    | 88.02        | 15.25%   | 1          | 1      | 118   | 12.8     | 8.97     |
| 232   | 109      | P02788        | Lactotransferrin n=24 Tax=Hominoidea RepID=TRFL_HUMAN           | 190.97       | 6.06%    | 2          | 3      | 710   | 78.1     | 8.12     |
| 233   | 110.1    | B1AM77        | Stomatin n=5 Tax=Mammalia RepID=B1AM77_HUMAN                    | 68.29        | 16.26%   | 1          | 1      | 123   | 13.5     | 8.02     |
| 234   | 110.2    | E7EQ93        | Uncharacterized protein n=3 Tax=Simiiformes RepID=E7EQ93_t      | 68.29        | 10.70%   | 1          | 1      | 187   | 20.8     | 8.87     |
| 235   | 110.3    | P27105        | Erythrocyte band 7 integral membrane protein n=13 Tax=Euthe     | 68.29        | 6.94%    | 1          | 1      | 288   | 31.7     | 7.88     |









**2DLCSCI\_36 Protein Summary**

| index | Prot_hit | Accession | Description                                                      | Mascot Score | Coverage | # Peptides | # PSMs | # AAs | MW [kDa] | calc. pI |
|-------|----------|-----------|------------------------------------------------------------------|--------------|----------|------------|--------|-------|----------|----------|
| 1     | 1        | 334124896 | outer membrane protein N [Enterobacter hormaechei ATCC 49        | 165.28       | 11.02%   | 2          | 3      | 363   | 40       | 4.61     |
| 2     | 2        | 26246561  | outer membrane receptor FepA [Escherichia coli CFT073]           | 172.29       | 2.28%    | 1          | 2      | 746   | 82       | 5.45     |
| 3     | 3        | 26248604  | outer membrane porin protein C [Escherichia coli CFT073]         | 266.82       | 10.67%   | 2          | 5      | 375   | 41.2     | 4.83     |
| 4     | 4        | 26249182  | phosphopyruvate hydratase [Escherichia coli CFT073]              | 166.14       | 3.70%    | 1          | 3      | 432   | 45.6     | 5.48     |
| 5     | 5        | P05109    | Protein S100-A8 n=5 Tax=Hominoidea RepID=S10A8_HUMAN             | 326.4        | 37.63%   | 5          | 10     | 93    | 10.8     | 7.03     |
| 6     | 6.1      | P06702    | Protein S100-A9 n=5 Tax=Hominoidea RepID=S10A9_HUMAN             | 2872.03      | 84.21%   | 10         | 60     | 114   | 13.2     | 6.13     |
| 7     | 6.2      | 116517025 | unnamed protein product [Streptococcus pneumoniae D39]           | 48.18        | 3.13%    | 1          | 1      | 192   | 22       | 8.94     |
| 8     | 6.3      | 225858457 | uracil DNA glycosylase family protein [Streptococcus pneumon     | 48.18        | 3.13%    | 1          | 1      | 192   | 22.1     | 8.69     |
| 9     | 6.4      | 15900532  | hypothetical protein SP_0624 [Streptococcus pneumoniae TIGI      | 48.18        | 3.13%    | 1          | 1      | 192   | 22.1     | 8.69     |
| 10    | 6.5      | 182683555 | hypothetical protein SPCG_0585 [Streptococcus pneumoniae C       | 48.18        | 3.13%    | 1          | 1      | 192   | 22.1     | 8.69     |
| 11    | 6.6      | 307067239 | hypothetical protein SPAP_0610 [Streptococcus pneumoniae A       | 48.18        | 3.13%    | 1          | 1      | 192   | 22.1     | 8.69     |
| 12    | 6.7      | 168485735 | uracil DNA glycosylase family protein [Streptococcus pneumon     | 48.18        | 3.13%    | 1          | 1      | 192   | 22.1     | 8.69     |
| 13    | 6.8      | 149002306 | hypothetical protein CGSSp14BS69_01654 [Streptococcus pneu       | 48.18        | 3.09%    | 1          | 1      | 194   | 22.3     | 7.55     |
| 14    | 6.9      | 148984004 | hypothetical protein CGSSp3BS71_07719 [Streptococcus pneur       | 48.18        | 3.09%    | 1          | 1      | 194   | 22.3     | 8.66     |
| 15    | 7        | P80511    | Protein S100-A12 n=4 Tax=Hominoidea RepID=S10AC_HUMAN            | 625.58       | 36.96%   | 4          | 14     | 92    | 10.6     | 6.25     |
| 16    | 8.1      | E9PFJ3    | Uncharacterized protein n=3 Tax=Simiiformes RepID=E9PFJ3_H       | 374.35       | 5.71%    | 3          | 8      | 578   | 63.3     | 5.31     |
| 17    | 8.2      | P07911    | Uromodulin n=2 Tax=Catarrhini RepID=UROM_HUMAN                   | 374.35       | 5.16%    | 3          | 8      | 640   | 69.7     | 5.24     |
| 18    | 9.1      | E9PG30    | Uncharacterized protein n=21 Tax=Coelomata RepID=E9PG30_         | 104.41       | 9.01%    | 2          | 2      | 333   | 37.1     | 5.54     |
| 19    | 9.2      | P62736    | Actin, aortic smooth muscle n=27 Tax=Eukaryota RepID=ACTA_       | 104.41       | 7.96%    | 2          | 2      | 377   | 42       | 5.39     |
| 20    | 9.3      | P63261    | Actin, cytoplasmic 2 n=1334 RepID=ACTG_HUMAN                     | 104.41       | 8.00%    | 2          | 2      | 375   | 41.8     | 5.48     |
| 21    | 9.4      | B4DW52    | Uncharacterized protein n=12 Tax=Coelomata RepID=B4DW52          | 104.41       | 8.65%    | 2          | 2      | 347   | 38.6     | 5.35     |
| 22    | 9.5      | B4E335    | Uncharacterized protein n=3 Tax=Coelomata RepID=B4E335_H         | 104.41       | 8.55%    | 2          | 2      | 351   | 39.2     | 5.59     |
| 23    | 9.6      | F5H0N0    | Uncharacterized protein n=11 Tax=Simiiformes RepID=F5H0N0        | 104.41       | 9.01%    | 2          | 2      | 333   | 37.4     | 5.58     |
| 24    | 9.7      | Q5T8M7    | Actin, alpha 1, skeletal muscle n=5 Tax=Simiiformes RepID=Q5T    | 104.41       | 8.77%    | 2          | 2      | 342   | 37.8     | 5.58     |
| 25    | 10.1     | F6PJX6    | Uncharacterized protein n=6 Tax=Eutheria RepID=F6PJX6_HOR        | 97.83        | 9.09%    | 1          | 1      | 308   | 35.6     | 4.72     |
| 26    | 10.2     | P13646    | Keratin, type I cytoskeletal 13 n=13 Tax=Simiiformes RepID=K1I   | 97.83        | 6.11%    | 1          | 1      | 458   | 49.6     | 4.96     |
| 27    | 10.3     | P13646-3  | Isoform 3 of Keratin, type I cytoskeletal 13 n=7 Tax=Eutheria Re | 97.83        | 6.67%    | 1          | 1      | 420   | 45.8     | 4.88     |
| 28    | 11.1     | P06899    | Histone H2B type 1-J n=102 Tax=Euteleostomi RepID=H2B1J_H        | 112.51       | 11.90%   | 1          | 1      | 126   | 13.9     | 10.32    |
| 29    | 11.2     | P62807    | Histone H2B type 1-C/E/F/G/I n=44 Tax=Euteleostomi RepID=H       | 112.51       | 11.90%   | 1          | 1      | 126   | 13.9     | 10.32    |
| 30    | 11.3     | B4DR52    | Histone H2B n=5 Tax=Euarchontoglires RepID=B4DR52_HUMAI          | 112.51       | 9.04%    | 1          | 1      | 166   | 18       | 10.32    |
| 31    | 11.4     | P58876    | Histone H2B type 1-D n=136 Tax=Coelomata RepID=H2B1D_HL          | 112.51       | 11.90%   | 1          | 1      | 126   | 13.9     | 10.32    |
| 32    | 12       | P05164    | Myeloperoxidase n=6 Tax=Catarrhini RepID=PERM_HUMAN              | 661.02       | 10.87%   | 5          | 13     | 745   | 83.8     | 8.97     |
| 33    | 13       | P02788    | Lactotransferrin n=24 Tax=Hominoidea RepID=TRFL_HUMAN            | 334.66       | 5.35%    | 3          | 6      | 710   | 78.1     | 8.12     |

**ZDLCS1\_36 Peptide Summary**

| Sequence                    | Protein Descriptions                                | # Proteins | # Protein Groups | Protein Group Accessions | Modifications  | q-Value | PEP      | Charge     | m/z [Da]   | MH+ [Da]   | Delta Mass [Da] |
|-----------------------------|-----------------------------------------------------|------------|------------------|--------------------------|----------------|---------|----------|------------|------------|------------|-----------------|
| mSQIER                      | Protein S100-A9 n=5 Tax=Hominoidea RepID=S10A       | 9          | 1                | P06702                   |                | 0.00761 | 0.0502   | 2          | 390.44839  | 779.88951  | 0.26            |
| mLTELK                      | Protein S100-A8 n=5 Tax=Hominoidea RepID=S10A       | 1          | 1                | P05109                   | M1(Oxidation)  | 0.00761 | 0.0764   | 2          | 440.44702  | 879.88677  | 0.22            |
| KDLQNLFK                    | Protein S100-A9 n=5 Tax=Hominoidea RepID=S10A       | 1          | 1                | P06702                   |                | 0.00589 | 0.0137   | 2          | 567.62634  | 1134.24541 | 0.29            |
| GHFDTLSKGELK                | Protein S100-A12 n=4 Tax=Hominoidea RepID=S10       | 1          | 1                | P80511                   |                | 0.00761 | 0.0315   | 2          | 666.58105  | 1332.15483 | 0.23            |
| IGLDLPAIINMQR               | Myeloperoxidase n=6 Tax=Catarrhini RepID=PERM       | 1          | 1                | P05164                   |                | 0.00761 | 0.0246   | 2          | 671.40002  | 1341.79277 | 0.53            |
| TALQPMVSALNIR               | Uncharacterized protein n=3 Tax=Simiiformes Repl    | 2          | 1                | E9PFJ3                   |                | 0       | 5.76E-05 | 2          | 707.58606  | 1414.16484 | 0.19            |
| GNFHAVYRDDLK                | Protein S100-A8 n=5 Tax=Hominoidea RepID=S10A       | 1          | 1                | P05109                   |                | 0       | 0.00263  | 2          | 718.06683  | 1435.12639 | 0.21            |
| LGHFDTLNGQEFK               | Protein S100-A9 n=5 Tax=Hominoidea RepID=S10A       | 1          | 1                | P06702                   |                | 0       | 5.25E-06 | 1          | 1455.74548 | 1455.74548 | 0.02            |
| YGHTLIQPFMFH                | Myeloperoxidase n=6 Tax=Catarrhini RepID=PERM       | 1          | 1                | P05164                   |                | 0       | 0.00853  | 2          | 755.56805  | 1510.12883 | 0.18            |
| SRDHGLPGYNAWR               | Myeloperoxidase n=6 Tax=Catarrhini RepID=PERM       | 1          | 1                | P05164                   | 0.00761        | 0.0314  | 2        | 765.04639  | 1529.0855  | 0.17       |                 |
| ILLAELEQLKGGQK              | Vimentin n=45 Tax=Amniota RepID=VIME_HUMAN          | 1          | 1                | P08670                   |                | 0       | 0.000154 | 2          | 770.6803   | 1540.35332 | 0.22            |
| SVNGKDAIWNLLR               | Lactotransferrin n=24 Tax=Hominoidea RepID=TRFI     | 1          | 1                | P02788                   |                | 0       | 1.30E-05 | 2          | 808.16284  | 1615.31841 | 0.23            |
| QLSFEFIMLMAR                | Protein S100-A9 n=5 Tax=Hominoidea RepID=S10A       | 1          | 1                | P06702                   |                | 0       | 0.000135 | 2          | 808.49487  | 1615.98247 | 0.59            |
| LDLAGRDLTYLKM               | Uncharacterized protein n=21 Tax=Coelomata Repl     | 7          | 1                | E9PG30                   |                | 0       | 0.000165 | 2          | 812.8728   | 1624.73833 | 0.45            |
| DSTIQVLENGESSQGR            | Uncharacterized protein n=3 Tax=Simiiformes Repl    | 2          | 1                | E9PFJ3                   |                | 0       | 1.23E-06 | 2          | 853.78229  | 1706.5573  | 0.38            |
| VEIHIMEDLDTNADK             | Protein S100-A9 n=5 Tax=Hominoidea RepID=S10A       | 1          | 1                | P06702                   |                | 0       | 2.65E-06 | 2          | 872.3988   | 1743.79033 | 0.48            |
| AMGIMNSFVNDIFER             | Histone H2B type 1-J n=102 Tax=Euteleostomi Repl    | 4          | 1                | P06899                   |                | 0       | 5.75E-07 | 2          | 872.91675  | 1744.82622 | 0.5             |
| SYELPDGQVITIGNER            | Uncharacterized protein n=21 Tax=Coelomata Repl     | 7          | 1                | E9PG30                   |                | 0       | 2.00E-06 | 2          | 896.35254  | 1791.6978  | 0.4             |
| NIETIINTFHQYSVK             | Protein S100-A9 n=5 Tax=Hominoidea RepID=S10A       | 1          | 1                | P06702                   |                | 0       | 0.000185 | 2          | 904.62744  | 1808.24761 | 0.65            |
| FQLFGSPGQKDLFFK             | Lactotransferrin n=24 Tax=Hominoidea RepID=TRFI     | 1          | 1                | P02788                   |                | 0       | 3.02E-07 | 2          | 906.67505  | 1812.34282 | 0.19            |
| VSLKTALQPMVSALNIR           | Uncharacterized protein n=3 Tax=Simiiformes Repl    | 2          | 1                | E9PFJ3                   |                | 0       | 7.56E-07 | 2          | 921.43396  | 1841.86064 | 0.4             |
| ALNSIIDVYHKYSLK             | Protein S100-A8 n=5 Tax=Hominoidea RepID=S10A       | 1          | 1                | P05109                   |                | 0       | 3.27E-06 | 2          | 939.49988  | 1877.99248 | 0.47            |
| AFTSEFTHFLEELTK             | phosphopyruvate hydratase [Escherichia coli CFT01   | 1          | 1                | 26249182                 |                | 0       | 5.93E-06 | 2          | 965.27869  | 1929.5501  | 0.31            |
| LGHFDTLNGQEFKELVR           | Protein S100-A9 n=5 Tax=Hominoidea RepID=S10A       | 1          | 1                | P06702                   |                | 0       | 0.00226  | 2          | 977.44202  | 1953.87676 | 0.43            |
| IIELAGFLDSYIPEPER           | translation elongation factor Tu [Enterobacter horr | 3          | 1                | 334126439                |                | 0       | 0.000835 | 2          | 981.95593  | 1962.90459 | 0.44            |
| WDFAPLQSLLEAGYSR            | outer membrane receptor FepA [Escherichia coli CF   | 1          | 1                | 26246561                 |                | 0       | 1.88E-07 | 2          | 992.0614   | 1983.11553 | 0.58            |
| LGHFDTLNGQEFKELVRK          | Protein S100-A9 n=5 Tax=Hominoidea RepID=S10A       | 1          | 1                | P06702                   |                | 0       | 1.12E-05 | 2          | 1041.49731 | 2081.98735 | 0.44            |
| MLTELEKALNSIIDVYHK          | Protein S100-A8 n=5 Tax=Hominoidea RepID=S10A       | 1          | 1                | P05109                   |                | 0       | 0.00079  | 3          | 706.68909  | 2118.05271 | 0.31            |
| mLLELEKALNSIIDVYHK          | Protein S100-A8 n=5 Tax=Hominoidea RepID=S10A       | 1          | 1                | P05109                   | M1(Oxidation)  | 0       | 9.29E-08 | 2          | 1067.60022 | 2134.19316 | 0.53            |
| MHEGDEGPGHHHKPLGEGTPT       | Protein S100-A9 n=5 Tax=Hominoidea RepID=S10A       | 1          | 1                | P06702                   |                | 0       | 1.86E-05 | 2          | 1088.92346 | 2176.83965 | 0.44            |
| mHEGDEGPGHHHKPLGEGTPT       | Protein S100-A9 n=5 Tax=Hominoidea RepID=S10A       | 1          | 1                | P06702                   | M1(Oxidation)  | 0       | 0.000121 | 2          | 1096.91199 | 2192.8167  | 0.43            |
| AVSNEIVRFPTDQLTPDQER        | Myeloperoxidase n=6 Tax=Catarrhini RepID=PERM       | 1          | 1                | P05164                   |                | 0       | 0.0104   | 2          | 1158.47742 | 2315.94756 | 0.39            |
| YDANNIYLAAQYQTYNATR         | outer membrane protein N [Enterobacter horma        | 2          | 2                | 334124896;26248604       |                | 0       | 9.03E-08 | 2          | 1177.8136  | 2354.61992 | -0.26           |
| TKLEEHLGIVNIFHQYSVR         | Protein S100-A12 n=4 Tax=Hominoidea RepID=S10       | 1          | 1                | P80511                   |                | 0       | 2.25E-06 | 2          | 1206.62073 | 2412.23418 | -0.02           |
| NMSTYVDYKINLLDNDQFTR        | outer membrane porin protein C [Escherichia coli C  | 1          | 1                | 26248604                 |                | 0       | 5.39E-06 | 2          | 1225.9967  | 2450.98613 | 0.41            |
| NMSTYVDYKINLLDNDQFTR        | outer membrane protein N [Enterobacter horma        | 1          | 1                | 334124896                | 0.00761        | 0.0229  | 3        | 818.0011   | 2451.98874 | 0.28       |                 |
| TKLEEHLGIVNIFHQYSVR         | Protein S100-A12 n=4 Tax=Hominoidea RepID=S10       | 1          | 1                | P80511                   | N-Term(Acetyl) | 0       | 4.97E-08 | 3          | 819.11005  | 2455.31559 | 0.35            |
| TKLEEHLGIVNIFHQYSVRK        | Protein S100-A12 n=4 Tax=Hominoidea RepID=S10       | 1          | 1                | P80511                   |                | 0       | 1.04E-06 | 2          | 1271.0553  | 2541.10332 | 0.37            |
| MTKLEHLGIVNIFHQYSVR         | Protein S100-A12 n=4 Tax=Hominoidea RepID=S10       | 1          | 1                | P80511                   |                | 0       | 0.00186  | 3          | 848.33832  | 2543.0004  | -0.1            |
| SQVEQLAEQNRKDAEAWFNEK       | Keratin, type I cytoskeletal 10 n=12 Tax=Eutheria R | 1          | 1                | P13645                   |                | 0       | 0.00205  | 3          | 862.19165  | 2584.5604  | 0.12            |
| FQLFGSPGQKDLFFKDSAIGFSR     | Lactotransferrin n=24 Tax=Hominoidea RepID=TRFI     | 1          | 1                | P02788                   |                | 0       | 1.75E-07 | 2          | 1323.60083 | 2646.19438 | 0.41            |
| mLLELEKALNSIIDVYHKYSLK      | Protein S100-A8 n=5 Tax=Hominoidea RepID=S10A       | 1          | 1                | P05109                   | M1(Oxidation)  | 0       | 6.35E-07 | 3          | 913.58215  | 2738.73191 | 0.42            |
| SLMFMQWGLLDHLDFTPEPAAR      | Myeloperoxidase n=6 Tax=Catarrhini RepID=PERM       | 1          | 1                | P05164                   |                | 0       | 2.80E-06 | 2          | 1410.09778 | 2819.18828 | 0.43            |
| DLGELEALKTELEDLTDSTAAQQLR   | Myosin-9 n=67 Tax=Tetrapoda RepID=MYH9_HUM          | 1          | 1                | P35579                   | 0.00761        | 0.101   | 3        | 1006.88245 | 3018.63279 | 0.38       |                 |
| VLDELTSKTDLEMQIESLNEELAYMKK | Uncharacterized protein n=6 Tax=Eutheria RepID=F    | 3          | 1                | F6PJX6                   |                | 0       | 1.70E-06 | 3          | 1095.61755 | 3284.83811 | 0.39            |
| VEIHIMEDLDTNADKLSFEFIMLMAR  | Protein S100-A9 n=5 Tax=Hominoidea RepID=S10A       | 1          | 1                | P06702                   |                | 0       | 1.88E-06 | 2          | 1670.20459 | 3339.4019  | 0.4             |
| VEIHIMEDLDTNADKLSFEFIMLMAR  | Protein S100-A9 n=5 Tax=Hominoidea RepID=S10A       | 1          | 1                | P06702                   | M24(Oxidation) | 0       | 0.00594  | 2          | 1678.2832  | 3355.55913 | 0.48            |

**2DLCSCI 1 Protein Summary**

| index | Prot_hit | Accession     | Description                                                        | Mascot Score | Coverage | # Peptides | # PSMs | # AAs | MW [kDa] | calc. pI |
|-------|----------|---------------|--------------------------------------------------------------------|--------------|----------|------------|--------|-------|----------|----------|
| 1     | 1        | P62805        | Histone H4 n=219 Tax=Eukaryota RepID=H4_HUMAN                      | 114.77       | 39.81%   | 3          | 3      | 103   | 11.4     | 11.36    |
| 2     | 2        | P35579        | Myosin-9 n=67 Tax=Tetrapoda RepID=MYH9_HUMAN                       | 128.95       | 1.58%    | 2          | 2      | 1960  | 226.4    | 5.6      |
| 3     | 3.1      | Q3BDU5        | Rhabdomyosarcoma antigen MU-RMS-40.12 n=10 Tax=Theria R            | 102.03       | 3.08%    | 1          | 1      | 487   | 55.6     | 6.65     |
| 4     | 3.2      | P02545        | Prelamin-A/C n=44 Tax=Eutheria RepID=LMNA_HUMAN                    | 102.03       | 2.26%    | 1          | 1      | 664   | 74.1     | 7.02     |
| 5     | 3.3      | Q5TCI9        | Lamin A/C (Fragment) n=3 Tax=Catarrhini RepID=Q5TCI9_HUM           | 102.03       | 2.92%    | 1          | 1      | 513   | 57.8     | 6.18     |
| 6     | 4        | P15924        | Desmoplakin n=28 Tax=Mammalia RepID=DESP_HUMAN                     | 152.25       | 1.60%    | 3          | 4      | 2871  | 331.6    | 6.81     |
| 7     | 5        | P04264        | Keratin, type II cytoskeletal 1 n=7 Tax=Eutheria RepID=K2C1_HU     | 3443.04      | 36.49%   | 26         | 79     | 644   | 66       | 8.12     |
| 8     | 6        | P35527        | Keratin, type I cytoskeletal 9 n=4 Tax=Catarrhini RepID=K1C9_H     | 383.7        | 7.54%    | 2          | 5      | 623   | 62       | 5.24     |
| 9     | 7        | P13645        | Keratin, type I cytoskeletal 10 n=12 Tax=Eutheria RepID=K1C10_     | 552.7        | 20.03%   | 10         | 19     | 584   | 58.8     | 5.21     |
| 10    | 8        | P02533        | Keratin, type I cytoskeletal 14 n=8 Tax=Eutheria RepID=K1C14_      | 493.74       | 14.41%   | 7          | 23     | 472   | 51.5     | 5.16     |
| 11    | 9        | P05109        | Protein S100-A8 n=5 Tax=Hominoidea RepID=S10A8_HUMAN               | 109.15       | 17.20%   | 2          | 3      | 93    | 10.8     | 7.03     |
| 12    | 10       | P35908        | Keratin, type II cytoskeletal 2 epidermal n=7 Tax=Simiiformes Re   | 1112.85      | 15.81%   | 10         | 34     | 639   | 65.4     | 8        |
| 13    | 11       | P12035        | Keratin, type II cytoskeletal 3 n=7 Tax=Catarrhini RepID=K2C3_     | 696.4        | 13.69%   | 9          | 31     | 628   | 64.4     | 6.48     |
| 14    | 12       | P02538        | Keratin, type II cytoskeletal 6A n=25 Tax=Euarchontoglires Repl    | 1957.39      | 30.85%   | 22         | 74     | 564   | 60       | 8        |
| 15    | 13       | Q8N1N4        | Keratin, type II cytoskeletal 78 n=7 Tax=Hominoidea RepID=K2C      | 371.67       | 7.31%    | 4          | 13     | 520   | 56.8     | 6.02     |
| 16    | 14       | P06702        | Protein S100-A9 n=5 Tax=Hominoidea RepID=S10A9_HUMAN               | 261.19       | 28.95%   | 3          | 7      | 114   | 13.2     | 6.13     |
| 17    | 15       | O60437        | Periplakin n=3 Tax=Hominoidea RepID=PEPL_HUMAN                     | 542.53       | 9.00%    | 10         | 15     | 1756  | 204.6    | 5.6      |
| 18    | 16       | P62937        | Peptidyl-prolyl cis-trans isomerase A n=98 Tax=Theria RepID=PF     | 219.98       | 24.24%   | 3          | 7      | 165   | 18       | 7.81     |
| 19    | 17.1     | E9PFJ3        | Uncharacterized protein n=3 Tax=Simiiformes RepID=E9PFJ3_H         | 694.38       | 7.96%    | 4          | 20     | 578   | 63.3     | 5.31     |
| 20    | 17.2     | P07911        | Uromodulin n=2 Tax=Catarrhini RepID=UROM_HUMAN                     | 694.38       | 7.19%    | 4          | 20     | 640   | 69.7     | 5.24     |
| 21    | 18.1     | F5H0N0        | Uncharacterized protein n=11 Tax=Simiiformes RepID=F5H0N0_         | 652.16       | 23.12%   | 8          | 21     | 333   | 37.4     | 5.58     |
| 22    | 18.2     | P63261        | Actin, cytoplasmic 2 n=1334 RepID=ACTG_HUMAN                       | 652.16       | 20.53%   | 8          | 21     | 375   | 41.8     | 5.48     |
| 23    | 18.3     | B4DW52        | Uncharacterized protein n=12 Tax=Coelomata RepID=B4DW52_           | 652.16       | 22.19%   | 8          | 21     | 347   | 38.6     | 5.35     |
| 24    | 18.4     | B4E335        | Uncharacterized protein n=3 Tax=Coelomata RepID=B4E335_HU          | 652.16       | 21.94%   | 8          | 21     | 351   | 39.2     | 5.59     |
| 25    | 19       | A4FUUA1       | GUCA1B protein (Fragment) n=1 Tax=Homo sapiens RepID=A4F           | 1207.45      | 68.00%   | 4          | 23     | 75    | 8.6      | 5.41     |
| 26    | 20       | P13646        | Keratin, type I cytoskeletal 13 n=13 Tax=Simiiformes RepID=K1C     | 2872.19      | 50.00%   | 22         | 96     | 458   | 49.6     | 4.96     |
| 27    | 21.1     | B4DRW1        | cDNA FLJ55805, highly similar to Keratin, type II cytoskeletal 4 n | 3272.98      | 54.01%   | 27         | 94     | 474   | 51.7     | 6.81     |
| 28    | 21.2     | P19013        | Keratin, type II cytoskeletal 4 n=14 Tax=Simiiformes RepID=K2C     | 3272.98      | 47.94%   | 27         | 94     | 534   | 57.2     | 6.61     |
| 29    | 22.1     | P06899        | Histone H2B type 1-J n=102 Tax=Euteleostomi RepID=H2B1J_HU         | 111.17       | 11.11%   | 1          | 2      | 126   | 13.9     | 10.32    |
| 30    | 22.2     | P62807        | Histone H2B type 1-C/E/F/G/I n=44 Tax=Euteleostomi RepID=H;        | 111.17       | 11.11%   | 1          | 2      | 126   | 13.9     | 10.32    |
| 31    | 22.3     | Q96A08        | Histone H2B type 1-A n=22 Tax=Eutheria RepID=H2B1A_HUMAI           | 111.17       | 11.02%   | 1          | 2      | 127   | 14.2     | 10.32    |
| 32    | 22.4     | B4DR52        | Histone H2B n=5 Tax=Euarchontoglires RepID=B4DR52_HUMAN            | 111.17       | 8.43%    | 1          | 2      | 166   | 18       | 10.32    |
| 33    | 22.5     | P58876        | Histone H2B type 1-D n=136 Tax=Coelomata RepID=H2B1D_HU            | 111.17       | 11.11%   | 1          | 2      | 126   | 13.9     | 10.32    |
| 34    | 23       | P04792        | Heat shock protein beta-1 n=6 Tax=Simiiformes RepID=HSPB1_I        | 344.37       | 33.17%   | 5          | 9      | 205   | 22.8     | 6.4      |
| 35    | 24.1     | E7EUJ4        | Pyruvate kinase n=4 Tax=Simiiformes RepID=E7EUJ4_HUMAN             | 70.53        | 4.37%    | 1          | 1      | 366   | 40.2     | 8.03     |
| 36    | 24.2     | P14618        | Pyruvate kinase isozymes M1/M2 n=16 Tax=Simiiformes RepID-         | 70.53        | 3.01%    | 1          | 1      | 531   | 57.9     | 7.84     |
| 37    | 24.3     | B4DRT3        | Pyruvate kinase n=2 Tax=Homo sapiens RepID=B4DRT3_HUMAI            | 70.53        | 3.13%    | 1          | 1      | 511   | 55.9     | 7.5      |
| 38    | 24.4     | B4DUU6        | Pyruvate kinase n=4 Tax=Simiiformes RepID=B4DUU6_HUMAN             | 70.53        | 3.10%    | 1          | 1      | 516   | 56.2     | 8.44     |
| 39    | 24.5     | E9PF79        | Pyruvate kinase n=4 Tax=Simiiformes RepID=E9PF79_HUMAN             | 70.53        | 3.49%    | 1          | 1      | 458   | 50       | 7.64     |
| 40    | 24.6     | P52480        | Pyruvate kinase isozymes M1/M2 n=40 Tax=Tetrapoda RepID=k          | 70.53        | 3.01%    | 1          | 1      | 531   | 57.8     | 7.47     |
| 41    | 25.1     | E7EU87        | Uncharacterized protein n=3 Tax=Simiiformes RepID=E7EU87_          | 1071.16      | 21.44%   | 13         | 38     | 555   | 58.9     | 5.97     |
| 42    | 25.2     | P13647        | Keratin, type II cytoskeletal 5 n=17 Tax=Eutheria RepID=K2C5_H     | 1071.16      | 20.17%   | 13         | 38     | 590   | 62.3     | 7.74     |
| 43    | 26       | P04083        | Annexin A1 n=14 Tax=Eutheria RepID=ANXA1_HUMAN                     | 1646.95      | 45.66%   | 14         | 35     | 346   | 38.7     | 7.02     |
| 44    | 27       | UPI00020CE287 | UPI00020CE287 related cluster n=1 Tax=Homo sapiens RepID=L         | 715.14       | 47.76%   | 8          | 53     | 201   | 23.1     | 4.97     |
| 45    | 28       | P14923        | Junction plakoglobin n=31 Tax=Theria RepID=PLAK_HUMAN              | 158.88       | 7.79%    | 4          | 4      | 745   | 81.7     | 6.14     |
| 46    | 29       | Q9UBG3        | Cornulin n=6 Tax=Catarrhini RepID=CRNN_HUMAN                       | 344.14       | 13.74%   | 4          | 5      | 495   | 53.5     | 6.1      |
| 47    | 30       | P04080        | Cystatin-B n=14 Tax=Simiiformes RepID=CYTB_HUMAN                   | 326.21       | 45.92%   | 3          | 8      | 98    | 11.1     | 7.56     |
| 48    | 31.1     | A4K467        | Actinin alpha4 isoform n=3 Tax=Simiiformes RepID=A4K467_HU         | 131.07       | 5.37%    | 2          | 2      | 521   | 59.5     | 4.94     |
| 49    | 31.2     | O43707        | Alpha-actinin-4 n=40 Tax=Tetrapoda RepID=ACTN4_HUMAN               | 131.07       | 3.07%    | 2          | 2      | 911   | 104.8    | 5.44     |
| 50    | 31.3     | D6PKK4        | Alpha actinin 4 short isoform n=8 Tax=Eutheria RepID=D6PKK4_       | 131.07       | 4.05%    | 2          | 2      | 692   | 79.9     | 5.17     |
| 51    | 32       | P27482        | Calmodulin-like protein 3 n=5 Tax=Euarchontoglires RepID=CAL       | 83.59        | 11.41%   | 1          | 1      | 149   | 16.9     | 4.42     |
| 52    | 33       | Q01469        | Fatty acid-binding protein, epidermal n=10 Tax=Simiiformes Ref     | 63.04        | 11.85%   | 1          | 1      | 135   | 15.2     | 7.01     |
| 53    | 34.1     | Q92817        | Envoplakin n=5 Tax=Simiiformes RepID=EVPL_HUMAN                    | 194.38       | 1.67%    | 2          | 4      | 2033  | 231.5    | 6.96     |
| 54    | 34.2     | B7ZLH8        | EVPL protein n=4 Tax=Simiiformes RepID=B7ZLH8_HUMAN                | 194.38       | 1.65%    | 2          | 4      | 2055  | 233.7    | 7.25     |
| 55    | 35.1     | F5H651        | Uncharacterized protein n=5 Tax=Catarrhini RepID=F5H651_HU         | 66.21        | 2.01%    | 1          | 1      | 646   | 72.8     | 9.26     |
| 56    | 35.2     | O95171        | Sciellin n=6 Tax=Catarrhini RepID=SCEL_HUMAN                       | 66.21        | 1.89%    | 1          | 1      | 688   | 77.5     | 9.38     |
| 57    | 36       | P18054        | Arachidonate 12-lipoxygenase, 12S-type n=5 Tax=Eutheria Repl       | 130.93       | 4.22%    | 2          | 3      | 663   | 75.6     | 6.21     |
| 58    | 37.1     | Q0QET7        | Glyceraldehyde-3-phosphate dehydrogenase (Fragment) n=4 Te         | 159.78       | 16.96%   | 2          | 4      | 230   | 24.6     | 8.51     |
| 59    | 37.2     | E7EUT5        | Glyceraldehyde-3-phosphate dehydrogenase n=3 Tax=Eutheria          | 159.78       | 15.00%   | 2          | 4      | 260   | 27.9     | 6.95     |
| 60    | 37.3     | P04406        | Glyceraldehyde-3-phosphate dehydrogenase n=42 Tax=Eutheria         | 159.78       | 11.64%   | 2          | 4      | 335   | 36       | 8.46     |
| 61    | 38.1     | P01834        | Ig kappa chain C region n=2 Tax=Homo sapiens RepID=IGKC_HU         | 378.25       | 57.55%   | 4          | 6      | 106   | 11.6     | 5.87     |
| 62    | 38.2     | UPI000011049E | IGG CTPM01 FAB (LIGHT CHAIN) n=2 Tax=Homo sapiens RepID=L          | 378.25       | 27.85%   | 4          | 6      | 219   | 24.1     | 7.74     |
| 63    | 38.3     | Q0KK16        | Immunoglobulin light chain (Fragment) n=3 Tax=Homo sapiens         | 378.25       | 27.85%   | 4          | 6      | 219   | 24       | 8.06     |
| 64    | 38.4     | Q5EFE6        | Anti-RhD monoclonal T125 kappa light chain n=1 Tax=Homo sap        | 378.25       | 26.07%   | 4          | 6      | 234   | 25.7     | 8.43     |
| 65    | 38.5     | Q6GMX0        | Putative uncharacterized protein n=14 Tax=Euarchontoglires Re      | 378.25       | 25.85%   | 4          | 6      | 236   | 25.8     | 7.97     |
| 66    | 38.6     | Q6P5S8        | IGK@ protein n=6 Tax=Homo sapiens RepID=Q6P5S8_HUMAN               | 378.25       | 25.85%   | 4          | 6      | 236   | 25.8     | 6.33     |
| 67    | 38.7     | Q7Z3Y4        | Putative uncharacterized protein n=3 Tax=Hominae RepID=Q7          | 378.25       | 25.85%   | 4          | 6      | 236   | 25.7     | 7.59     |
| 68    | 38.8     | UPI0000110495 | ANTIBODY A5B7 (LIGHT CHAIN) n=1 Tax=Homo sapiens RepID=l           | 378.25       | 28.64%   | 4          | 6      | 213   | 23.1     | 8.06     |
| 69    | 38.9     | UPI0000110769 | ANTIBODY n=1 Tax=Homo sapiens RepID=UPI0000110769                  | 378.25       | 28.50%   | 4          | 6      | 214   | 23.6     | 6.33     |
| 70    | 38.10    | UPI000014CDC4 | OMALIZUMAB LIGHT CHAIN n=2 Tax=Homo sapiens RepID=UPI              | 378.25       | 27.98%   | 4          | 6      | 218   | 23.9     | 5.39     |
| 71    | 38.11    | UPI00003CEBF2 | HU3S193 Fab fragment, light chain n=3 Tax=Euarchontoglires Re      | 378.25       | 27.85%   | 4          | 6      | 219   | 24       | 8.06     |
| 72    | 38.12    | UPI0001A7C522 | HUMAN IGG ABT-325 n=1 Tax=Homo sapiens RepID=UPI0001A              | 378.25       | 28.50%   | 4          | 6      | 214   | 23.5     | 6.55     |

| index | Prot_hit | Accession     | Description                                                       | Mascot Score | Coverage | # Peptides | # PSMs | # AAs | MW [kDa] | calc. pI |
|-------|----------|---------------|-------------------------------------------------------------------|--------------|----------|------------|--------|-------|----------|----------|
| 73    | 38.13    | UPI0001A7C54C | Fab Z13e1 n=3 Tax=Euarcontoglires RepID=UPI0001A7C54C             | 378.25       | 28.77%   | 4          | 6      | 212   | 23.1     | 7.71     |
| 74    | 38.14    | UPI0001C591D8 | Humanized recombinant Fab fragment of a murin n=5 Tax=Euar        | 378.25       | 26.64%   | 4          | 6      | 229   | 25.1     | 5.62     |
| 75    | 38.15    | UPI0001D3410B | Immunoglobulin light chain n=1 Tax=Homo sapiens RepID=UPI0        | 378.25       | 27.98%   | 4          | 6      | 218   | 23.3     | 8.05     |
| 76    | 38.16    | UPI0001F2FE82 | Fab 2G12, light chain n=2 Tax=Homo sapiens RepID=UPI0001F2        | 378.25       | 28.64%   | 4          | 6      | 213   | 23.2     | 8.13     |
| 77    | 38.17    | UPI0002003CF0 | IMMUNOGLOBULIN A1 LIGHT CHAIN n=1 Tax=Homo sapiens Re             | 378.25       | 27.85%   | 4          | 6      | 219   | 24       | 6.77     |
| 78    | 38.18    | UPI000211B3C2 | B3 (IGKV4-1) light chain n=1 Tax=Homo sapiens RepID=UPI0002       | 378.25       | 27.73%   | 4          | 6      | 220   | 24.2     | 6.55     |
| 79    | 38.19    | UPI0002177BCC | S4 FAB LIGHT CHAIN n=1 Tax=Homo sapiens RepID=UPI000217:          | 378.25       | 28.91%   | 4          | 6      | 211   | 22.7     | 7.77     |
| 80    | 39.1     | C7DJS1        | Glutathione S-transferase pi (Fragment) n=3 Tax=Homo sapiens      | 190.28       | 13.25%   | 1          | 3      | 151   | 16.7     | 5.1      |
| 81    | 39.2     | P09211        | Glutathione S-transferase P n=4 Tax=Simiiformes RepID=GSTP1       | 190.28       | 9.52%    | 1          | 3      | 210   | 23.3     | 5.64     |
| 82    | 40.1     | E5RGE1        | Uncharacterized protein n=6 Tax=Tetrapoda RepID=E5RGE1_HU         | 107.25       | 26.92%   | 1          | 1      | 52    | 5.9      | 4.78     |
| 83    | 40.2     | E7ESK7        | Uncharacterized protein n=7 Tax=Eutheria RepID=E7ESK7_HUM         | 107.25       | 10.22%   | 1          | 1      | 137   | 15.7     | 5.27     |
| 84    | 40.3     | P63104        | 14-3-3 protein zeta/delta n=26 Tax=Amniota RepID=1433Z_HUI        | 107.25       | 5.71%    | 1          | 1      | 245   | 27.7     | 4.79     |
| 85    | 41.1     | B4DWQ3        | Phosphoglycerate kinase n=7 Tax=Theria RepID=B4DWQ3_HUM           | 74.97        | 10.56%   | 1          | 1      | 161   | 17       | 5.6      |
| 86    | 41.2     | B4E1H9        | Phosphoglycerate kinase n=6 Tax=Amniota RepID=B4E1H9_HUI          | 74.97        | 5.20%    | 1          | 1      | 327   | 35       | 8.32     |
| 87    | 41.3     | P00558        | Phosphoglycerate kinase 1 n=36 Tax=Theria RepID=PGK1_HUM          | 74.97        | 4.08%    | 1          | 1      | 417   | 44.6     | 8.1      |
| 88    | 42       | P07737        | Profilin-1 n=21 Tax=Theria RepID=PROF1_HUMAN                      | 88.6         | 12.86%   | 1          | 1      | 140   | 15       | 8.27     |
| 89    | 43.1     | A1L195        | TUBB2B protein (Fragment) n=16 Tax=Fungi/Metazoa group Re         | 168.82       | 23.94%   | 2          | 3      | 188   | 20.6     | 5.05     |
| 90    | 43.2     | Q13885        | Tubulin beta-2A chain n=339 RepID=TBB2A_HUMAN                     | 168.82       | 10.11%   | 2          | 3      | 445   | 49.9     | 4.89     |
| 91    | 43.3     | Q5ST81        | Tubulin beta polypeptide n=8 Tax=Eukaryota RepID=Q5ST81_HI        | 168.82       | 12.10%   | 2          | 3      | 372   | 41.7     | 4.91     |
| 92    | 43.4     | E9PBJ4        | Uncharacterized protein n=2 Tax=Homo sapiens RepID=E9PBJ4_        | 168.82       | 18.52%   | 2          | 3      | 243   | 27.4     | 4.49     |
| 93    | 44.1     | Q05CF8        | KNG1 protein n=1 Tax=Homo sapiens RepID=Q05CF8_HUMAN              | 83.94        | 6.53%    | 1          | 1      | 291   | 33       | 6.67     |
| 94    | 44.2     | C9JEX1        | Uncharacterized protein n=3 Tax=Hominoidea RepID=C9JEX1_H         | 83.94        | 4.86%    | 1          | 1      | 391   | 43.8     | 6.43     |
| 95    | 44.3     | P01042        | Kininogen-1 n=11 Tax=Catarrhini RepID=KNG1_HUMAN                  | 83.94        | 2.95%    | 1          | 1      | 644   | 71.9     | 6.81     |
| 96    | 45.1     | C9K0S6        | Uncharacterized protein n=2 Tax=Simiiformes RepID=C9K0S6_H        | 82.13        | 44.68%   | 1          | 1      | 47    | 5.3      | 5.21     |
| 97    | 45.2     | C9JEV8        | Uncharacterized protein n=10 Tax=Coelomata RepID=C9JEV8_H         | 82.13        | 13.73%   | 1          | 1      | 153   | 16.9     | 5.53     |
| 98    | 45.3     | Q13748        | Tubulin alpha-3C/D chain n=18 Tax=Theria RepID=TBA3C_HUM.         | 82.13        | 4.67%    | 1          | 1      | 450   | 49.9     | 5.1      |
| 99    | 45.4     | Q71U36        | Tubulin alpha-1A chain n=597 RepID=TBA1A_HUMAN                    | 82.13        | 4.66%    | 1          | 1      | 451   | 50.1     | 5.06     |
| 100   | 45.5     | A8MUB1        | Tubulin, alpha 1 (Testis specific), isoform CRA_a n=3 Tax=Simiifc | 82.13        | 4.85%    | 1          | 1      | 433   | 48.3     | 5.01     |
| 101   | 45.6     | B3KPW9        | Tubulin, alpha 8, isoform CRA_b n=17 Tax=Amniota RepID=B3KI       | 82.13        | 5.48%    | 1          | 1      | 383   | 42.9     | 5.08     |
| 102   | 45.7     | F5H5D3        | Uncharacterized protein n=5 Tax=Simiiformes RepID=F5H5D3_1        | 82.13        | 4.05%    | 1          | 1      | 519   | 57.7     | 5.07     |
| 103   | 45.8     | E9PGK3        | Uncharacterized protein n=4 Tax=Catarrhini RepID=E9PGK3_HU        | 82.13        | 6.44%    | 1          | 1      | 326   | 36.7     | 8.44     |
| 104   | 45.9     | Q8WU19        | TUBA1B protein n=2 Tax=Homininae RepID=Q8WU19_HUMAN               | 82.13        | 6.27%    | 1          | 1      | 335   | 37.2     | 4.98     |
| 105   | 45.10    | C9JJQ8        | Uncharacterized protein n=1 Tax=Homo sapiens RepID=C9JJQ8_        | 82.13        | 10.61%   | 1          | 1      | 198   | 21.7     | 6.28     |
| 106   | 45.11    | Q29196        | Tubulin alpha-1 chain (Fragment) n=15 Tax=Eukaryota RepID=Q       | 82.13        | 17.65%   | 1          | 1      | 119   | 13.1     | 5.2      |
| 107   | 45.12    | Q6QMJ5        | Tubulin alpha-1 (Fragment) n=1 Tax=Homo sapiens RepID=Q6Q         | 82.13        | 21.43%   | 1          | 1      | 98    | 10.8     | 7.52     |





**2DLCSCI 16 Protein Summary**

| index | Prot_hit | Accession     | Description                                                        | Mascot Score | Coverage | # Peptides | # PSMs | # AAs | MW [kDa] | calc. pl |
|-------|----------|---------------|--------------------------------------------------------------------|--------------|----------|------------|--------|-------|----------|----------|
| 1     | 1.1      | 297206263     | phosphoglycerate kinase [Lactobacillus jensenii JV-V16]            | 58.12        | 2.98%    | 1          | 1      | 403   | 43       | 5.4      |
| 2     | 1.2      | 300361304     | phosphoglycerate kinase [Lactobacillus gasserii JV-V03]            | 58.12        | 2.98%    | 1          | 1      | 403   | 43       | 5.78     |
| 3     | 2.1      | 297206261     | enolase [Lactobacillus jensenii JV-V16]                            | 53.42        | 3.94%    | 1          | 1      | 432   | 47       | 4.84     |
| 4     | 2.2      | 300361306     | enolase [Lactobacillus gasserii JV-V03]                            | 53.42        | 3.94%    | 1          | 1      | 432   | 46.9     | 4.81     |
| 5     | 3.1      | 297205850     | elongation factor EF1A [Lactobacillus jensenii JV-V16]             | 86.52        | 4.04%    | 1          | 1      | 396   | 43.6     | 5.01     |
| 6     | 3.2      | 300811976     | translation elongation factor Tu [Lactobacillus delbrueckii subsp  | 86.52        | 4.04%    | 1          | 1      | 396   | 43.3     | 5.01     |
| 7     | 3.3      | 300361496     | elongation factor Tu [Lactobacillus gasserii JV-V03]               | 86.52        | 4.04%    | 1          | 1      | 396   | 43.7     | 4.98     |
| 8     | 4        | 297205326     | D-lactate dehydrogenase [Lactobacillus jensenii JV-V16]            | 49.62        | 5.41%    | 1          | 1      | 333   | 37.1     | 5.1      |
| 9     | 5        | 297205124     | 50S ribosomal protein L31 [Lactobacillus jensenii JV-V16]          | 100.8        | 21.18%   | 1          | 1      | 85    | 9.5      | 8.94     |
| 10    | 6        | P16401        | Histone H1.5 n=15 Tax=Eutheria ReplID=H15_HUMAN                    | 143.52       | 9.73%    | 2          | 4      | 226   | 22.6     | 10.92    |
| 11    | 7.1      | Q71U36        | Tubulin alpha-1A chain n=597 ReplID=TBA1A_HUMAN                    | 136.77       | 6.43%    | 2          | 3      | 451   | 50.1     | 5.06     |
| 12    | 7.2      | F5H5D3        | Uncharacterized protein n=5 Tax=Simiiformes ReplID=F5H5D3_H        | 136.77       | 5.59%    | 2          | 3      | 519   | 57.7     | 5.07     |
| 13    | 8        | P11021        | 78 kDa glucose-regulated protein n=68 Tax=Coelomata ReplID=C       | 65.18        | 2.14%    | 1          | 1      | 654   | 72.3     | 5.16     |
| 14    | 9        | P15924        | Desmoplakin n=28 Tax=Mammalia ReplID=DESP_HUMAN                    | 89.64        | 1.08%    | 2          | 3      | 2871  | 331.6    | 6.81     |
| 15    | 10       | P04264        | Keratin, type II cytoskeletal 1 n=7 Tax=Eutheria ReplID=K2C1_HL    | 2597.2       | 45.34%   | 24         | 60     | 644   | 66       | 8.12     |
| 16    | 11       | P13645        | Keratin, type I cytoskeletal 10 n=12 Tax=Eutheria ReplID=K1C10_    | 363.47       | 10.27%   | 5          | 9      | 584   | 58.8     | 5.21     |
| 17    | 12       | P02538        | Keratin, type II cytoskeletal 6A n=25 Tax=Euarchothoglyres ReplI   | 1091.85      | 26.42%   | 18         | 42     | 564   | 60       | 8        |
| 18    | 13       | Q8N1N4        | Keratin, type II cytoskeletal 78 n=7 Tax=Hominoidea ReplID=K2C     | 210.64       | 11.54%   | 5          | 7      | 520   | 56.8     | 6.02     |
| 19    | 14       | P06702        | Protein S100-A9 n=5 Tax=Hominoidea ReplID=S10A9_HUMAN              | 464.92       | 28.95%   | 4          | 12     | 114   | 13.2     | 6.13     |
| 20    | 15       | P98160        | Basement membrane-specific heparan sulfate proteoglycan cor        | 95.09        | 0.41%    | 1          | 1      | 4391  | 468.5    | 6.51     |
| 21    | 16       | P13647        | Keratin, type II cytoskeletal 5 n=17 Tax=Eutheria ReplID=K2C5_H    | 514.09       | 20.17%   | 11         | 23     | 590   | 62.3     | 7.74     |
| 22    | 17       | O60437        | Periplakin n=3 Tax=Hominoidea ReplID=PEPL_HUMAN                    | 331.08       | 5.47%    | 7          | 10     | 1756  | 204.6    | 5.6      |
| 23    | 18       | P62937        | Peptidyl-prolyl cis-trans isomerase A n=98 Tax=Theria ReplID=PF    | 156.65       | 24.24%   | 3          | 4      | 165   | 18       | 7.81     |
| 24    | 19.1     | E9PFJ3        | Uncharacterized protein n=3 Tax=Simiiformes ReplID=E9PFJ3_H        | 502.43       | 11.25%   | 6          | 12     | 578   | 63.3     | 5.31     |
| 25    | 19.2     | P07911        | Uromodulin n=2 Tax=Catarrhini ReplID=UROM_HUMAN                    | 502.43       | 10.16%   | 6          | 12     | 640   | 69.7     | 5.24     |
| 26    | 20.1     | F5H0N0        | Uncharacterized protein n=11 Tax=Simiiformes ReplID=F5H0N0_        | 342.51       | 23.42%   | 7          | 13     | 333   | 37.4     | 5.58     |
| 27    | 20.2     | P63261        | Actin, cytoplasmic 2 n=1334 ReplID=ACTG_HUMAN                      | 342.51       | 20.80%   | 7          | 13     | 375   | 41.8     | 5.48     |
| 28    | 20.3     | B4E335        | Uncharacterized protein n=3 Tax=Coelomata ReplID=B4E335_HI         | 342.51       | 22.22%   | 7          | 13     | 351   | 39.2     | 5.59     |
| 29    | 21       | P69905        | Hemoglobin subunit alpha n=29 Tax=Primates ReplID=HBA_HUN          | 139.96       | 10.56%   | 1          | 2      | 142   | 15.2     | 8.68     |
| 30    | 22       | A4FUA1        | GUCA1B protein (Fragment) n=1 Tax=Homo sapiens ReplID=A4F          | 929.78       | 68.00%   | 4          | 19     | 75    | 8.6      | 5.41     |
| 31    | 23.1     | P60524        | Hemoglobin subunit beta n=66 Tax=Eutheria ReplID=HBB_CANF.         | 57.37        | 9.59%    | 1          | 1      | 146   | 16       | 8.05     |
| 32    | 23.2     | P68871        | Hemoglobin subunit beta n=102 Tax=Primates ReplID=HBB_HUN          | 57.37        | 9.52%    | 1          | 1      | 147   | 16       | 7.28     |
| 33    | 24       | P13646        | Keratin, type I cytoskeletal 13 n=13 Tax=Simiiformes ReplID=K1C    | 2444.24      | 43.45%   | 23         | 77     | 458   | 49.6     | 4.96     |
| 34    | 25.1     | E7EUT5        | Glyceraldehyde-3-phosphate dehydrogenase n=3 Tax=Eutheria          | 136.15       | 10.38%   | 2          | 3      | 260   | 27.9     | 6.95     |
| 35    | 25.2     | P04406        | Glyceraldehyde-3-phosphate dehydrogenase n=42 Tax=Eutheri          | 136.15       | 8.06%    | 2          | 3      | 335   | 36       | 8.46     |
| 36    | 26.1     | B4DRW1        | cDNA FLJ55805, highly similar to Keratin, type II cytoskeletal 4 n | 2441.99      | 48.10%   | 26         | 70     | 474   | 51.7     | 6.81     |
| 37    | 26.2     | P19013        | Keratin, type II cytoskeletal 4 n=14 Tax=Simiiformes ReplID=K2C    | 2441.99      | 42.70%   | 26         | 70     | 534   | 57.2     | 6.61     |
| 38    | 27       | F6RMN8        | Uncharacterized protein n=4 Tax=Simiiformes ReplID=F6RMN8_         | 1046.42      | 27.85%   | 17         | 41     | 535   | 57.8     | 8.22     |
| 39    | 28.1     | E9PF79        | Pyruvate kinase n=4 Tax=Simiiformes ReplID=E9PF79_HUMAN            | 162.84       | 7.42%    | 2          | 3      | 458   | 50       | 7.64     |
| 40    | 28.2     | P14618        | Pyruvate kinase isozymes M1/M2 n=16 Tax=Simiiformes ReplID=        | 162.84       | 6.40%    | 2          | 3      | 531   | 57.9     | 7.84     |
| 41    | 28.3     | B4DRT3        | Pyruvate kinase n=2 Tax=Homo sapiens ReplID=B4DRT3_HUMAN           | 162.84       | 6.65%    | 2          | 3      | 511   | 55.9     | 7.5      |
| 42    | 28.4     | B4DUU6        | Pyruvate kinase n=4 Tax=Simiiformes ReplID=B4DUU6_HUMAN            | 162.84       | 6.59%    | 2          | 3      | 516   | 56.2     | 8.44     |
| 43    | 28.5     | P52480        | Pyruvate kinase isozymes M1/M2 n=40 Tax=Tetrapoda ReplID=K         | 162.84       | 6.40%    | 2          | 3      | 531   | 57.8     | 7.47     |
| 44    | 29.1     | P06899        | Histone H2B type 1-J n=102 Tax=Euteleostomi ReplID=H2B1J_HL        | 168.71       | 30.16%   | 3          | 4      | 126   | 13.9     | 10.32    |
| 45    | 29.2     | P62807        | Histone H2B type 1-C/E/F/G/I n=44 Tax=Euteleostomi ReplID=H:       | 168.71       | 30.16%   | 3          | 4      | 126   | 13.9     | 10.32    |
| 46    | 29.3     | B4DR52        | Histone H2B n=5 Tax=Euarchothoglyres ReplID=B4DR52_HUMAN           | 168.71       | 22.89%   | 3          | 4      | 166   | 18       | 10.32    |
| 47    | 29.4     | P58876        | Histone H2B type 1-D n=136 Tax=Coelomata ReplID=H2B1D_HU           | 168.71       | 30.16%   | 3          | 4      | 126   | 13.9     | 10.32    |
| 48    | 30       | P04792        | Heat shock protein beta-1 n=6 Tax=Simiiformes ReplID=HSPB1_I       | 824.76       | 56.59%   | 9          | 20     | 205   | 22.8     | 6.4      |
| 49    | 31       | P09211        | Glutathione S-transferase P n=4 Tax=Simiiformes ReplID=GSTP1_      | 150.3        | 14.76%   | 2          | 3      | 210   | 23.3     | 5.64     |
| 50    | 32       | P04083        | Annexin A1 n=14 Tax=Eutheria ReplID=ANXA1_HUMAN                    | 1262.15      | 54.91%   | 17         | 28     | 346   | 38.7     | 7.02     |
| 51    | 33       | UPI00020CE287 | UPI00020CE287 related cluster n=1 Tax=Homo sapiens ReplID=L        | 359.9        | 51.74%   | 6          | 27     | 201   | 23.1     | 4.97     |
| 52    | 34.1     | Q06830        | Peroxisome oxidin-1 n=31 Tax=Mammalia ReplID=PRDX1_HUMAN           | 73.38        | 6.03%    | 1          | 1      | 199   | 22.1     | 8.13     |
| 53    | 34.2     | E9PEN3        | Uncharacterized protein n=4 Tax=Eutheria ReplID=E9PEN3_HUM         | 73.38        | 4.67%    | 1          | 1      | 257   | 29.3     | 5.69     |
| 54    | 34.3     | Q13162        | Peroxisome oxidin-4 n=11 Tax=Eutheria ReplID=PRDX4_HUMAN           | 73.38        | 4.43%    | 1          | 1      | 271   | 30.5     | 6.29     |
| 55    | 35.1     | A9X7H1        | Eukaryotic translation elongation factor 1 alpha (Fragment) n=2    | 100.31       | 7.34%    | 1          | 2      | 177   | 19.4     | 7.28     |
| 56    | 35.2     | P68104        | Elongation factor 1-alpha 1 n=117 Tax=Euteleostomi ReplID=EF1      | 100.31       | 2.81%    | 1          | 2      | 462   | 50.1     | 9.01     |
| 57    | 35.3     | Q6IQ15        | EEF1A1 protein n=17 Tax=Theria ReplID=Q6IQ15_HUMAN                 | 100.31       | 2.95%    | 1          | 2      | 441   | 47.8     | 9.03     |
| 58    | 36.1     | F2Z257        | Uncharacterized protein n=10 Tax=Catarrhini ReplID=F2Z257_HI       | 81.19        | 1.08%    | 1          | 1      | 1478  | 167.9    | 6.62     |
| 59    | 36.2     | P35579        | Myosin-9 n=67 Tax=Tetrapoda ReplID=MYH9_HUMAN                      | 81.19        | 0.82%    | 1          | 1      | 1960  | 226.4    | 5.6      |
| 60    | 36.3     | P35749        | Myosin-11 n=82 Tax=Amniota ReplID=MYH11_HUMAN                      | 81.19        | 0.81%    | 1          | 1      | 1972  | 227.2    | 5.5      |
| 61    | 36.4     | F2Z2U9        | Uncharacterized protein n=4 Tax=Catarrhini ReplID=F2Z2U9_HU        | 81.19        | 0.90%    | 1          | 1      | 1779  | 203      | 6.27     |
| 62    | 36.5     | Q7Z406        | Myosin-14 n=13 Tax=Eutheria ReplID=MYH14_HUMAN                     | 81.19        | 0.80%    | 1          | 1      | 1995  | 227.7    | 5.6      |
| 63    | 37       | P14923        | Junction plakoglobin n=31 Tax=Theria ReplID=PLAK_HUMAN             | 103.46       | 2.42%    | 1          | 1      | 745   | 81.7     | 6.14     |
| 64    | 38       | P07355        | Annexin A2 n=28 Tax=Eutheria ReplID=ANXA2_HUMAN                    | 256.22       | 21.83%   | 4          | 8      | 339   | 38.6     | 7.75     |
| 65    | 39       | Q9UBG3        | Cornulin n=6 Tax=Catarrhini ReplID=CRNN_HUMAN                      | 661.89       | 24.04%   | 6          | 10     | 495   | 53.5     | 6.1      |
| 66    | 40       | P04080        | Cystatin-B n=14 Tax=Simiiformes ReplID=CYTB_HUMAN                  | 311.22       | 45.92%   | 3          | 8      | 98    | 11.1     | 7.56     |
| 67    | 41.1     | P62784        | Histone H4 n=232 Tax=Eukaryota ReplID=H4_CAEL                      | 80.56        | 11.65%   | 1          | 3      | 103   | 11.4     | 11.19    |
| 68    | 41.2     | P62805        | Histone H4 n=219 Tax=Eukaryota ReplID=H4_HUMAN                     | 80.56        | 11.65%   | 1          | 3      | 103   | 11.4     | 11.36    |
| 69    | 42       | P31947        | 14-3-3 protein sigma n=20 Tax=Eutheria ReplID=1433S_HUMAN          | 148.8        | 17.34%   | 3          | 5      | 248   | 27.8     | 4.74     |
| 70    | 43       | P06733        | Alpha-enolase n=53 Tax=Euteleostomi ReplID=ENOA_HUMAN              | 102.42       | 9.45%    | 2          | 2      | 434   | 47.1     | 7.39     |
| 71    | 44.1     | A4K467        | Actinin alpha4 isoform n=3 Tax=Simiiformes ReplID=A4K467_HU        | 82.19        | 3.26%    | 1          | 1      | 521   | 59.5     | 4.94     |
| 72    | 44.2     | O43707        | Alpha-actinin-4 n=40 Tax=Tetrapoda ReplID=ACTN4_HUMAN              | 82.19        | 1.87%    | 1          | 1      | 911   | 104.8    | 5.44     |



| index | Prot_hit | Accession     | Description                                                     | Mascot Score | Coverage | # Peptides | # PSMs | # AAs | MW [kDa] | calc. pl |
|-------|----------|---------------|-----------------------------------------------------------------|--------------|----------|------------|--------|-------|----------|----------|
| 73    | 44.3     | D6PXX4        | Alpha actinin 4 short isoform n=8 Tax=Eutheria RepID=D6PXX4_    | 82.19        | 2.46%    | 1          | 1      | 692   | 79.9     | 5.17     |
| 74    | 45       | P29508        | Serpin B3 n=14 Tax=Hominoidea RepID=SPB3_HUMAN                  | 301.43       | 14.36%   | 5          | 7      | 390   | 44.5     | 6.81     |
| 75    | 46       | Q01469        | Fatty acid-binding protein, epidermal n=10 Tax=Simiiformes Ref  | 92.98        | 11.85%   | 1          | 2      | 135   | 15.2     | 7.01     |
| 76    | 47.1     | C9J0D1        | Histone H2A n=1 Tax=Homo sapiens RepID=C9J0D1_HUMAN             | 118.31       | 7.38%    | 1          | 3      | 122   | 13.2     | 9.99     |
| 77    | 47.2     | P0C0S5        | Histone H2A.Z n=78 Tax=Metazoa RepID=H2AZ_HUMAN                 | 118.31       | 7.03%    | 1          | 3      | 128   | 13.5     | 10.58    |
| 78    | 47.3     | P0C0S8        | Histone H2A type 1 n=295 Tax=Eukaryota RepID=H2A1_HUMAN         | 118.31       | 6.92%    | 1          | 3      | 130   | 14.1     | 10.9     |
| 79    | 47.4     | P16104        | Histone H2A.x n=16 Tax=Coelomata RepID=H2AX_HUMAN               | 118.31       | 6.29%    | 1          | 3      | 143   | 15.1     | 10.74    |
| 80    | 47.5     | Q16777        | Histone H2A type 2-C n=33 Tax=Eumetazoa RepID=H2A2C_HUN         | 118.31       | 6.98%    | 1          | 3      | 129   | 14       | 10.9     |
| 81    | 47.6     | Q71U99        | Histone H2A.V n=25 Tax=Bilateria RepID=H2AV_HUMAN               | 118.31       | 7.03%    | 1          | 3      | 128   | 13.5     | 10.58    |
| 82    | 47.7     | C9JE22        | Histone H2A n=7 Tax=Eutheria RepID=C9JE22_HUMAN                 | 118.31       | 5.96%    | 1          | 3      | 151   | 16.1     | 10.23    |
| 83    | 47.8     | Q96KK5        | Histone H2A type 1-H n=10 Tax=Mammalia RepID=H2A1H_HUN          | 118.31       | 7.03%    | 1          | 3      | 128   | 13.9     | 10.89    |
| 84    | 47.9     | Q99878        | Histone H2A type 1-J n=4 Tax=Eutheria RepID=H2A1J_HUMAN         | 118.31       | 7.03%    | 1          | 3      | 128   | 13.9     | 10.89    |
| 85    | 47.10    | Q8IU66        | Histone H2A type 2-B n=5 Tax=Eutheria RepID=H2A2B_HUMAN         | 118.31       | 6.92%    | 1          | 3      | 130   | 14       | 10.89    |
| 86    | 48.1     | Q92817        | Envoplakin n=5 Tax=Simiiformes RepID=EVPL_HUMAN                 | 125.85       | 1.48%    | 2          | 2      | 2033  | 231.5    | 6.96     |
| 87    | 48.2     | B7ZLH8        | EVPL protein n=4 Tax=Simiiformes RepID=B7ZLH8_HUMAN             | 125.85       | 1.46%    | 2          | 2      | 2055  | 233.7    | 7.25     |
| 88    | 49.1     | P16403        | Histone H1.2 n=12 Tax=Eutheria RepID=H12_HUMAN                  | 162.98       | 12.68%   | 2          | 3      | 213   | 21.4     | 10.93    |
| 89    | 49.2     | P10412        | Histone H1.4 n=20 Tax=Eutheria RepID=H14_HUMAN                  | 162.98       | 12.33%   | 2          | 3      | 219   | 21.9     | 11.03    |
| 90    | 49.3     | P16402        | Histone H1.3 n=6 Tax=Simiiformes RepID=H13_HUMAN                | 162.98       | 12.22%   | 2          | 3      | 221   | 22.3     | 11.02    |
| 91    | 49.4     | Q02539        | Histone H1.1 n=5 Tax=Catarrhini RepID=H11_HUMAN                 | 162.98       | 12.56%   | 2          | 3      | 215   | 21.8     | 10.99    |
| 92    | 50.1     | F5H651        | Uncharacterized protein n=5 Tax=Catarrhini RepID=F5H651_HU      | 72.82        | 2.01%    | 1          | 1      | 646   | 72.8     | 9.26     |
| 93    | 50.2     | O95171        | Sciellin n=6 Tax=Catarrhini RepID=SCEL_HUMAN                    | 72.82        | 1.89%    | 1          | 1      | 688   | 77.5     | 9.38     |
| 94    | 51       | P18054        | Arachidonate 12-lipoxygenase, 12S-type n=5 Tax=Eutheria Repl    | 51.74        | 1.81%    | 1          | 1      | 663   | 75.6     | 6.21     |
| 95    | 52.1     | P07476        | Involucrin n=2 Tax=Homo sapiens RepID=INVO_HUMAN                | 96.11        | 4.79%    | 2          | 2      | 585   | 68.4     | 4.61     |
| 96    | 52.2     | B4DU44        | Involucrin n=2 Tax=Homininae RepID=B4DU44_HUMAN                 | 96.11        | 4.71%    | 2          | 2      | 595   | 69.6     | 4.6      |
| 97    | 52.3     | Q28423        | Involucrin n=2 Tax=Homininae RepID=Q28423_9PRIM                 | 96.11        | 4.41%    | 2          | 2      | 635   | 74       | 4.61     |
| 98    | 53.1     | E9PI65        | Uncharacterized protein n=1 Tax=Homo sapiens RepID=E9PI65_      | 125.61       | 10.12%   | 1          | 2      | 168   | 17.9     | 5.29     |
| 99    | 53.2     | P11142        | Heat shock cognate 71 kDa protein n=167 Tax=Metazoa RepID=      | 125.61       | 2.63%    | 1          | 2      | 646   | 70.9     | 5.52     |
| 100   | 53.3     | P54652        | Heat shock-related 70 kDa protein 2 n=38 Tax=Amniota RepID=     | 125.61       | 2.66%    | 1          | 2      | 639   | 70       | 5.74     |
| 101   | 53.4     | B3KTV0        | cDNA FLJ38781 fis, clone LIVER2000216, highly similar to HEAT ! | 125.61       | 2.74%    | 1          | 2      | 621   | 67.9     | 5.45     |
| 102   | 54.1     | F6Y193        | Uncharacterized protein n=3 Tax=Simiiformes RepID=F6Y193_C      | 51.74        | 3.12%    | 1          | 1      | 417   | 45.1     | 5.73     |
| 103   | 54.2     | P08107        | Heat shock 70 kDa protein 1A/1B n=76 Tax=Gnathostomata Ref      | 51.74        | 2.03%    | 1          | 1      | 641   | 70       | 5.66     |
| 104   | 54.3     | E7EQL7        | Uncharacterized protein n=2 Tax=Homo sapiens RepID=E7EQL7       | 51.74        | 2.31%    | 1          | 1      | 563   | 61.4     | 5.69     |
| 105   | 55       | P63104        | 14-3-3 protein zeta/delta n=26 Tax=Amniota RepID=1433Z_HUF      | 131.68       | 13.06%   | 2          | 2      | 245   | 27.7     | 4.79     |
| 106   | 56       | Q09666        | Neuroblast differentiation-associated protein AHNK n=14 Tax=    | 110.96       | 1.66%    | 1          | 4      | 5890  | 628.7    | 6.15     |
| 107   | 57       | C9JZ65        | Uncharacterized protein n=1 Tax=Homo sapiens RepID=C9JZ65_      | 201.68       | 19.91%   | 3          | 4      | 211   | 24.4     | 6.61     |
| 108   | 58       | P01040        | Cystatin-A n=6 Tax=Catarrhini RepID=CYTA_HUMAN                  | 124.73       | 14.29%   | 1          | 2      | 98    | 11       | 5.5      |
| 109   | 59       | Q9UBC9        | Small proline-rich protein 3 n=4 Tax=Homininae RepID=SPRR3_I    | 251.16       | 27.81%   | 3          | 7      | 169   | 18.1     | 8.57     |
| 110   | 60.1     | B4DFK7        | Carbonyl reductase 1, isoform CRA_c n=2 Tax=Simiiformes Repl    | 94.3         | 9.83%    | 1          | 2      | 173   | 18.7     | 8.02     |
| 111   | 60.2     | A8MTM1        | Uncharacterized protein n=1 Tax=Homo sapiens RepID=A8MTM        | 94.3         | 7.66%    | 1          | 2      | 222   | 24.5     | 8.76     |
| 112   | 60.3     | E9PQ63        | Uncharacterized protein n=1 Tax=Homo sapiens RepID=E9PQ63       | 94.3         | 9.55%    | 1          | 2      | 178   | 19       | 6.3      |
| 113   | 60.4     | P16152        | Carbonyl reductase [NADPH] 1 n=7 Tax=Simiiformes RepID=CBF      | 94.3         | 6.14%    | 1          | 2      | 277   | 30.4     | 8.32     |
| 114   | 61       | P18510        | Interleukin-1 receptor antagonist protein n=4 Tax=Catarrhini Re | 86.27        | 9.04%    | 1          | 2      | 177   | 20       | 6.19     |
| 115   | 62.1     | P01834        | Ig kappa chain C region n=2 Tax=Homo sapiens RepID=IGKC_HU      | 57.53        | 16.98%   | 1          | 1      | 106   | 11.6     | 5.87     |
| 116   | 62.2     | UPI000011049E | IGG CTM01 FAB (LIGHT CHAIN) n=2 Tax=Homo sapiens RepID=L        | 57.53        | 8.22%    | 1          | 1      | 219   | 24.1     | 7.74     |
| 117   | 62.3     | Q0KKI6        | Immunoglobulin light chain (Fragment) n=3 Tax=Homo sapiens      | 57.53        | 8.22%    | 1          | 1      | 219   | 24       | 8.06     |
| 118   | 62.4     | Q569I7        | Putative uncharacterized protein n=1 Tax=Homo sapiens RepID=    | 57.53        | 9.52%    | 1          | 1      | 189   | 20.7     | 5.27     |
| 119   | 62.5     | Q5EFE6        | Anti-RhD monoclonal T125 kappa light chain n=1 Tax=Homo saq     | 57.53        | 7.69%    | 1          | 1      | 234   | 25.7     | 8.43     |
| 120   | 62.6     | Q6GMX0        | Putative uncharacterized protein n=14 Tax=Euarchontoglires Re   | 57.53        | 7.63%    | 1          | 1      | 236   | 25.8     | 7.97     |
| 121   | 62.7     | Q6P5S8        | IGK@ protein n=6 Tax=Homo sapiens RepID=Q6P5S8_HUMAN            | 57.53        | 7.63%    | 1          | 1      | 236   | 25.8     | 6.33     |
| 122   | 62.8     | Q7Z3Y4        | Putative uncharacterized protein n=3 Tax=Homininae RepID=Q7     | 57.53        | 7.63%    | 1          | 1      | 236   | 25.7     | 7.59     |
| 123   | 62.9     | UPI000011049S | ANTIBODY A5B7 (LIGHT CHAIN) n=1 Tax=Homo sapiens RepID=I        | 57.53        | 8.45%    | 1          | 1      | 213   | 23.1     | 8.06     |
| 124   | 62.10    | UPI0000110769 | ANTIBODY n=1 Tax=Homo sapiens RepID=UPI0000110769               | 57.53        | 8.41%    | 1          | 1      | 214   | 23.6     | 6.33     |
| 125   | 62.11    | UPI000014CD4C | OMALIZUMAB LIGHT CHAIN n=2 Tax=Homo sapiens RepID=UPI           | 57.53        | 8.26%    | 1          | 1      | 218   | 23.9     | 5.39     |
| 126   | 62.12    | UPI00003CEBF2 | HU3S193 Fab fragment, light chain n=3 Tax=Euarchontoglires Re   | 57.53        | 8.22%    | 1          | 1      | 219   | 24       | 8.06     |
| 127   | 62.13    | UPI00006EB13F | Fab m18, Light Chain n=1 Tax=Homo sapiens RepID=UPI00006E       | 57.53        | 8.45%    | 1          | 1      | 213   | 23.4     | 7.27     |
| 128   | 62.14    | UPI0001A7C522 | HUMAN IGG ABT-325 n=1 Tax=Homo sapiens RepID=UPI0001A7          | 57.53        | 8.41%    | 1          | 1      | 214   | 23.5     | 6.55     |
| 129   | 62.15    | UPI0001A7C54C | Fab Z13e1 n=3 Tax=Euarchontoglires RepID=UPI0001A7C54C          | 57.53        | 8.49%    | 1          | 1      | 212   | 23.1     | 7.71     |
| 130   | 62.16    | UPI0001C591D8 | Humanized recombinant Fab fragment of a murin n=5 Tax=Euar      | 57.53        | 7.86%    | 1          | 1      | 229   | 25.1     | 5.62     |
| 131   | 62.17    | UPI0001D3410B | Immunoglobulin light chain n=1 Tax=Homo sapiens RepID=UPI0      | 57.53        | 8.26%    | 1          | 1      | 218   | 23.3     | 8.05     |
| 132   | 62.18    | UPI0001F2FE82 | Fab 2G12, light chain n=2 Tax=Homo sapiens RepID=UPI0001F2      | 57.53        | 8.45%    | 1          | 1      | 213   | 23.2     | 8.13     |
| 133   | 62.19    | UPI0002003CF0 | IMMUNOGLOBULIN A1 LIGHT CHAIN n=1 Tax=Homo sapiens Re           | 57.53        | 8.22%    | 1          | 1      | 219   | 24       | 6.77     |
| 134   | 62.20    | UPI000211B3C2 | B3 (IGKV4-1) light chain n=1 Tax=Homo sapiens RepID=UPI0002     | 57.53        | 8.18%    | 1          | 1      | 220   | 24.2     | 6.55     |
| 135   | 62.21    | UPI0002177BCC | S4 FAB LIGHT CHAIN n=1 Tax=Homo sapiens RepID=UPI0002177        | 57.53        | 8.53%    | 1          | 1      | 211   | 22.7     | 7.77     |
| 136   | 63       | P37802        | Transgelin-2 n=14 Tax=Theria RepID=TAGL2_HUMAN                  | 96.81        | 9.05%    | 1          | 1      | 199   | 22.4     | 8.25     |
| 137   | 64.1     | B4E1Q0        | Uncharacterized protein n=2 Tax=Theria RepID=B4E1Q0_HUMA        | 50.38        | 12.82%   | 1          | 1      | 156   | 17.3     | 5.55     |
| 138   | 64.2     | B3KQV6        | cDNA FLJ33169 fis, clone ADRGL2000384, highly similar to Serin  | 50.38        | 4.88%    | 1          | 1      | 410   | 45.6     | 5.36     |
| 139   | 64.3     | B4DQY1        | cDNA FLJ56133, highly similar to Serine/threonine-protein phos  | 50.38        | 3.60%    | 1          | 1      | 555   | 61.5     | 5.12     |
| 140   | 64.4     | E9PH38        | Uncharacterized protein n=2 Tax=Homo sapiens RepID=E9PH38       | 50.38        | 3.93%    | 1          | 1      | 509   | 56.8     | 5.69     |
| 141   | 64.5     | P30153        | Serine/threonine-protein phosphatase 2A 65 kDa regulatory sul   | 50.38        | 3.40%    | 1          | 1      | 589   | 65.3     | 5.11     |
